# Supplementary material for: Cu(i)-Catalyzed addition–cycloisomerization difunctionalization reaction of 1,3-enyne-alkylidenecyclopropanes (ACPs)
Source: Royal Society of Chemistry journal article supplement (doi:10.1039/d0ob01692f), 2020-01-01
Supplement: d0ob01692f1.pdf [file d0ob01692f1.pdf]

---

Supporting Information

**Cu(I)-Catalyzed Addition-Cycloisomerization Difunctionalization Reaction of  
1,3-Enyne-Alkylidenecyclopropanes (ACPs)**

Peng-Hua Li,<sup>a,b</sup> Yin Wei<sup>a</sup> and Min Shi<sup>a,b\*</sup>

<sup>a</sup> State Key Laboratory of Organometallic Chemistry, Center for Excellence in Molecular Synthesis, Shanghai Institute of Organic Chemistry, Chinese Academy of Sciences, 354 Fenglin Lu, Shanghai 200032, People's Republic of China

<sup>b</sup> Key Laboratory for Advanced Materials and Institute of Fine Chemicals, School of Chemistry & Molecular Engineering, East China University of Science and Technology, 130 Meilong Road, Shanghai 200237, People's Republic of China

Fax: (+86)-21-6416-6128; e-mail: [mshi@mail.sioc.ac.cn](mailto:mshi@mail.sioc.ac.cn)

**CONTENTS**

|                                                                            |           |
|----------------------------------------------------------------------------|-----------|
| <b>1 General procedure for the preparation of starting materials .....</b> | <b>1</b>  |
| <b>2 Copies of NMR spectra of all compounds .....</b>                      | <b>4</b>  |
| <b>3 X-ray crystal data of compounds 2c and 3b.....</b>                    | <b>77</b> |
| <b>4 References .....</b>                                                  | <b>79</b> |

## 1 General procedure for the preparation of starting materials

### 1.1 Preparation of substrates 1a-1k

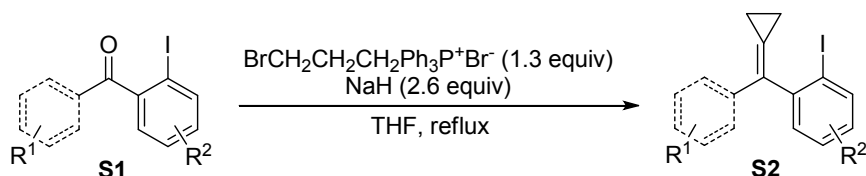

#### Preparation of substrates **S2**

A solution of (4-bromobutyl)triphenylphosphonium bromide (1.3 equiv) and NaH (2.6 equiv) in THF (25 mL) was stirred at 70 °C under  $\text{N}_2$  for 2-6 h. Upon the reaction system becomes orange, the compound **S1**<sup>1</sup> (1.0 equiv) in THF (10 mL) was added after 0.5 h. The reaction mixture was stirred for another 4-10 h until the completion of compound **S1**. The reaction mixture was cooled to room temperature and filtered through a celite. The filtrate was concentrated under reduced pressure and the residue was purified by a silica gel flash chromatography (eluent: petroleum ether) to afford the products **S2** in moderate yields.

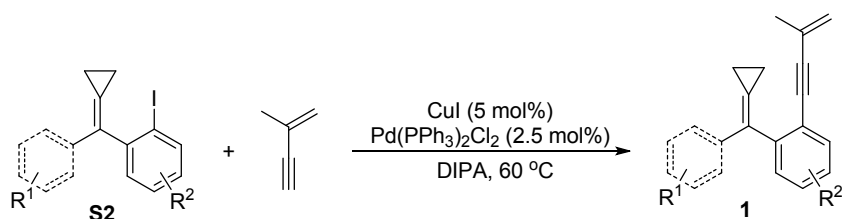

#### Preparation of substrates 1a-1k

To a stirred solution of **S2** (1.0 equiv) and 2-methyl-1-buten-3-yne (1.2 equiv) in degassed diisopropylamine (DIPA) (30 mL) was added  $\text{PdCl}_2(\text{PPh}_3)_2$  (2.5 mol%) and  $\text{CuI}$  (5 mol%). The resulted mixture was stirred at 60 °C for 4 h. After the separation of ammonium salt by filtration and the removal of solvent under reduced pressure, the residue was purified by a column chromatography on silica gel (eluent: petroleum ether) to afford the corresponding products **1a-1k** in moderate yields.

## 1.2 Preparation of substrates 11-1v

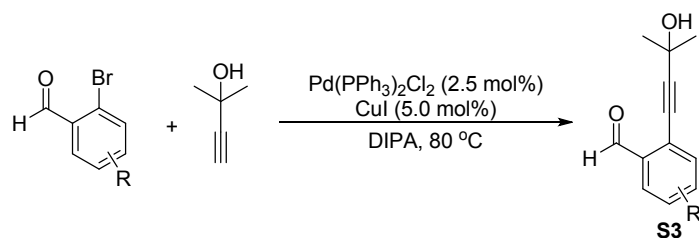

### Preparation of substrates **S3**

To a stirred solution of substituted 2-bromobenzaldehyde (1.0 equiv) and 3-methyl butynol (1.2 equiv) in degassed diisopropylamine (DIPA) (30 mL) was added PdCl<sub>2</sub>(PPh<sub>3</sub>)<sub>2</sub> (2.5 mol%) and CuI (5 mol%). The resulted mixture was stirred at 80 °C overnight. After the separation of ammonium salt by filtration and the removal of solvent under reduced pressure, the residue was purified by a column chromatography on silica gel (eluent: petroleum ether/ethyl acetate = 10/1) to afford the corresponding products **S3** in excellent yields.

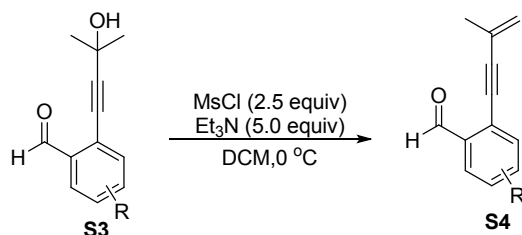

### Preparation of substrates **S4**<sup>2</sup>

To a stirred solution of **S3** (1.0 equiv) in dry dichloromethane (DCM) (15 mL) was added Et<sub>3</sub>N (5.0 equiv) and methanesulfonyl chloride (MsCl) (2.5 equiv) at 0 °C sequentially and slowly. The resulted mixture was stirred at 0 °C for 30-60 min. Upon completion, the reaction was quenched by addition of water, and washed with a saturated NaCl solution, dried over anhydrous Na<sub>2</sub>SO<sub>4</sub>, and concentrated under reduced pressure. The residue was purified by a column chromatography on silica gel (eluent: petroleum ether/ ethyl acetate = 25/1) to afford the corresponding products **S4** in good yields.

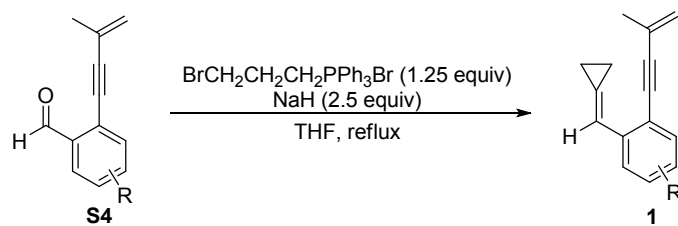

### Preparation of substrates **11-1v**

A solution of compound **S4** (1.0 equiv), (4-bromobutyl)triphenylphosphonium bromide (1.3 equiv) and  $\text{NaH}$  (2.6 equiv) in THF (25 mL) was stirred at 70 °C under  $\text{N}_2$  for 12 h. Upon completion, the reaction mixture was cooled to room temperature and the mixture was filtered through a celite. The filtrate was concentrated under reduced pressure and the residue was purified by a silica gel flash chromatography (eluent: petroleum ether) to afford the products **11-1v** in moderate yields.

## 2 Copies of NMR spectra of all compounds

### 1-(cyclopropylidene(phenyl)methyl)-2-(3-methylbut-3-en-1-yn-1-yl)benzene (1a)

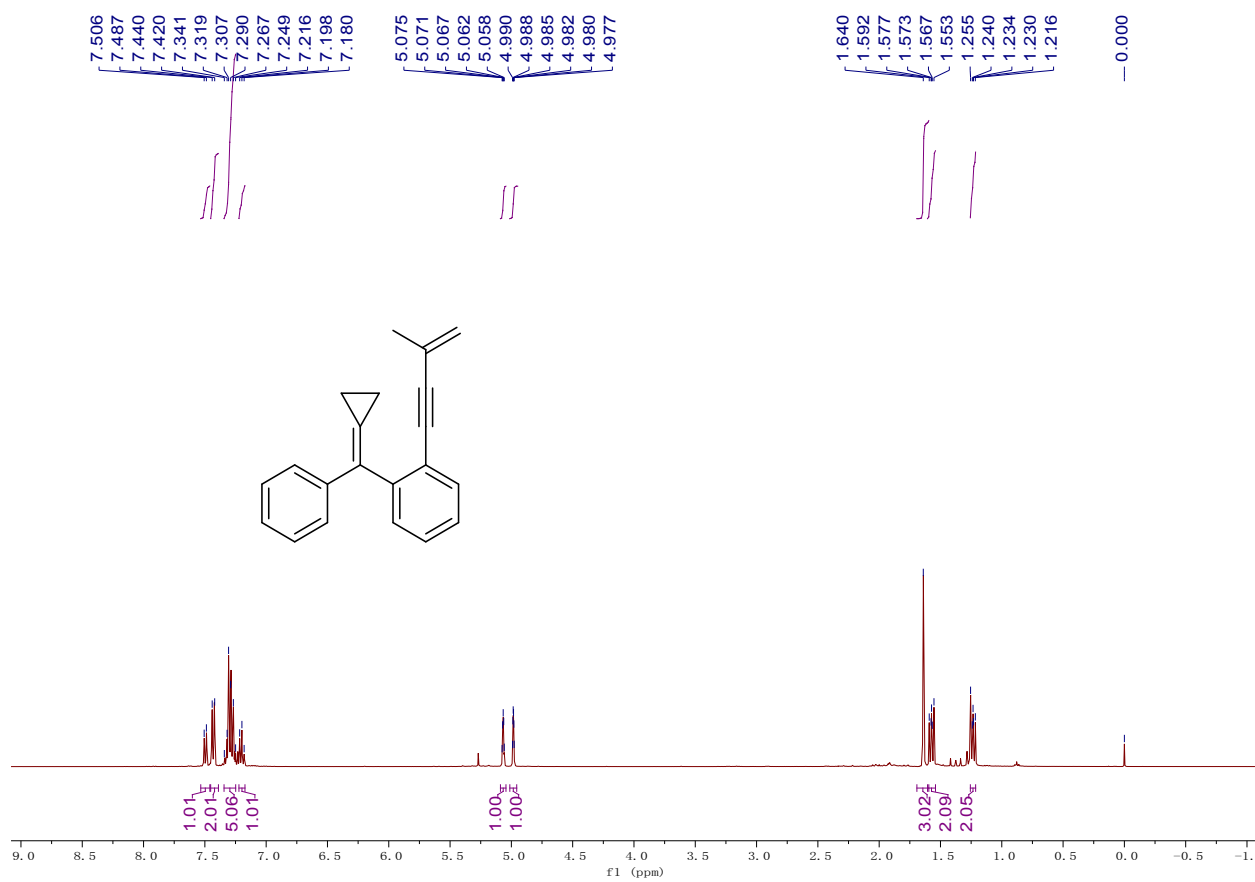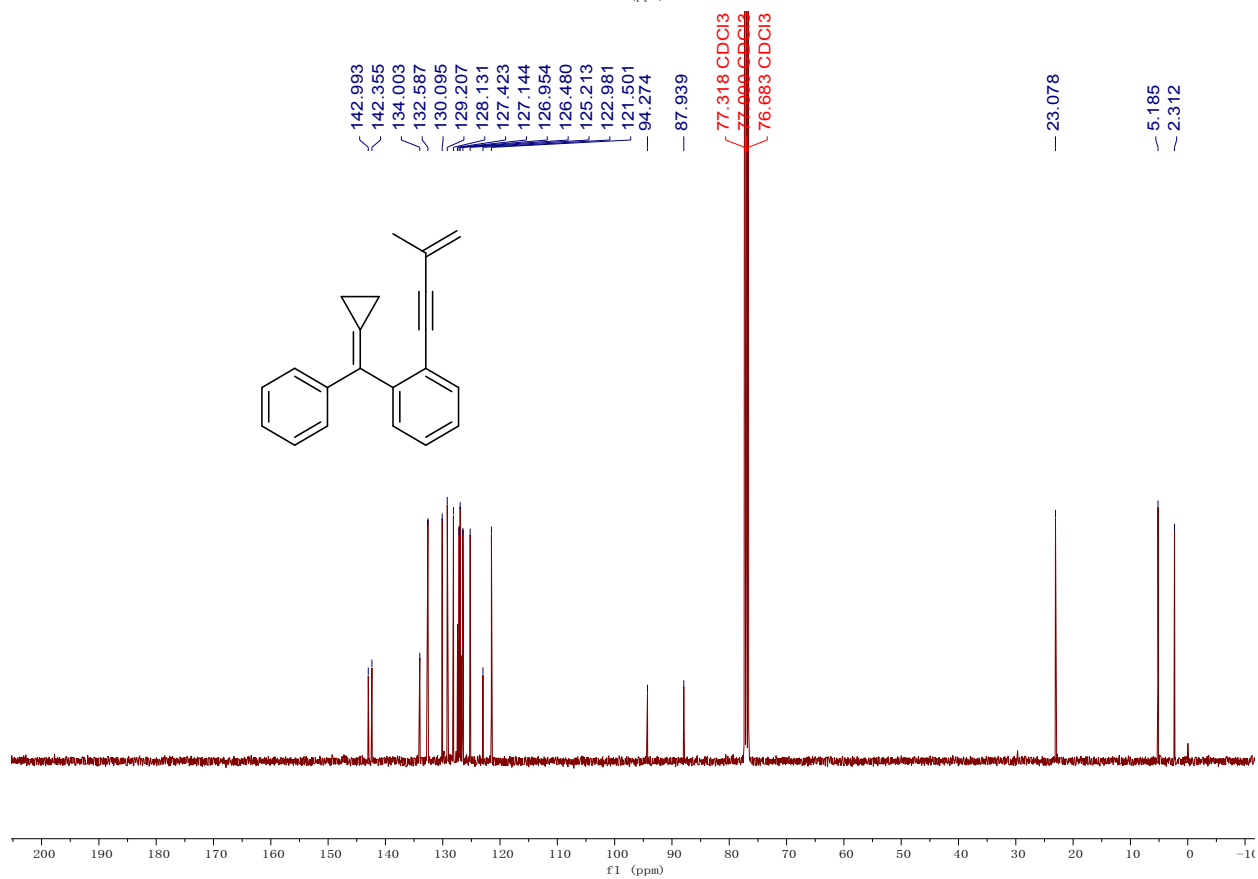

1-((4-chlorophenyl)(cyclopropylidene)methyl)-2-(3-methylbut-3-en-1-yn-1-yl)benzene (1b)

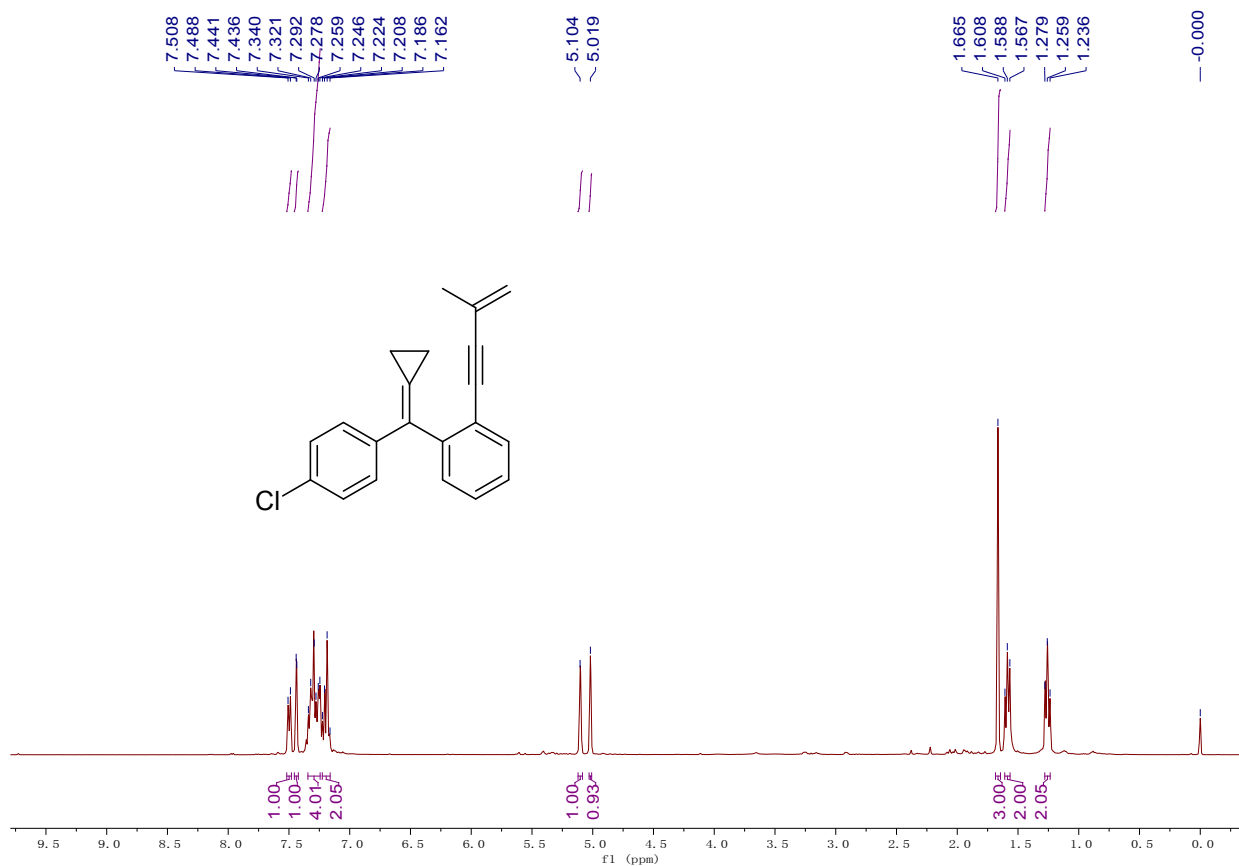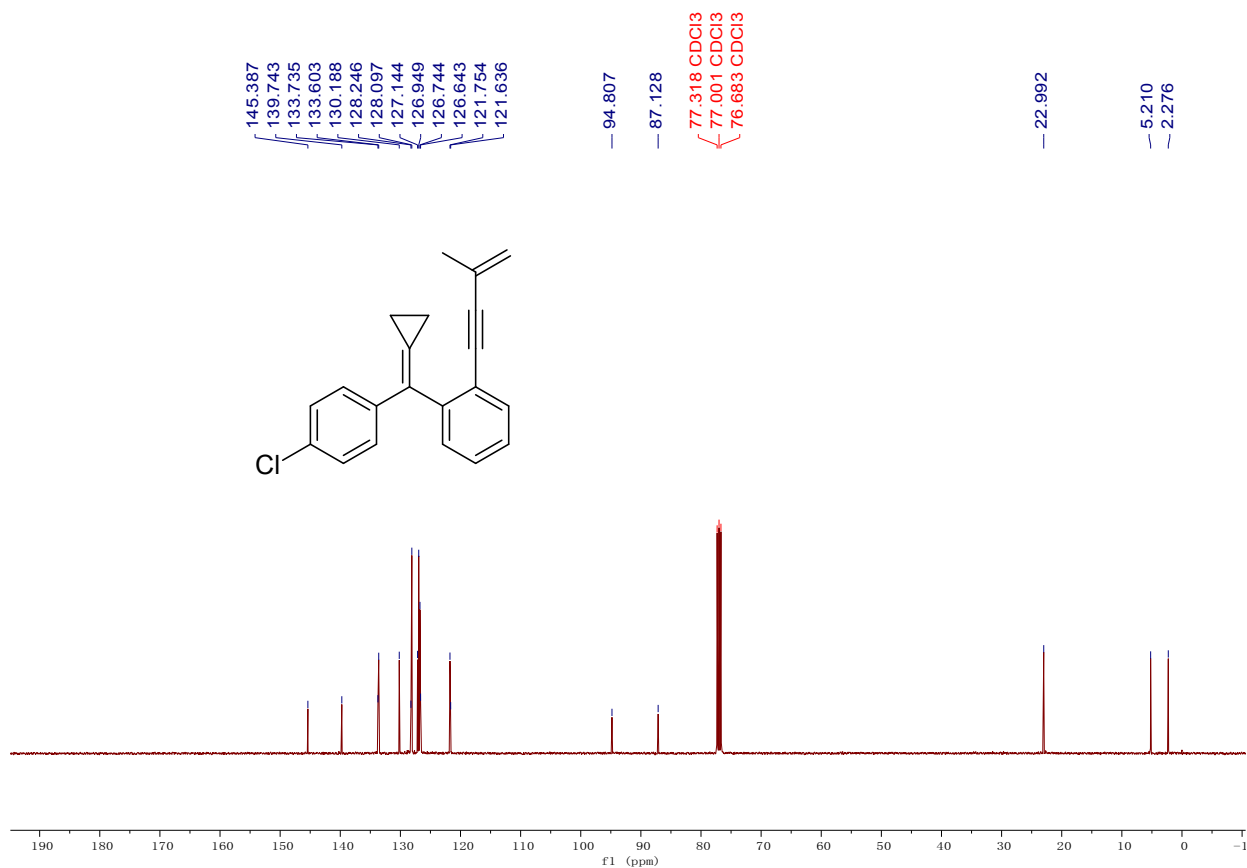

1-((4-(*tert*-butyl)phenyl)(cyclopropylidene)methyl)-2-(3-methylbut-3-en-1-yn-1-yl)benzene (1c)

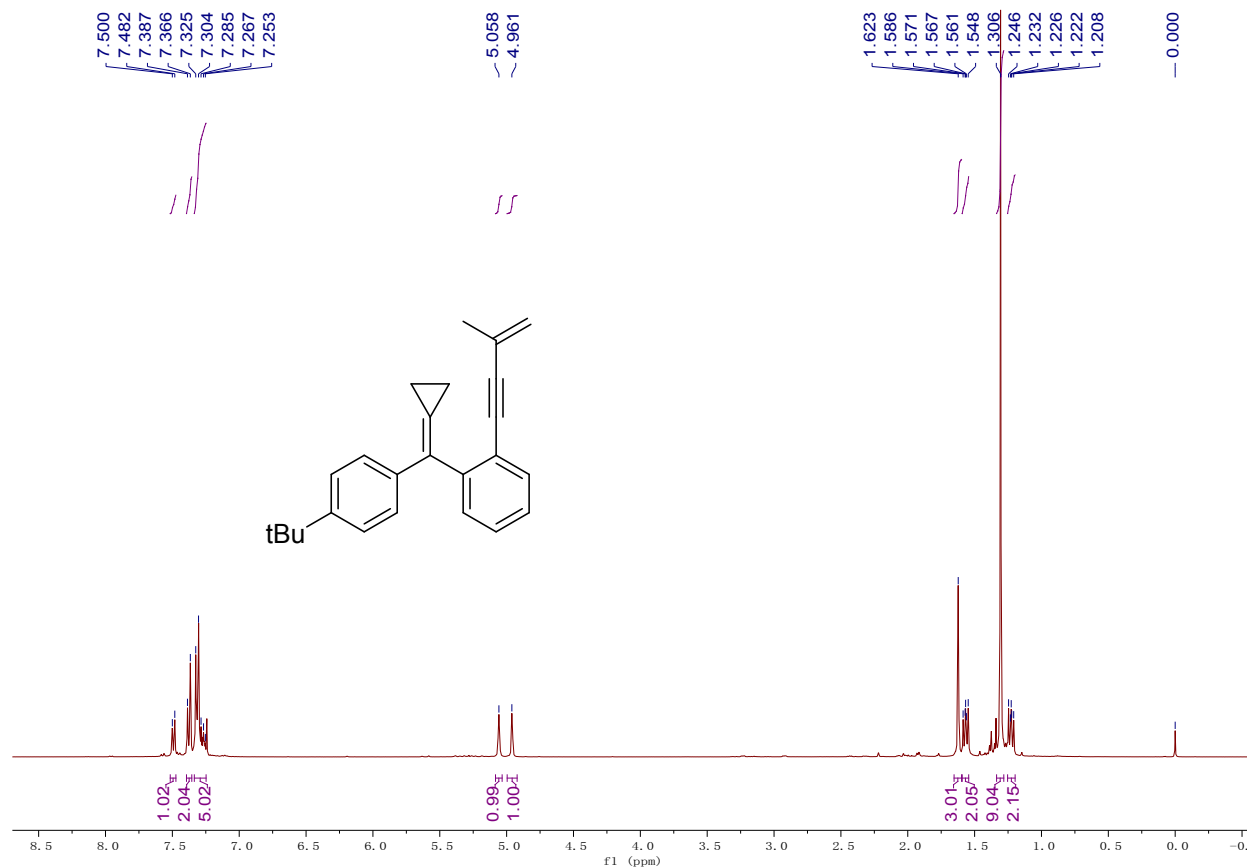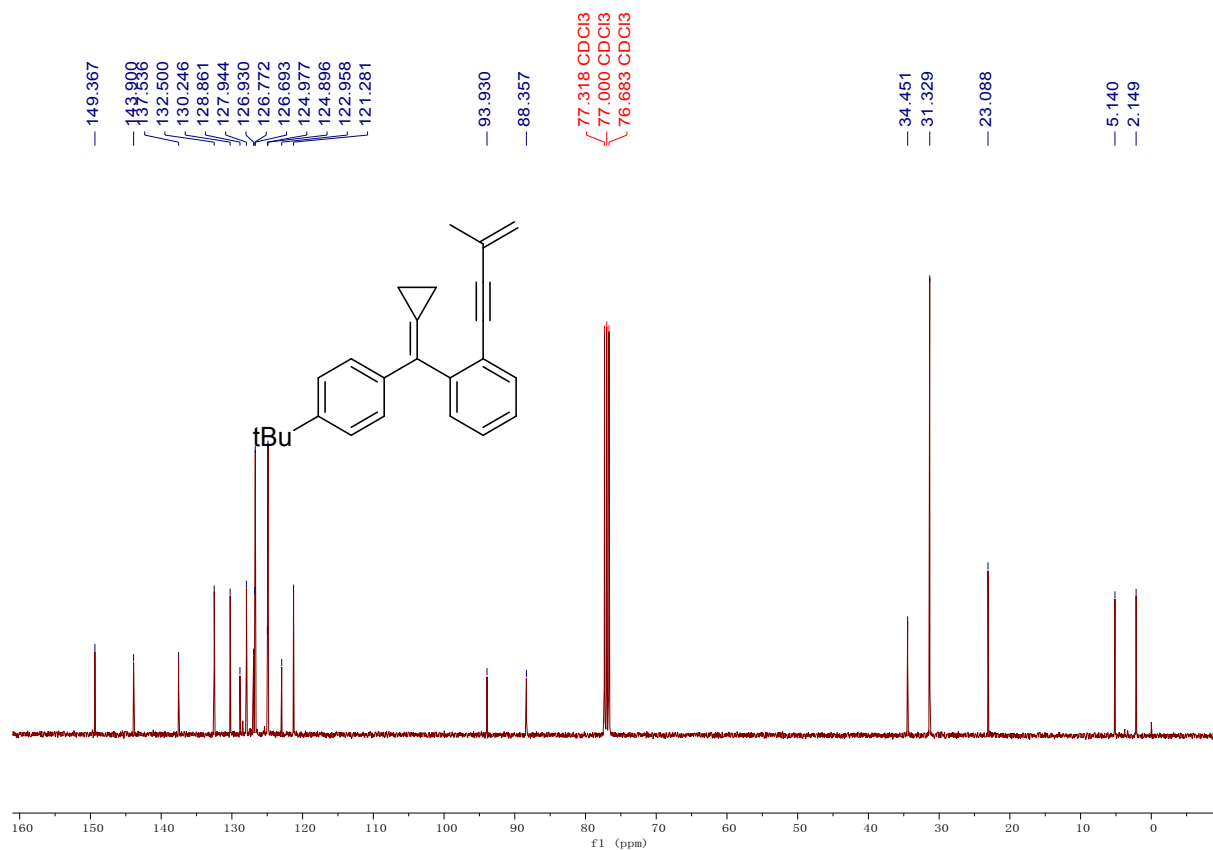

# 4-(cyclopropylidene(2-(3-methylbut-3-en-1-yn-1-yl)phenyl)methyl)-1,1'-biphenyl (1d)

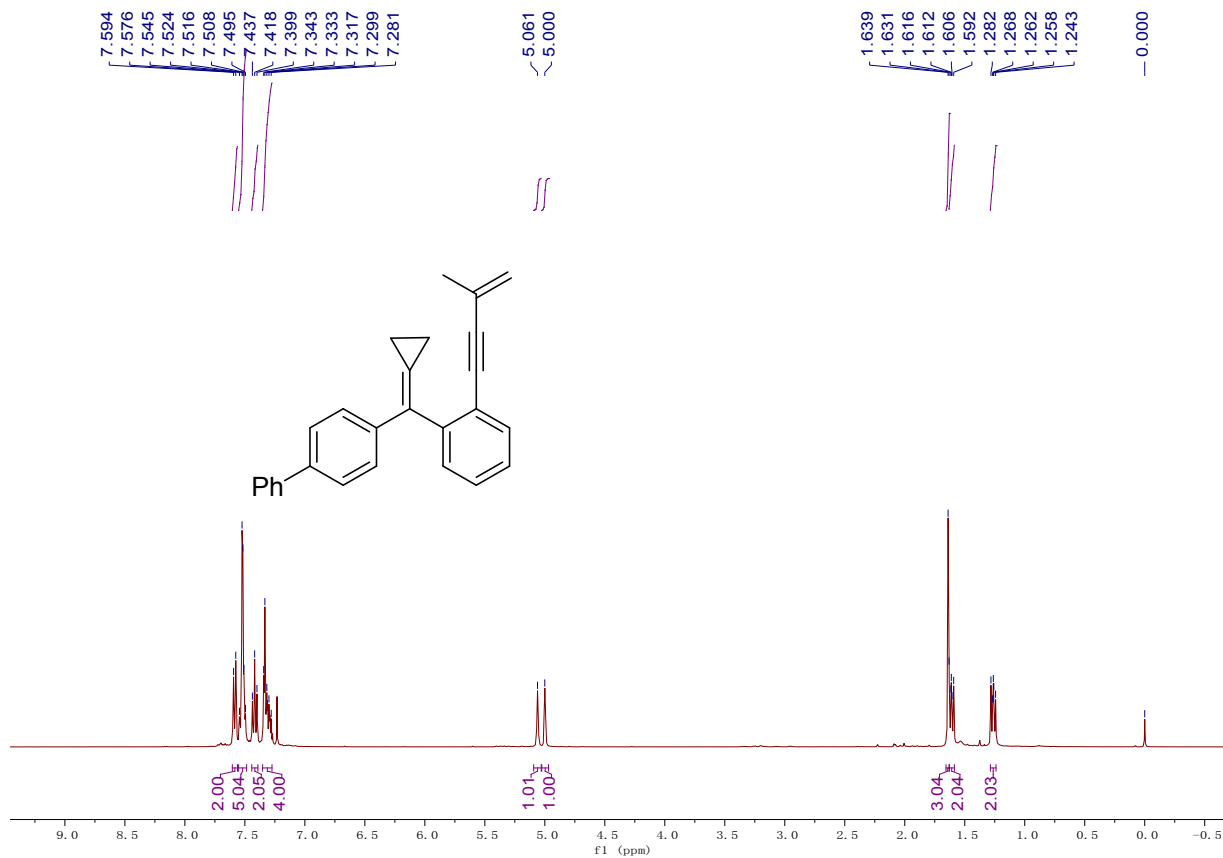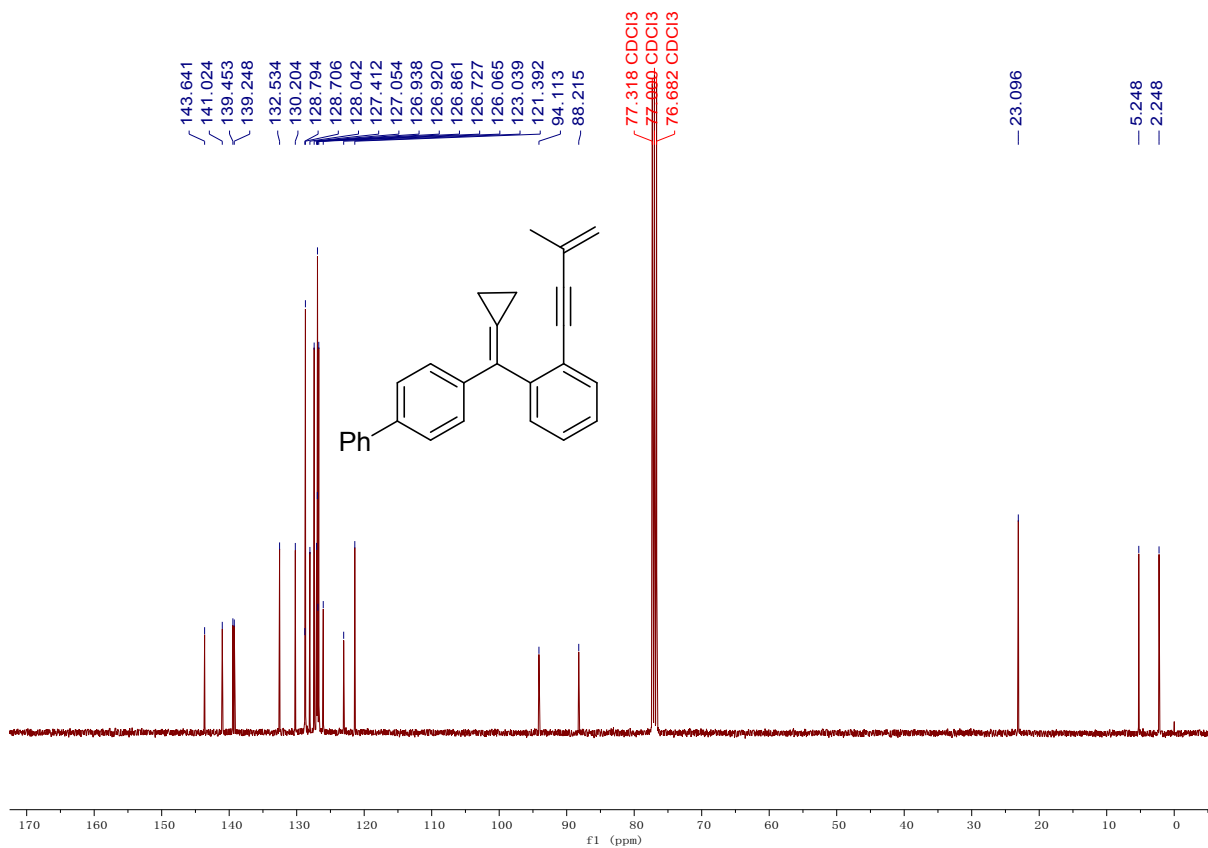



# 1-(cyclopropylidene(*p*-tolyl)methyl)-2-(3-methylbut-3-en-1-yn-1-yl)benzene (1e)

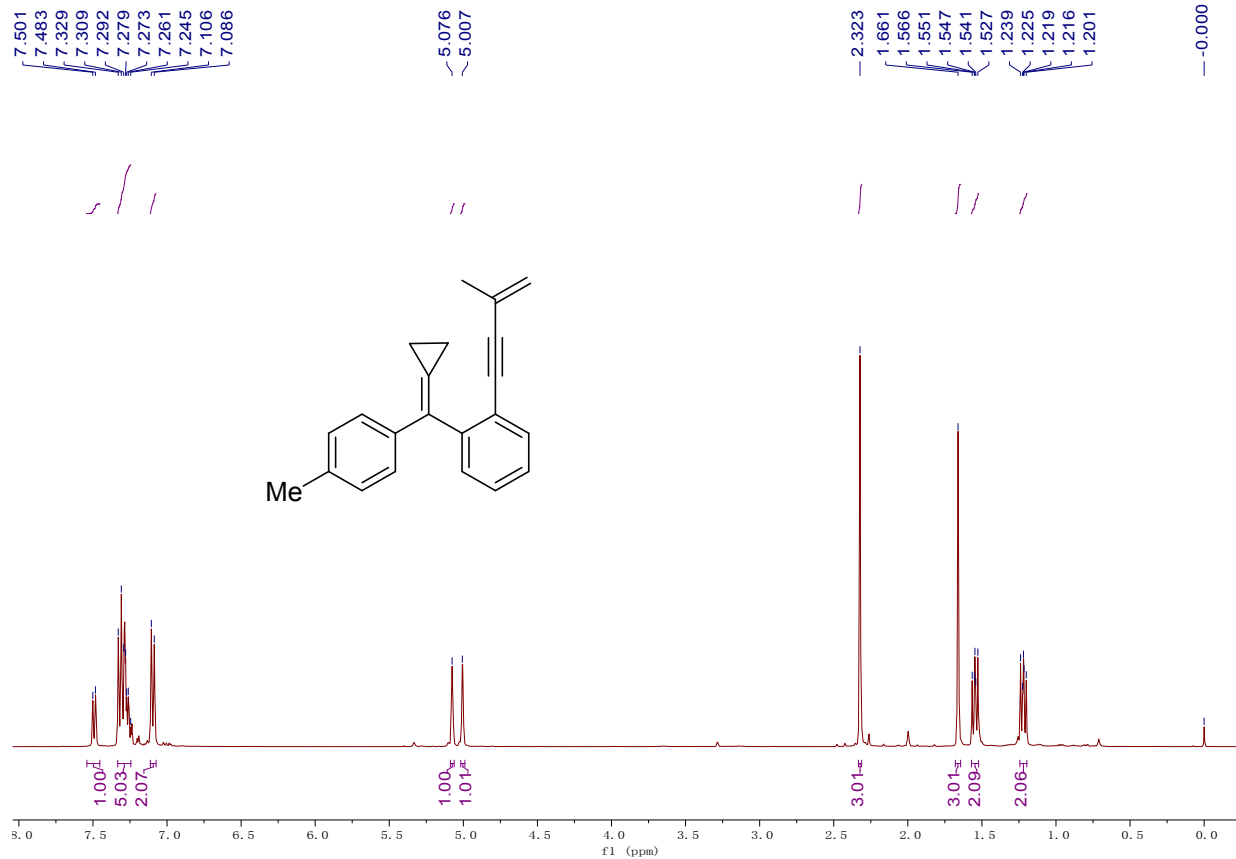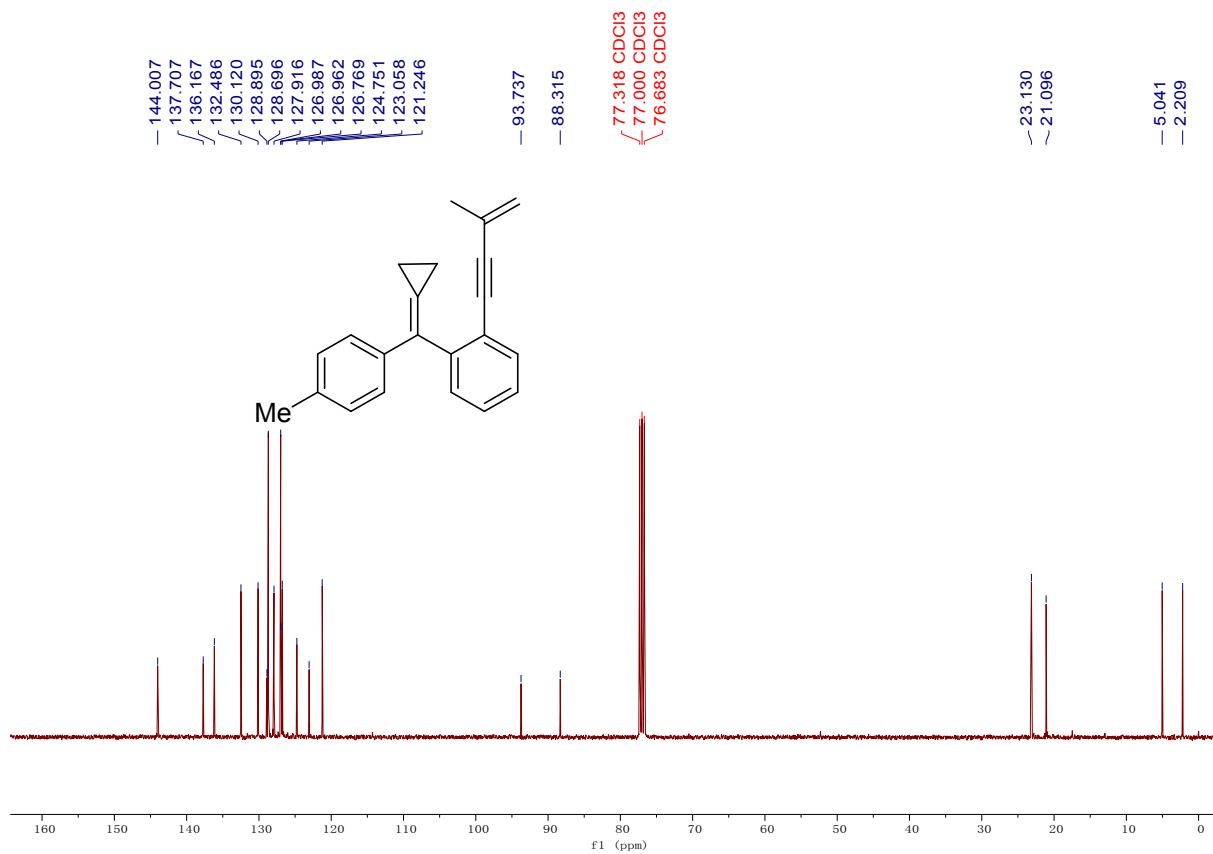

**1-((3-chlorophenyl)(cyclopropylidene)methyl)-2-(3-methylbut-3-en-1-yn-1-yl)benzene (1f)**

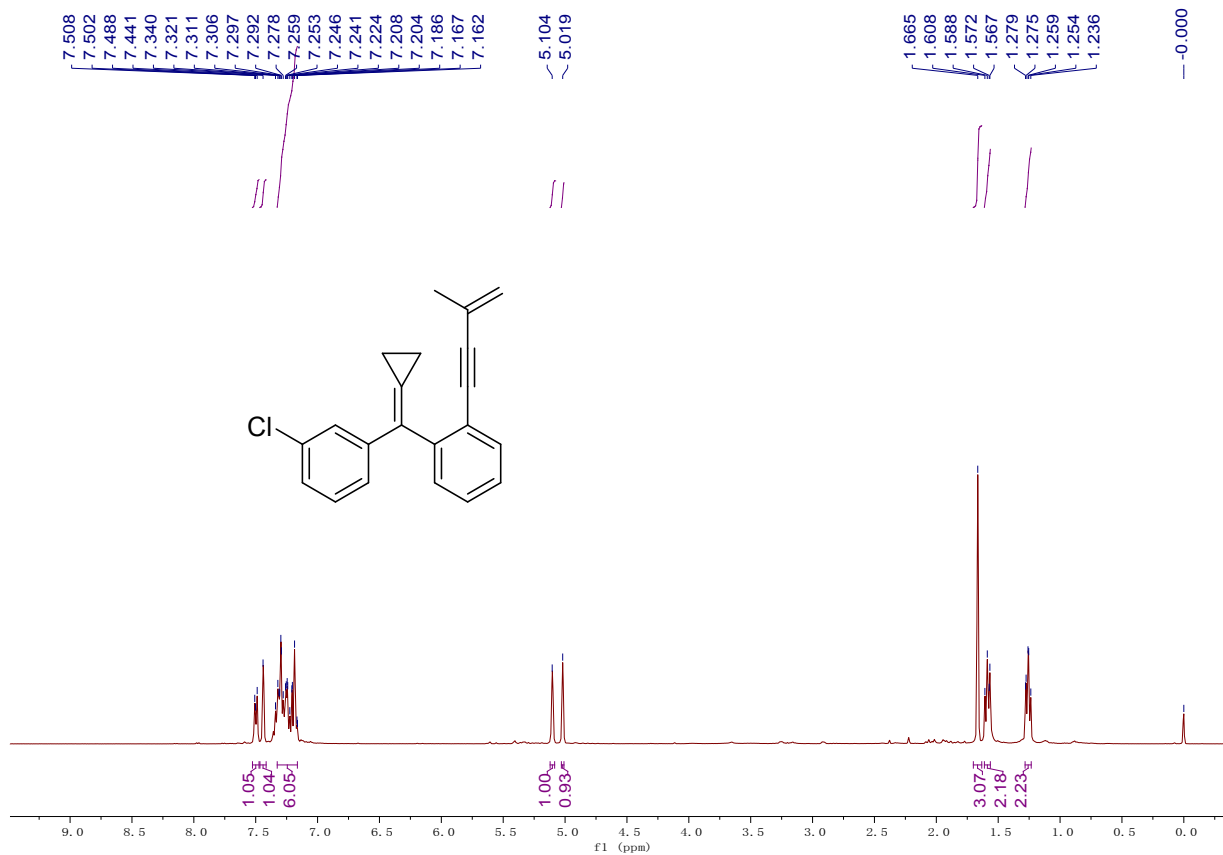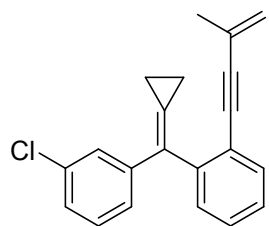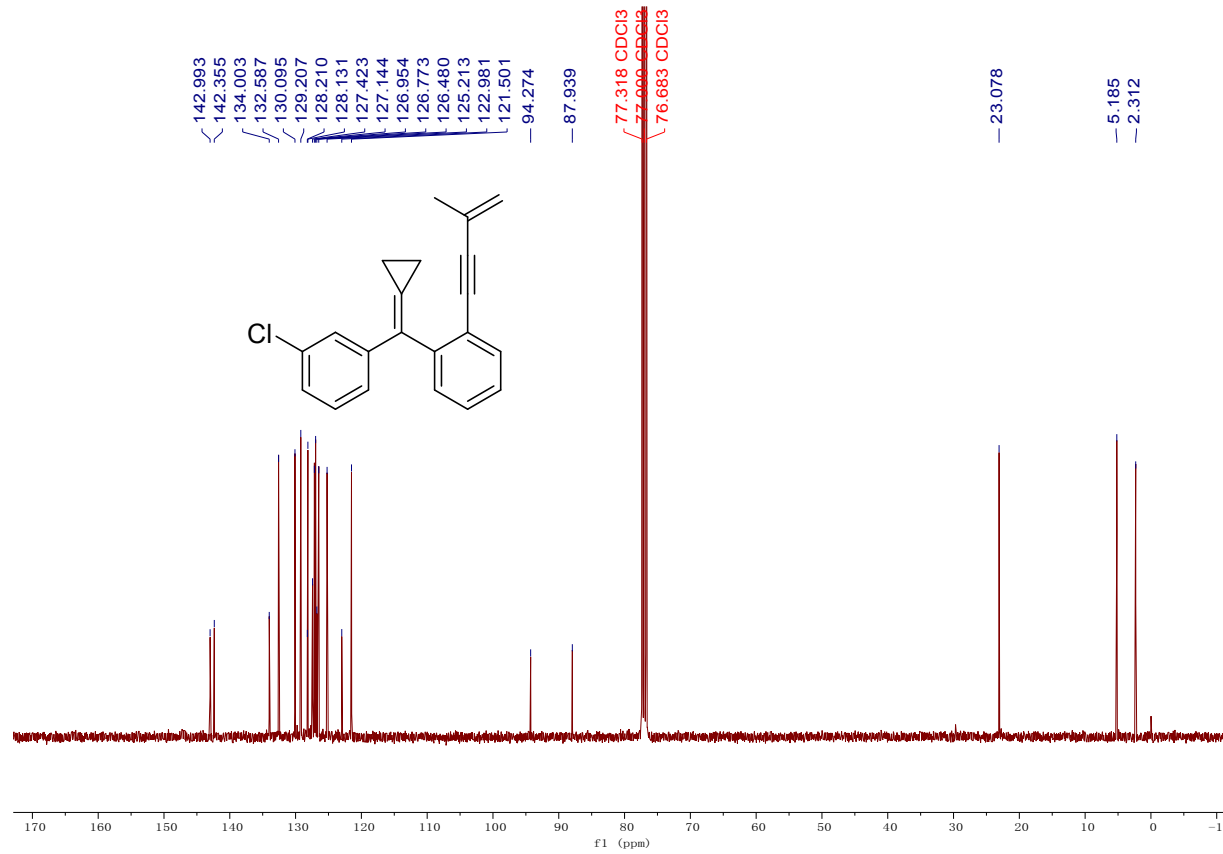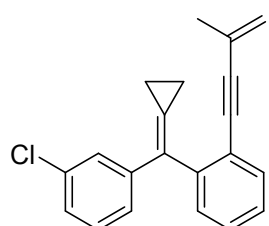

1-(cyclopropylidene(*m*-tolyl)methyl)-2-(3-methylbut-3-en-1-yn-1-yl)benzene (1g)

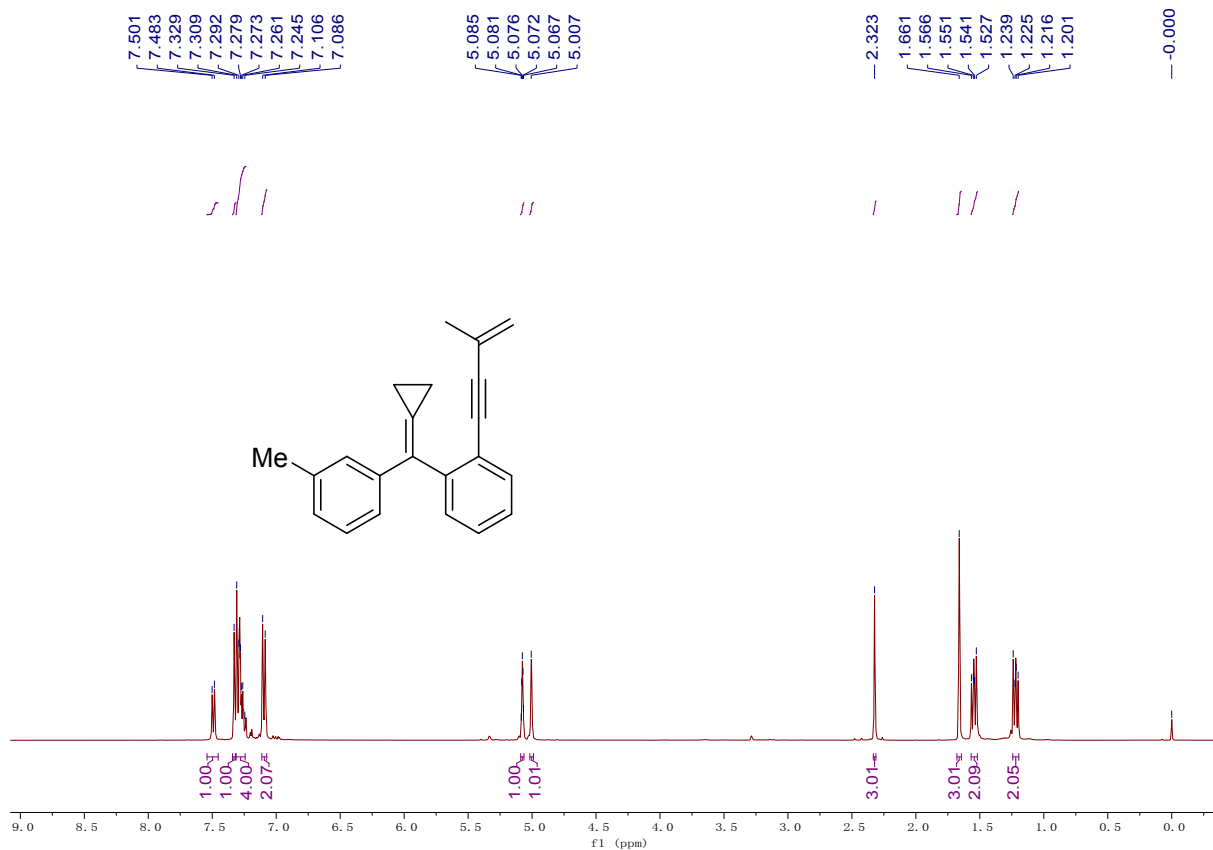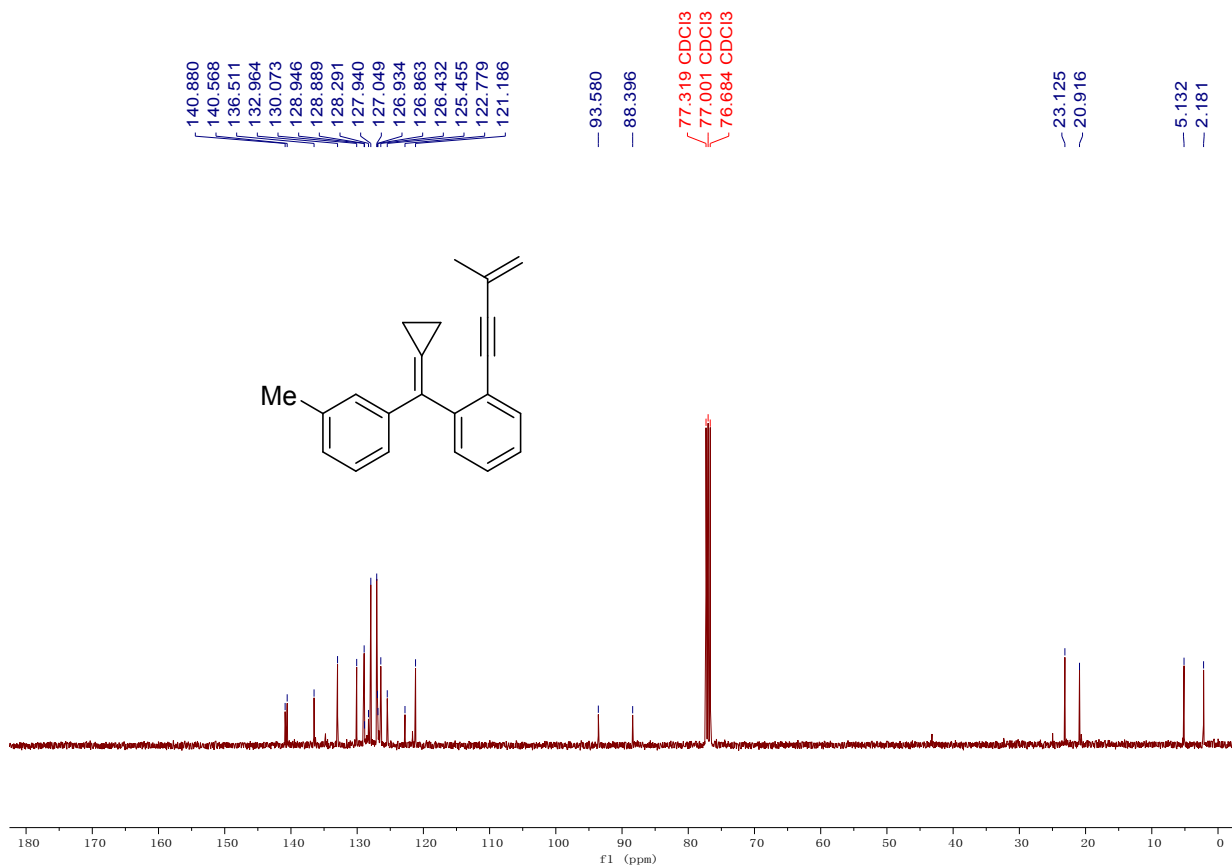

**4-chloro-2-(cyclopropylidene(phenyl)methyl)-1-(3-methylbut-3-en-1-yn-1-yl)benzene (1h)**

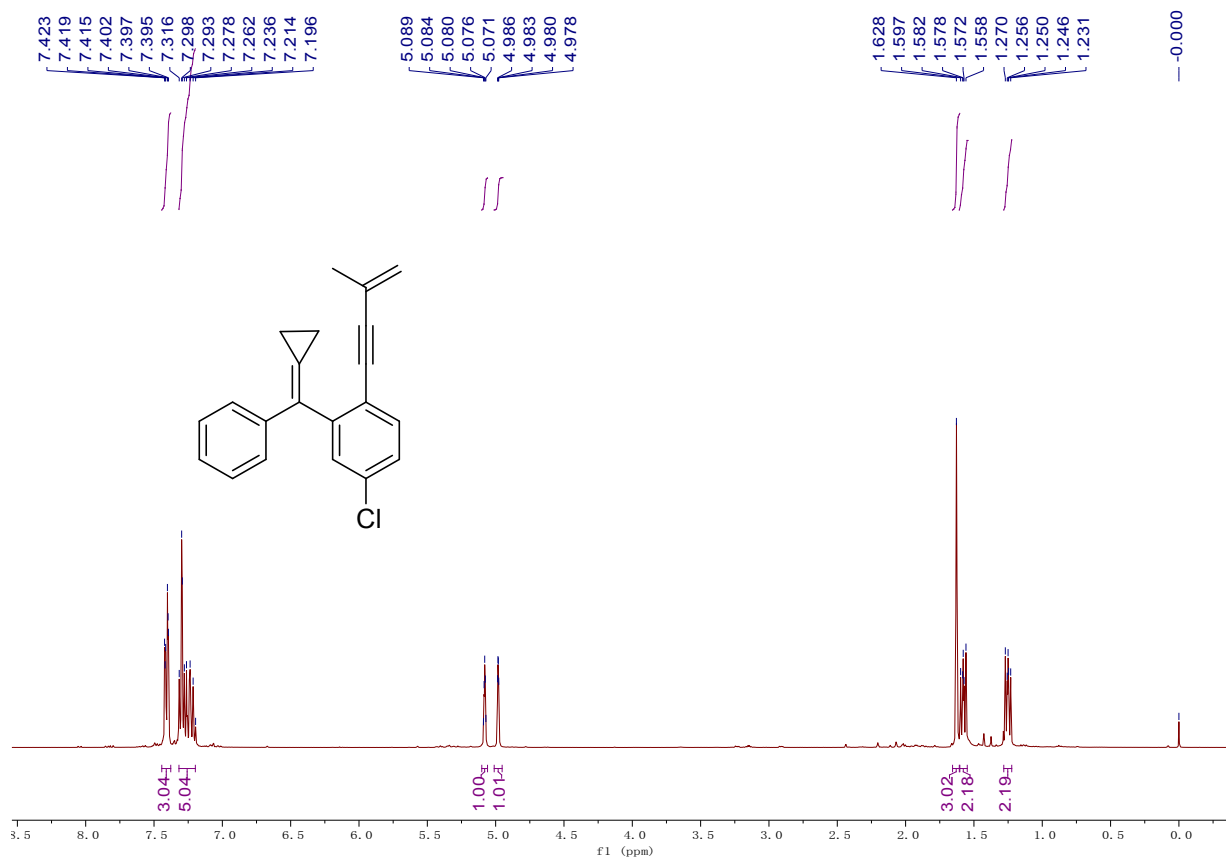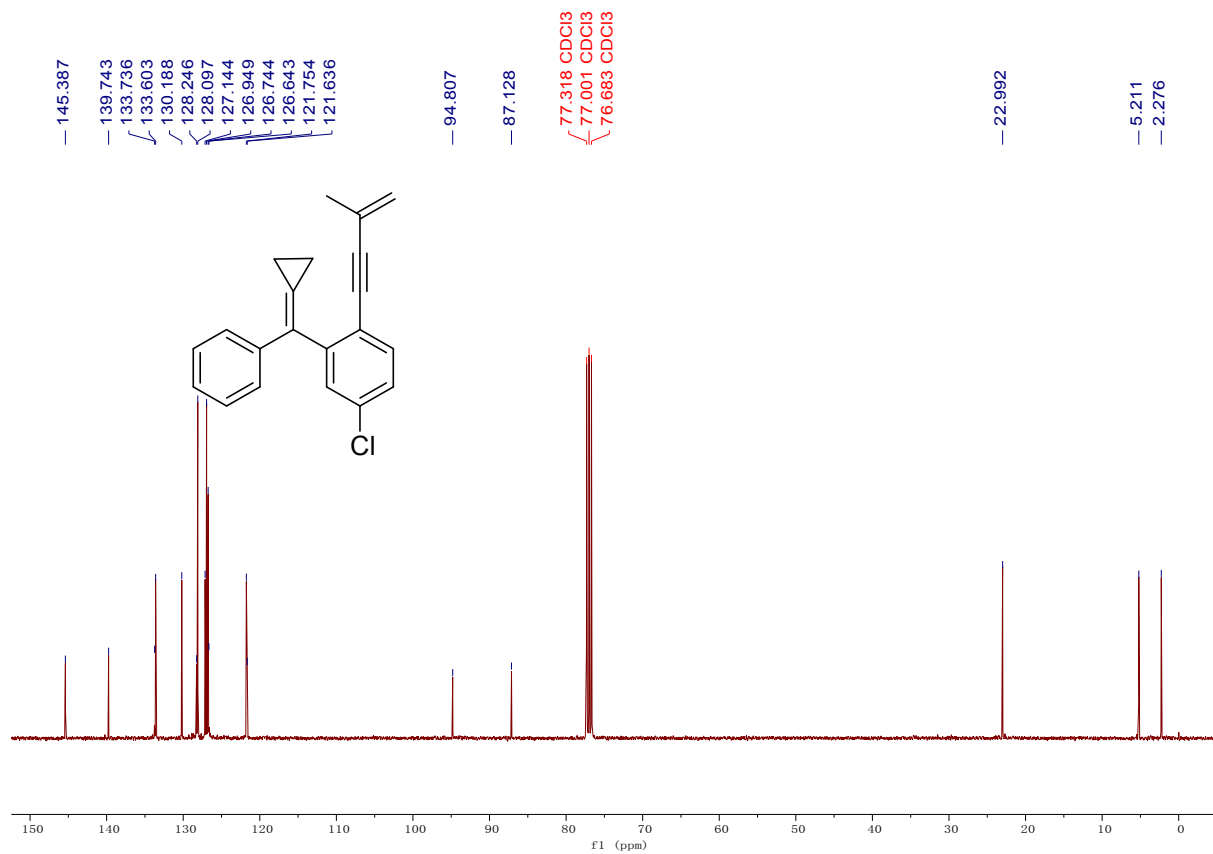

4-chloro-2-(cyclopropylidene(2-fluorophenyl)methyl)-1-(3-methylbut-3-en-1-yn-1-yl)benzene

(1i)

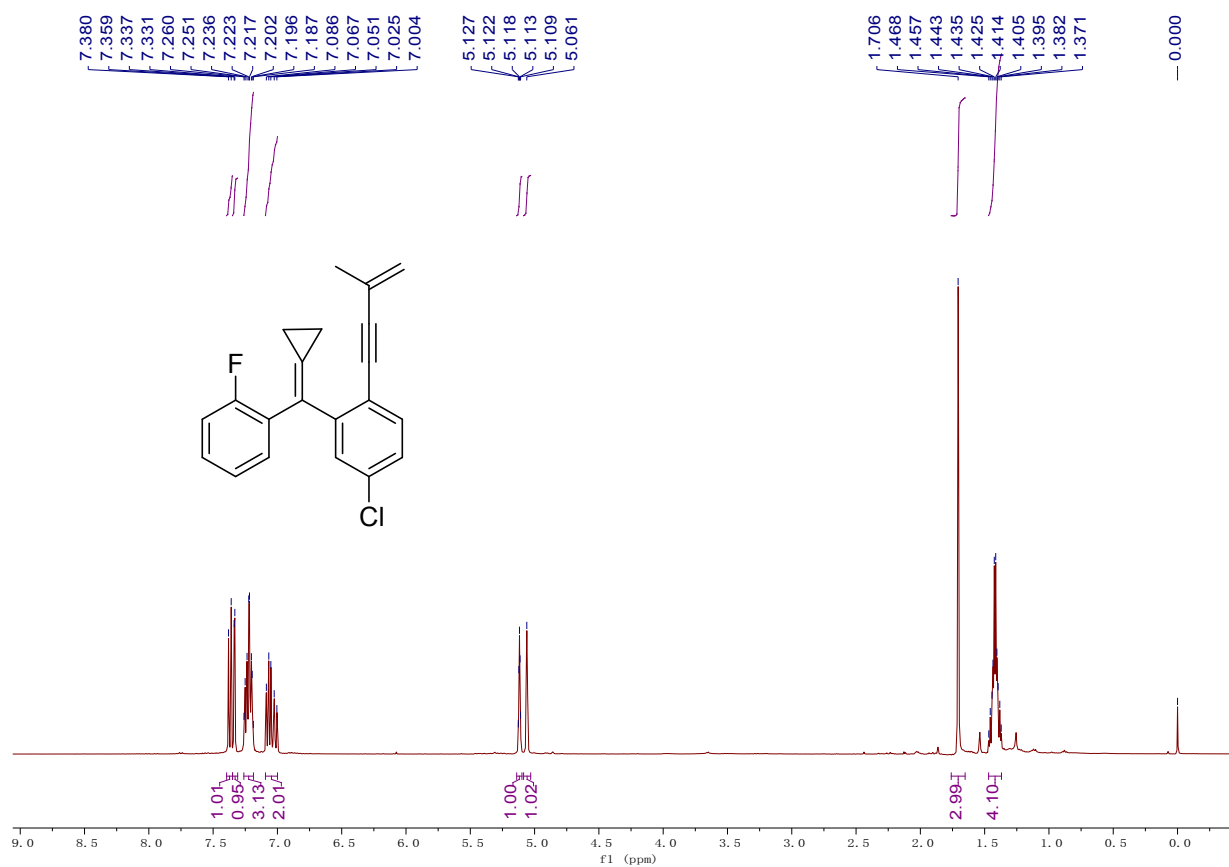

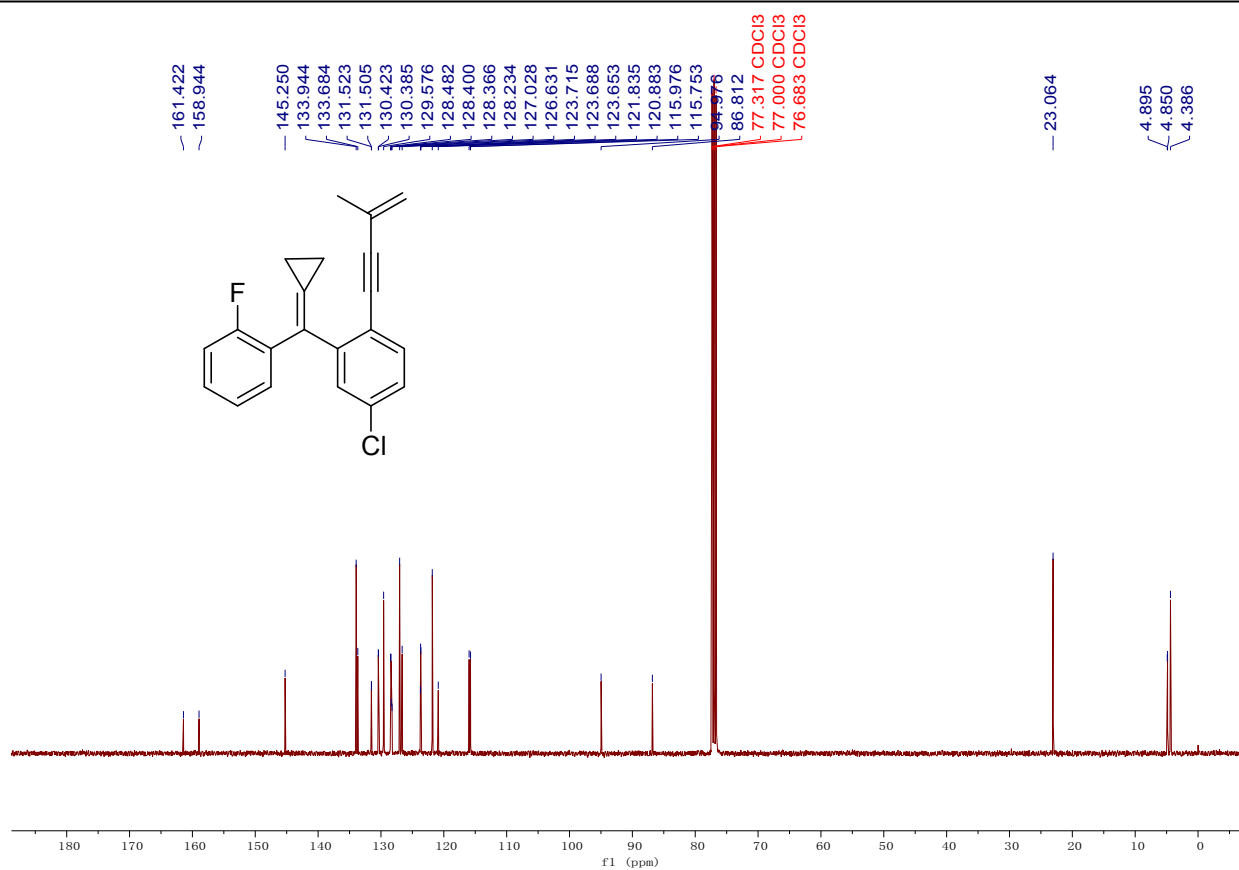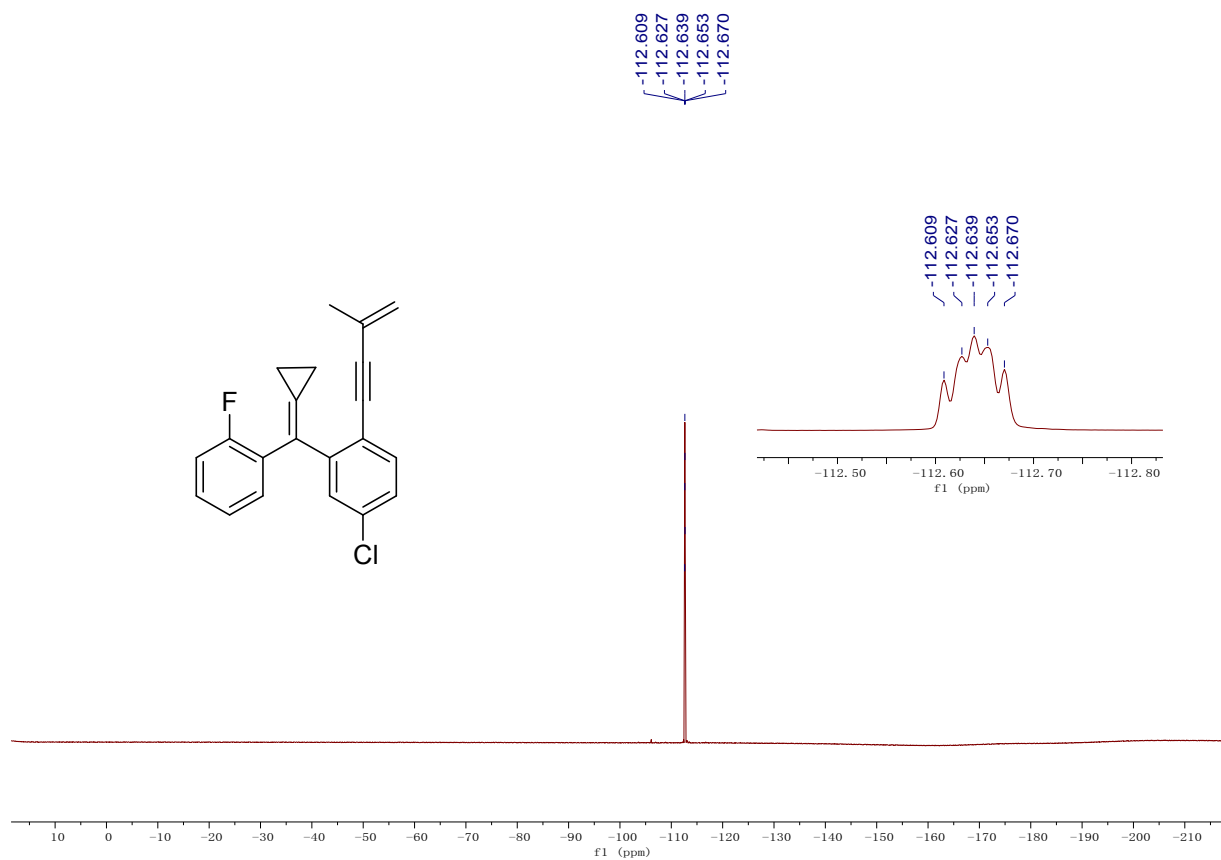

4-chloro-2-((2-chlorophenyl)(cyclopropylidene)methyl)-1-(3-methylbut-3-en-1-yn-1-

yl)benzene(1j)

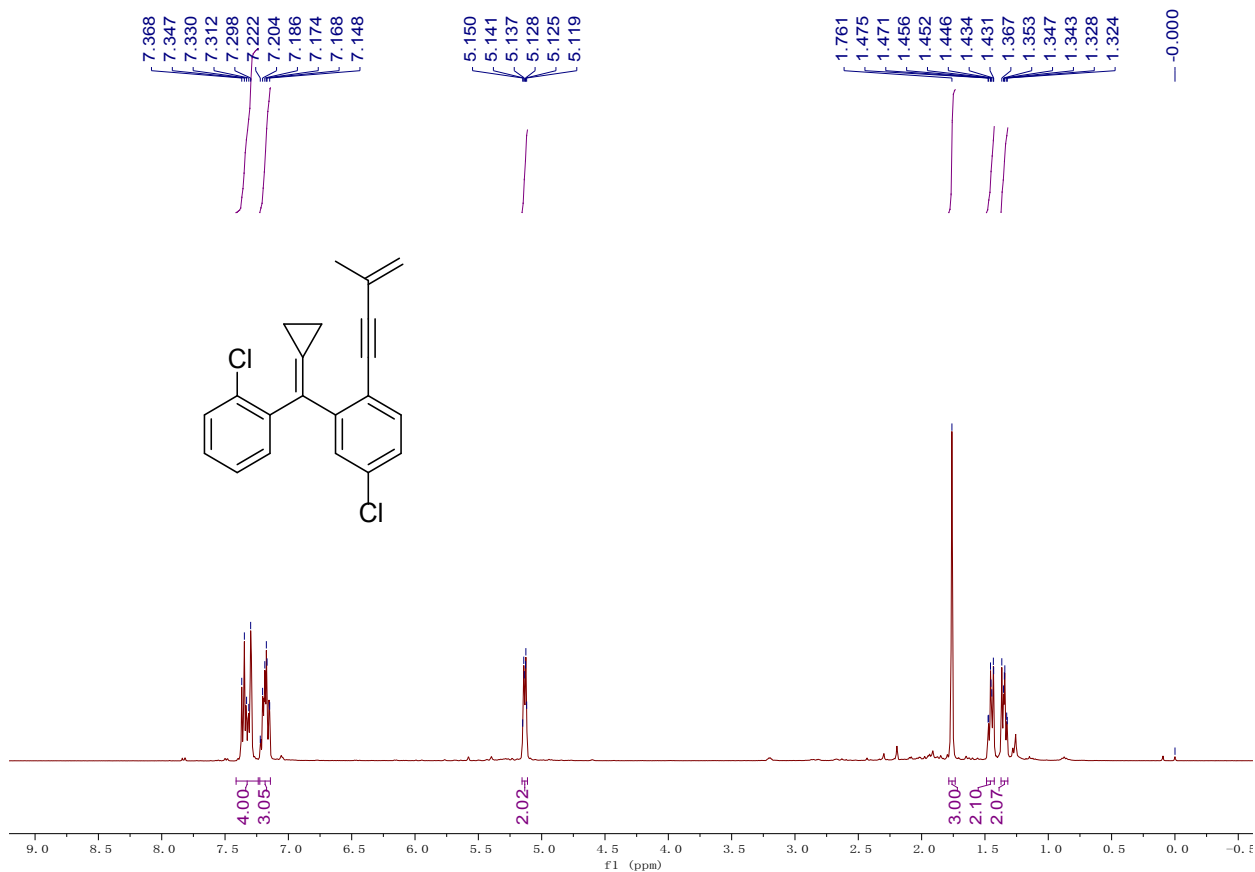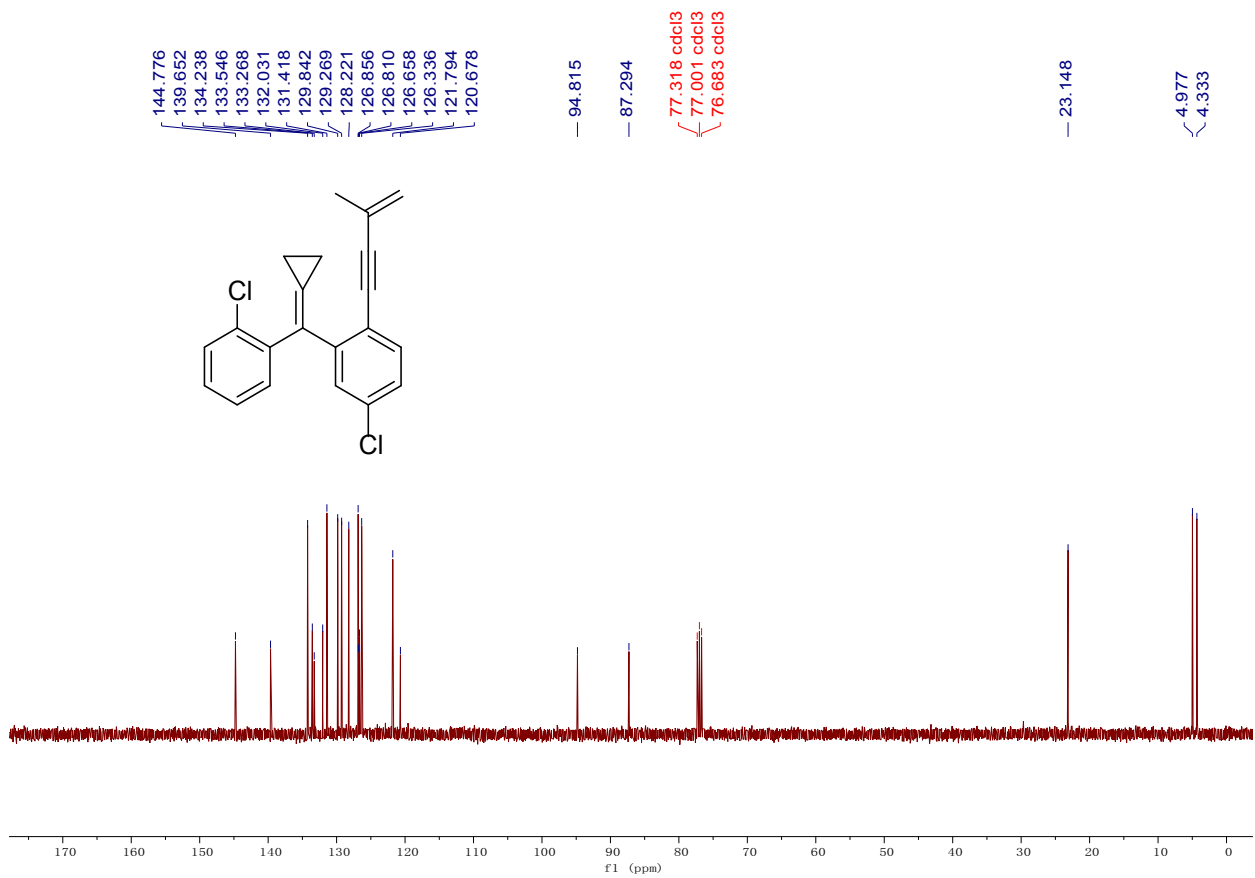

# 1-(cyclopropylidene(phenyl)methyl)-4-methyl-2-(3-methylbut-3-en-1-yn-1-yl)benzene (1k)

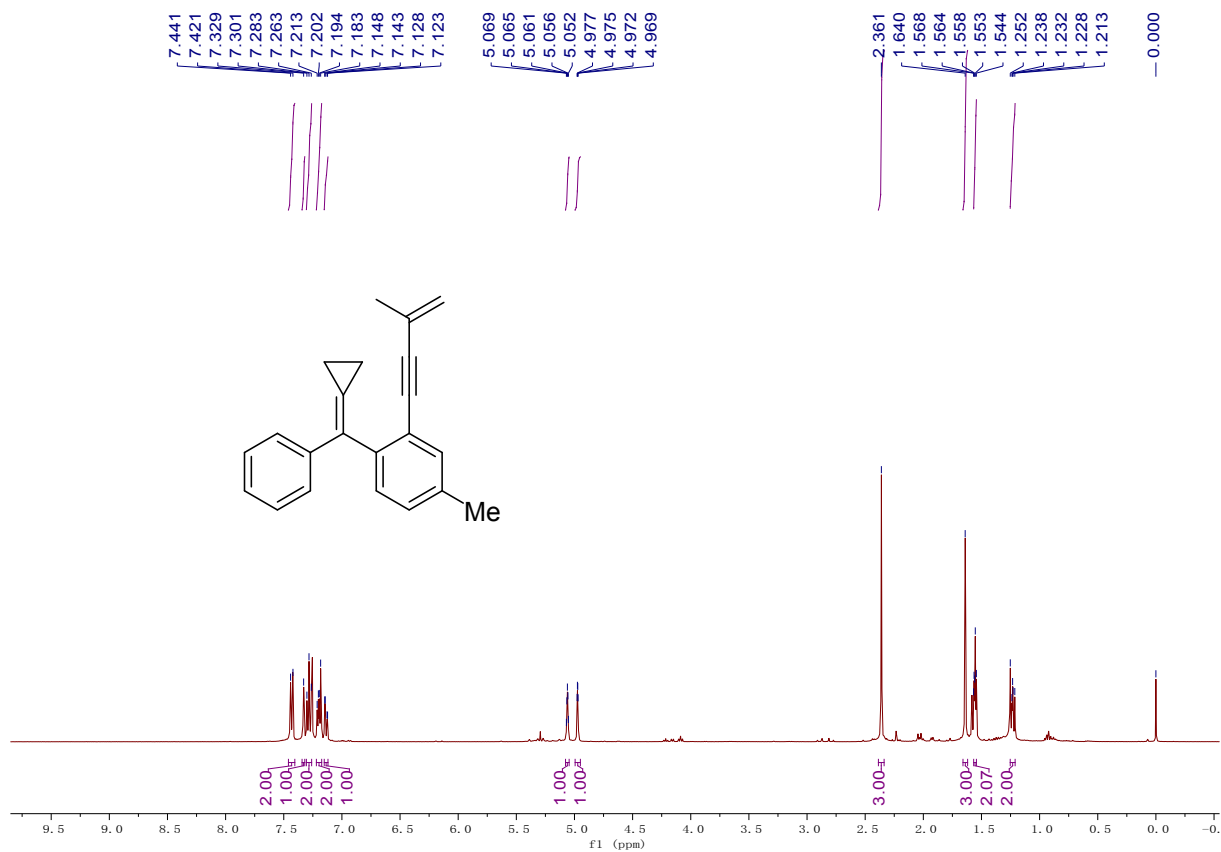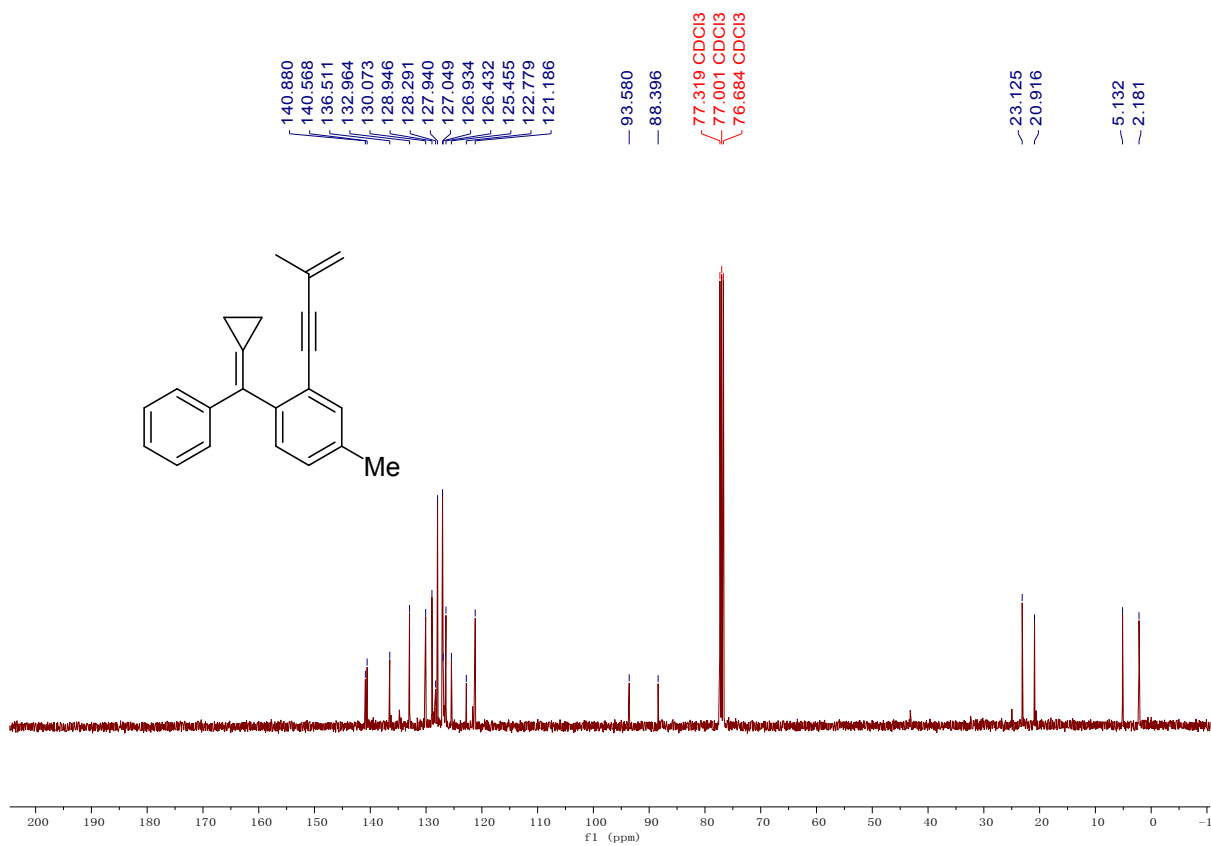



# 1-(cyclopropylidenemethyl)-2-(3-methylbut-3-en-1-yn-1-yl)benzene (11)

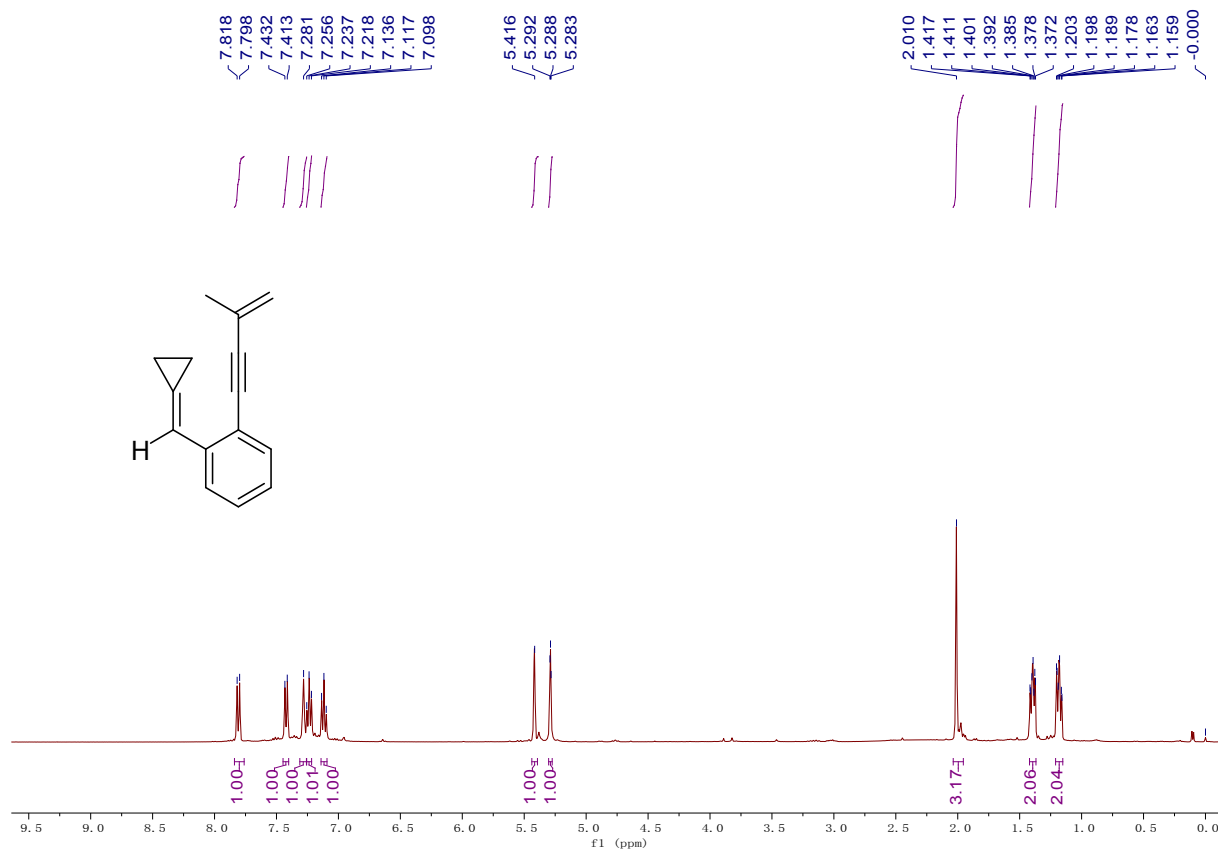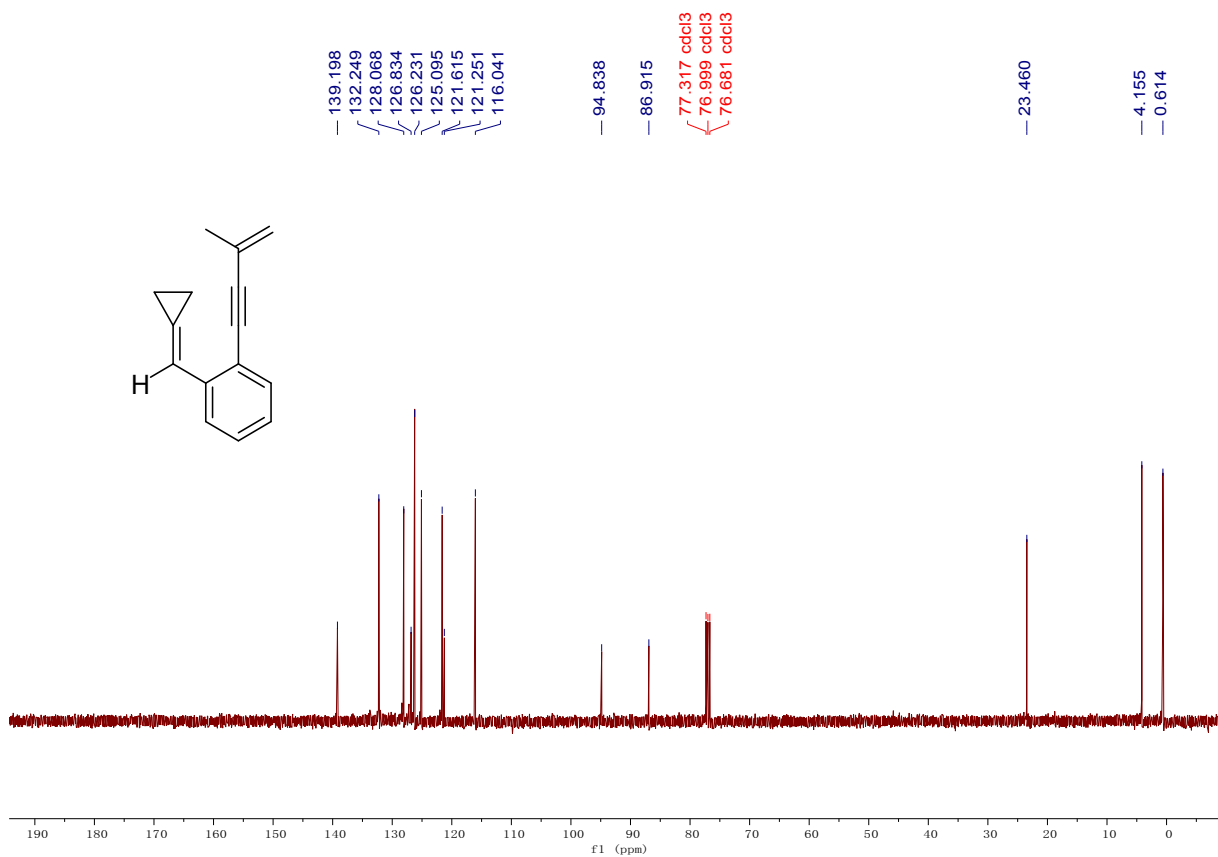

## 2-(cyclopropylidenemethyl)-1-fluoro-3-(3-methylbut-3-en-1-yn-1-yl)benzene (1m)

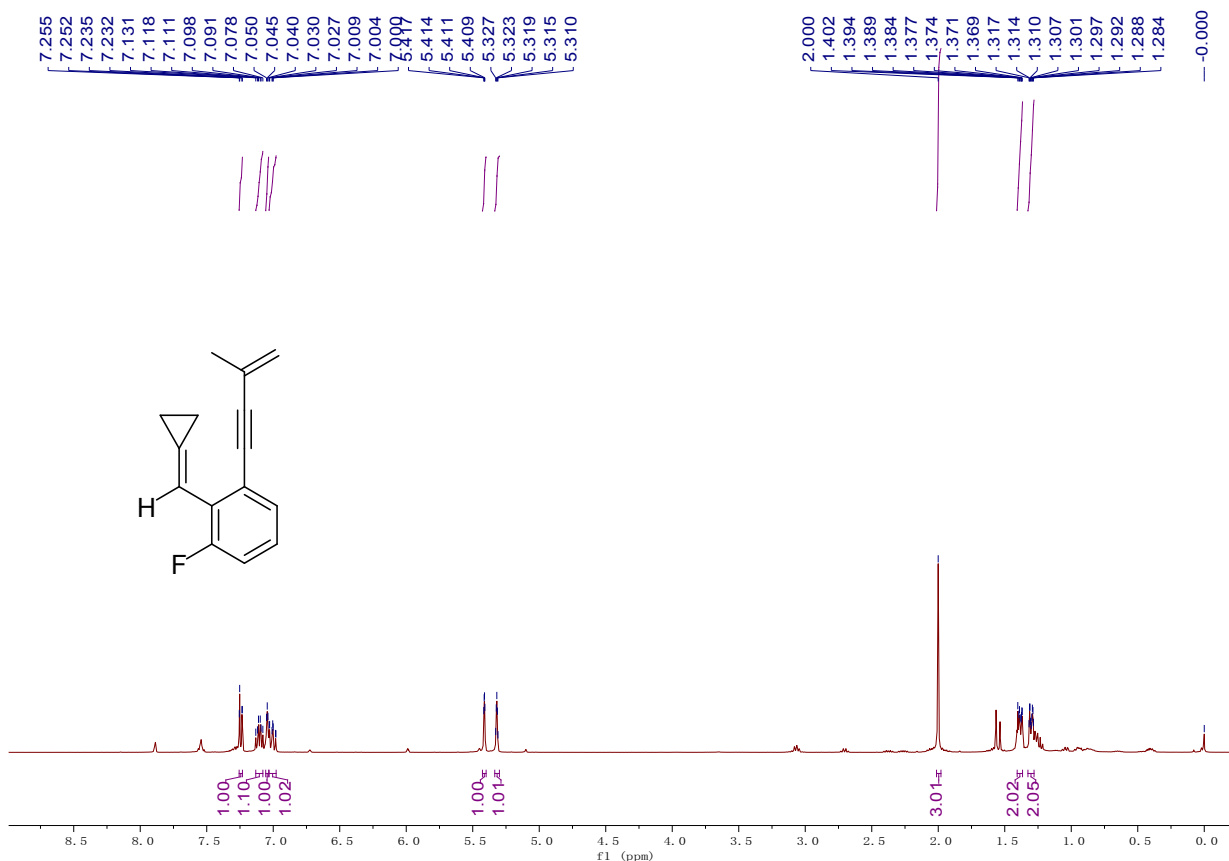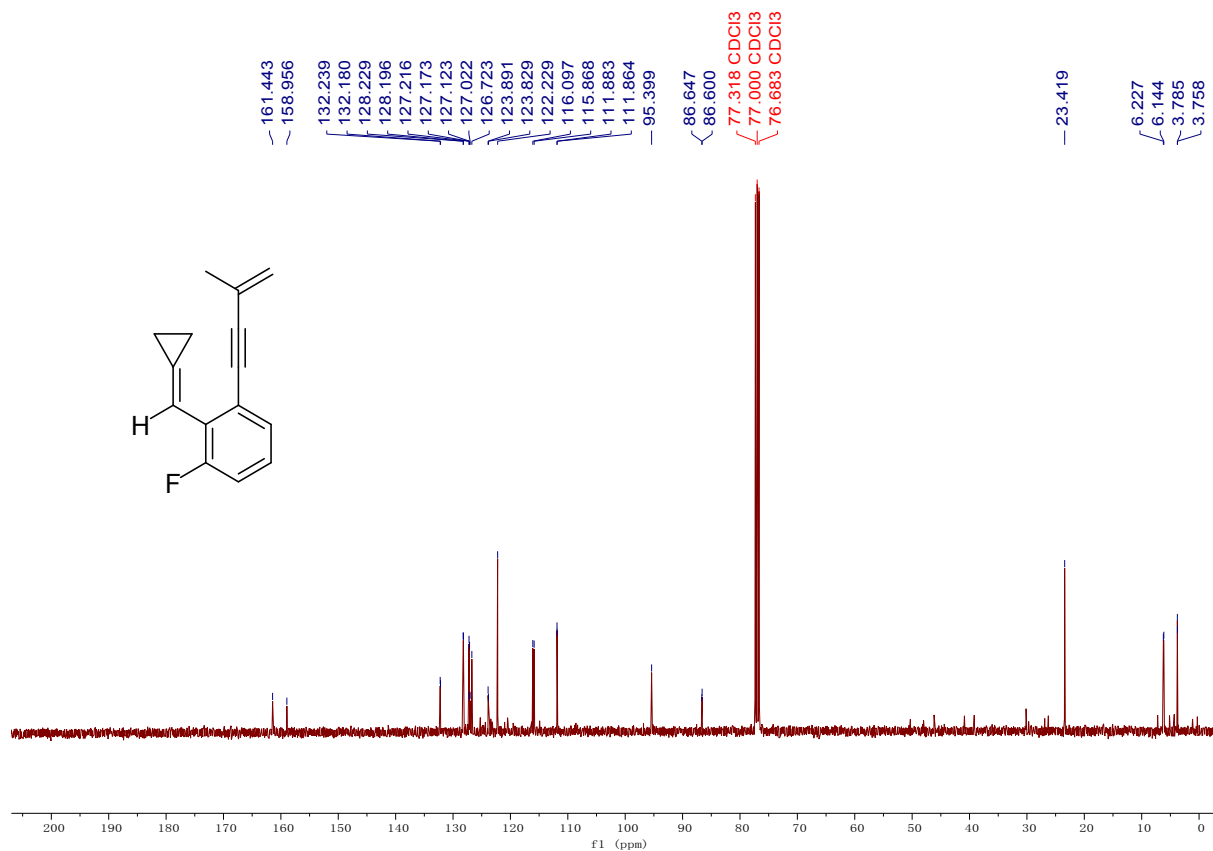

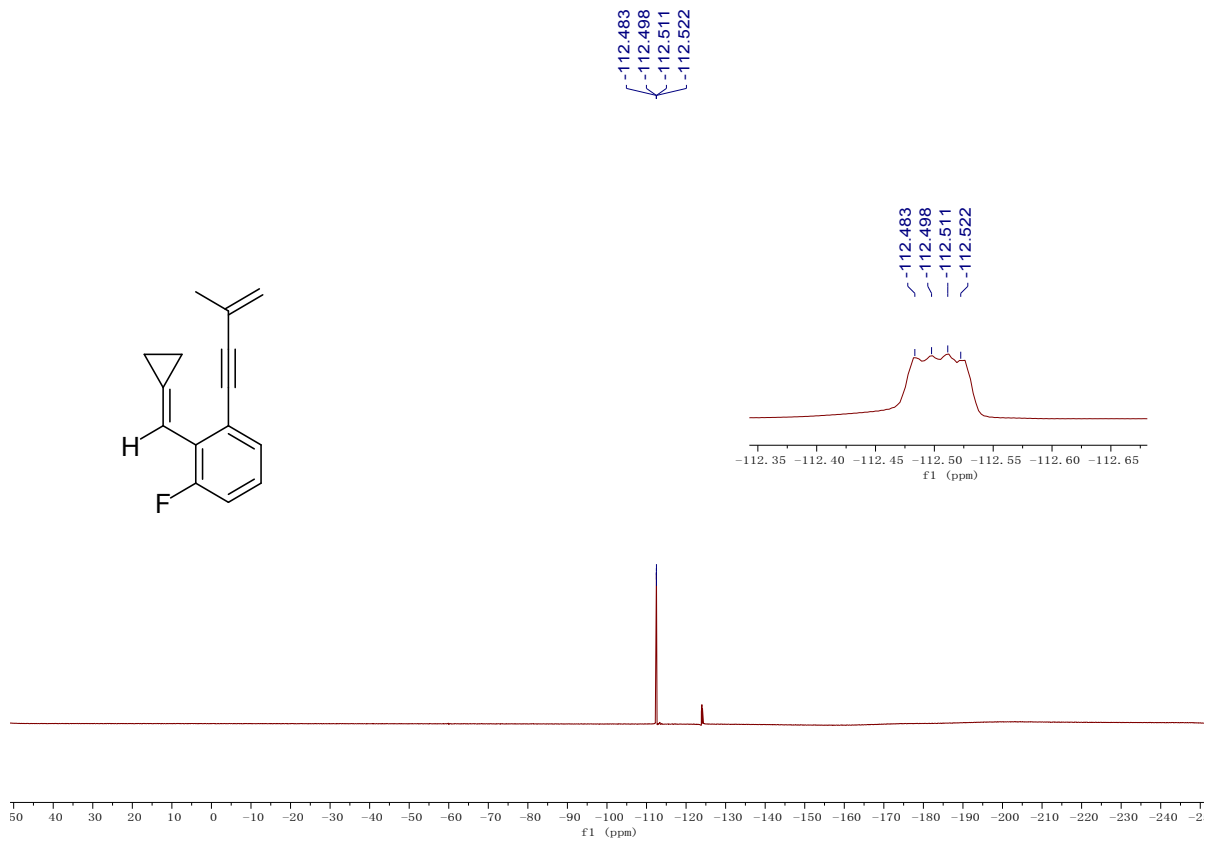

# 1-chloro-3-(cyclopropylidenemethyl)-2-(3-methylbut-3-en-1-yn-1-yl)benzene (1n)

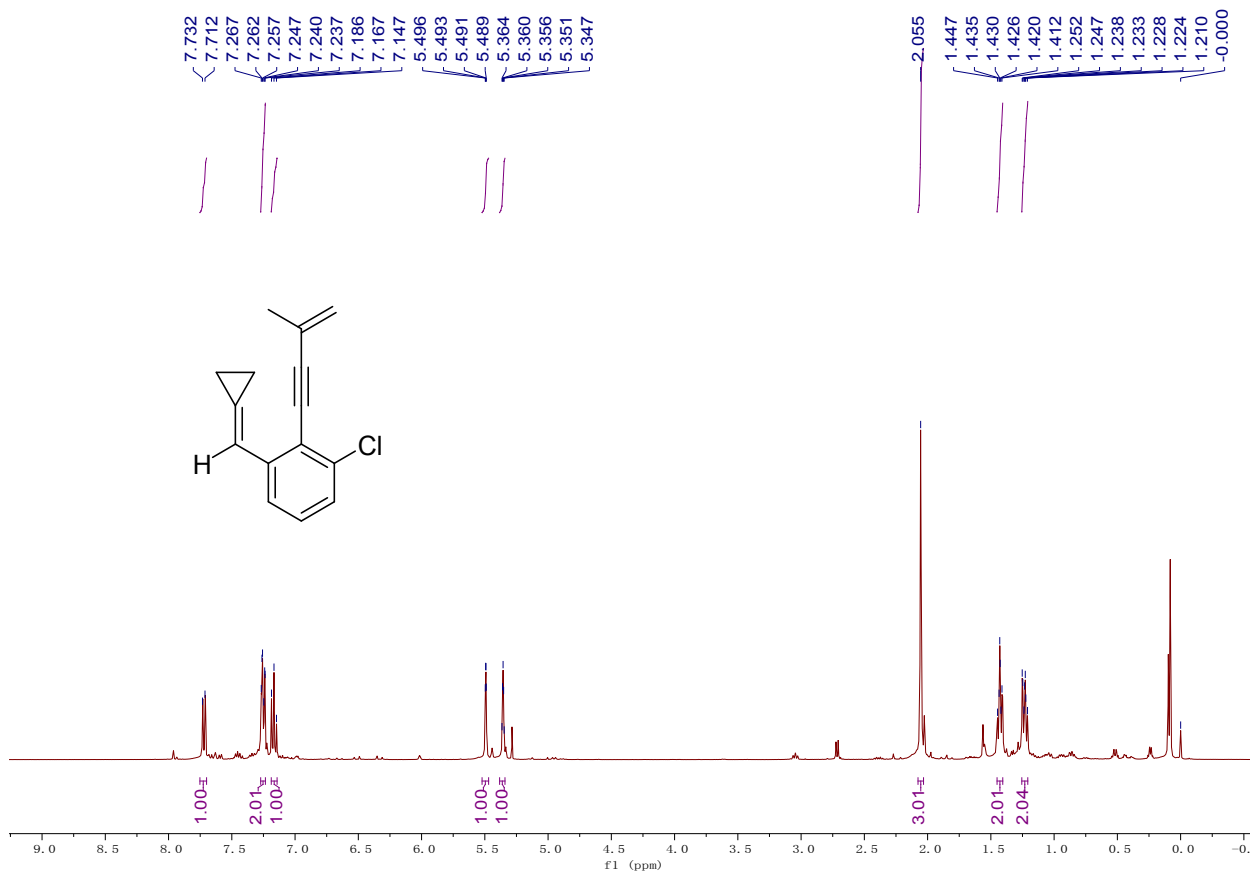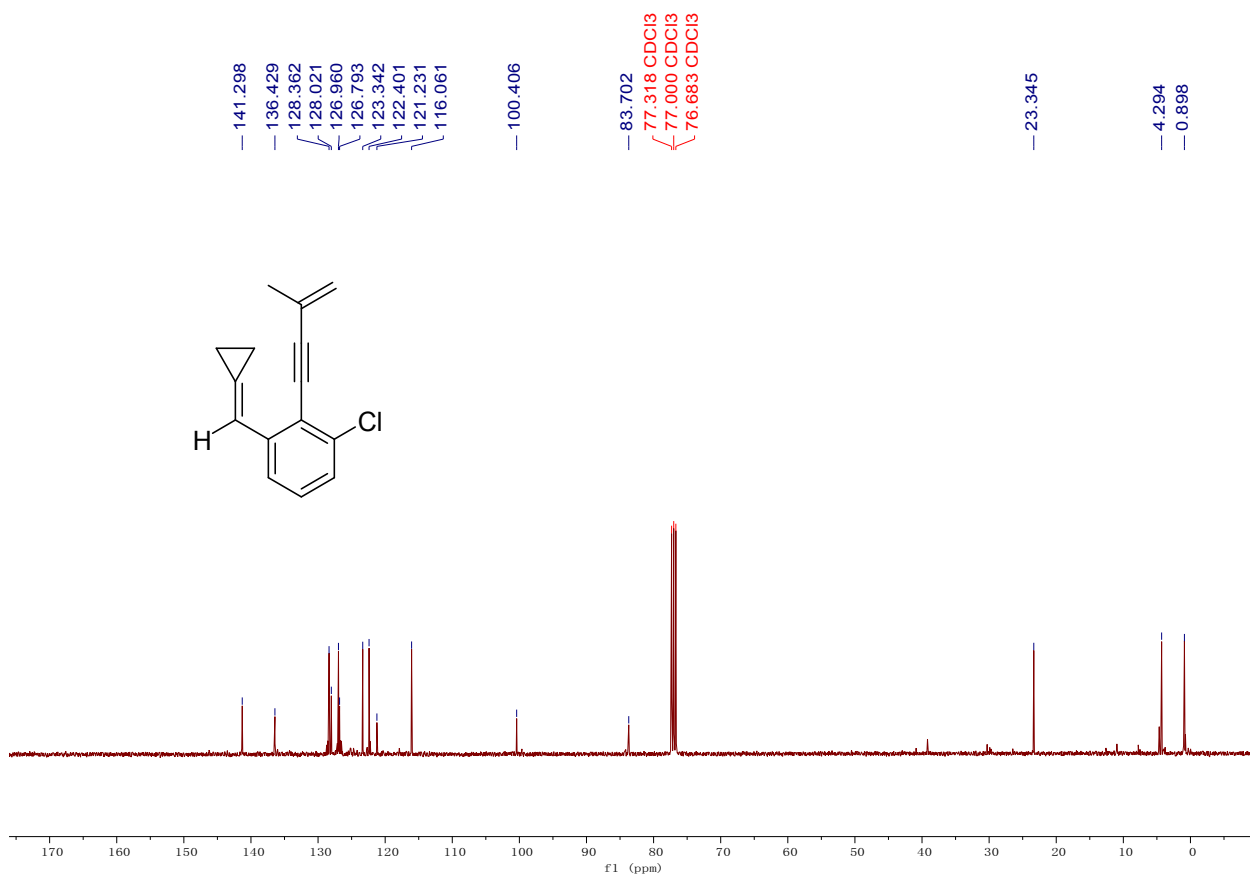

## 2-(cyclopropylidenemethyl)-1-(3-methylbut-3-en-1-yn-1-yl)-4-(trifluoromethyl)benzene (1o)

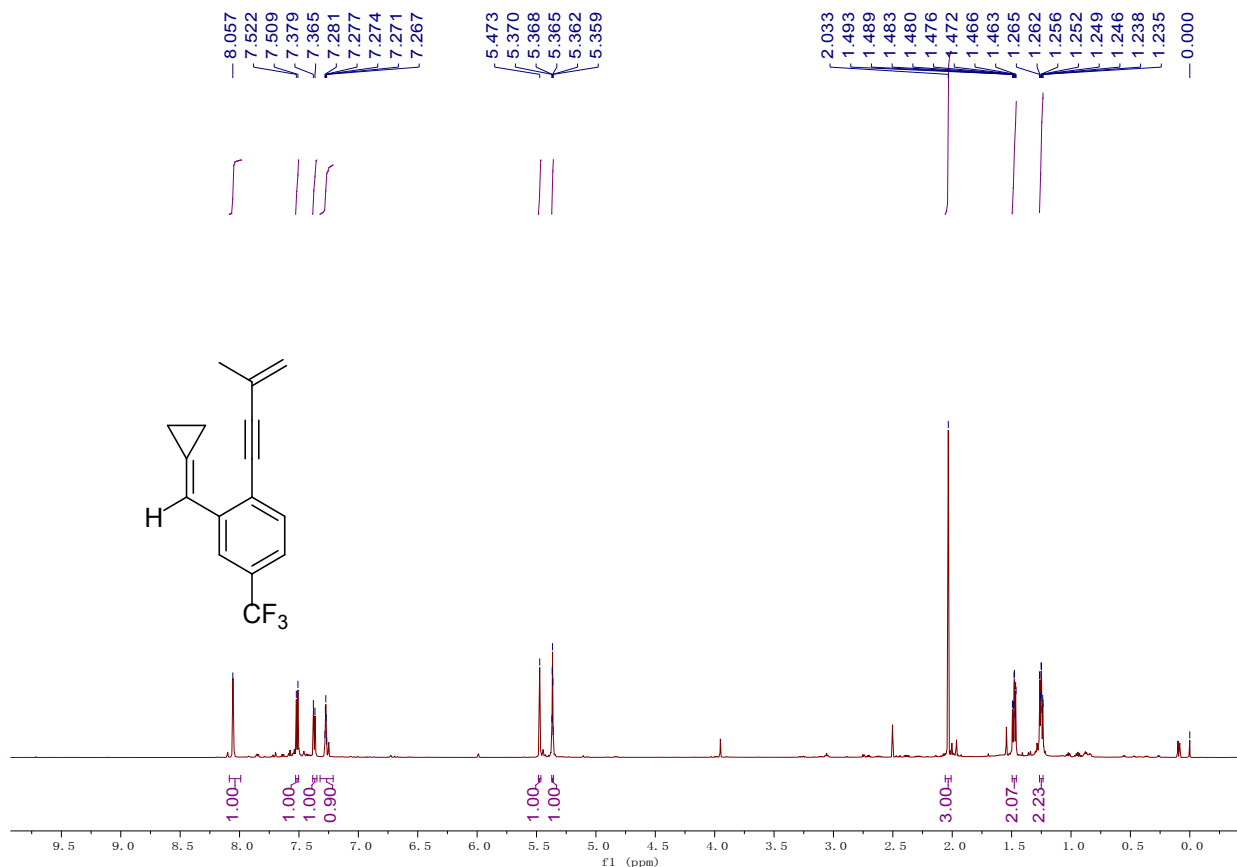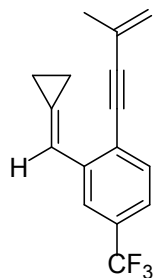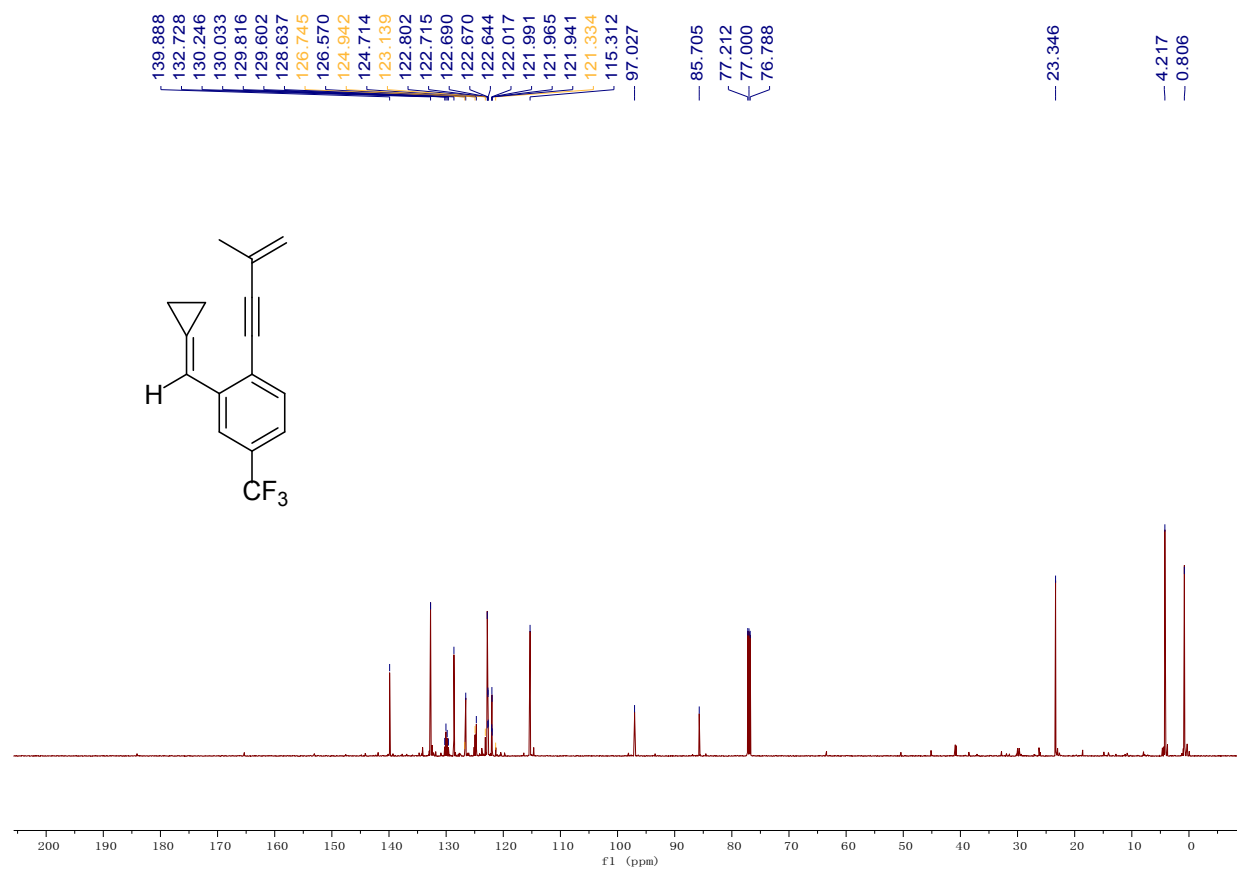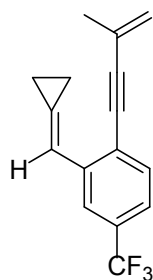

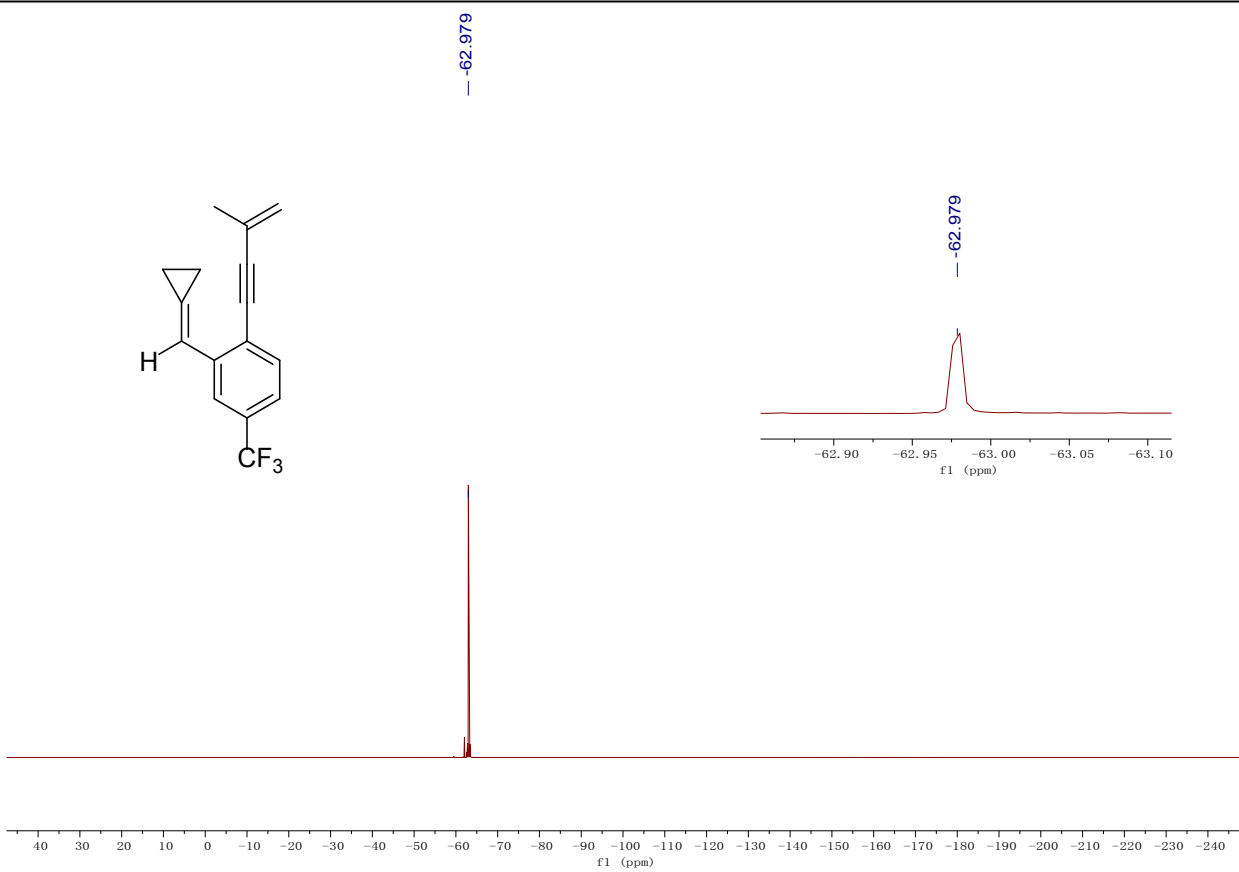

## 2-(cyclopropylidenemethyl)-4-fluoro-1-(3-methylbut-3-en-1-yn-1-yl)benzene (1p)

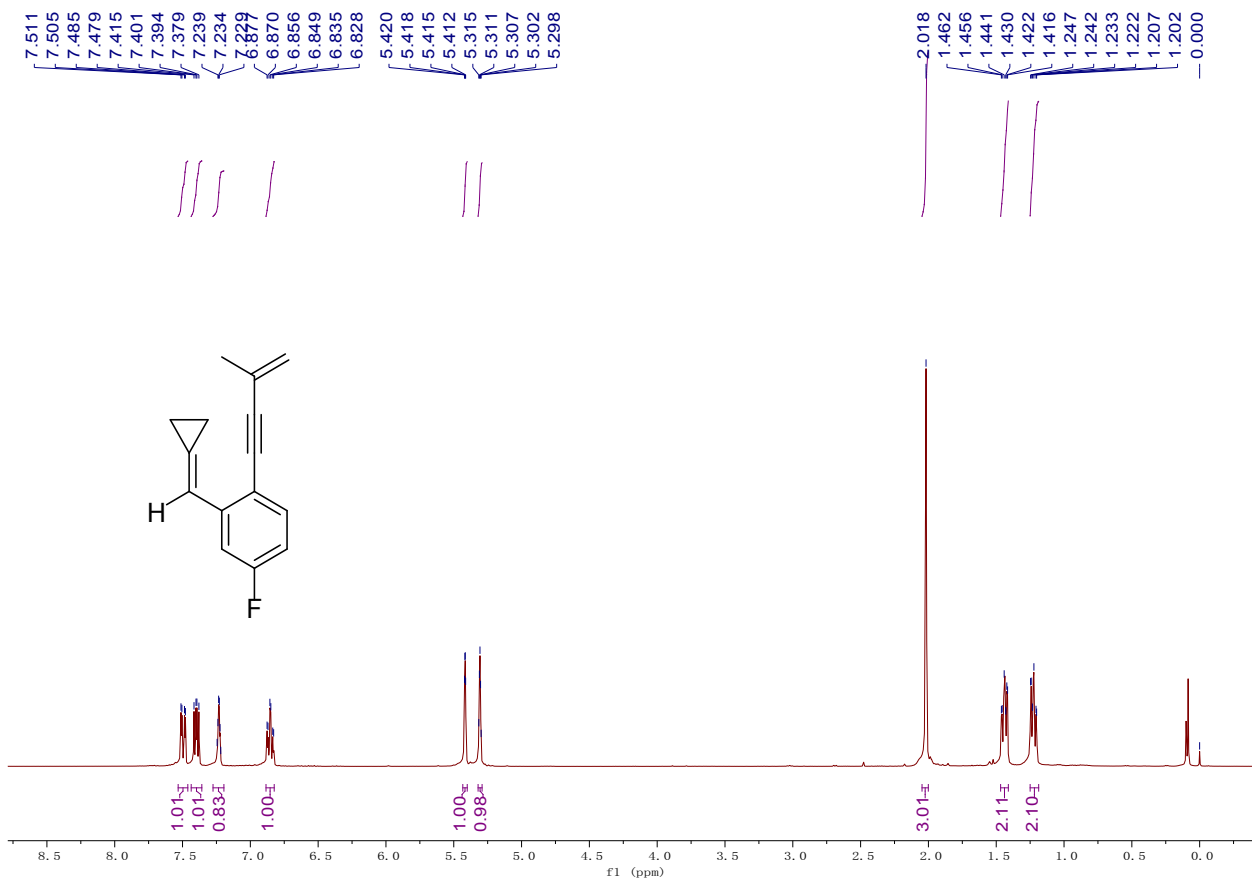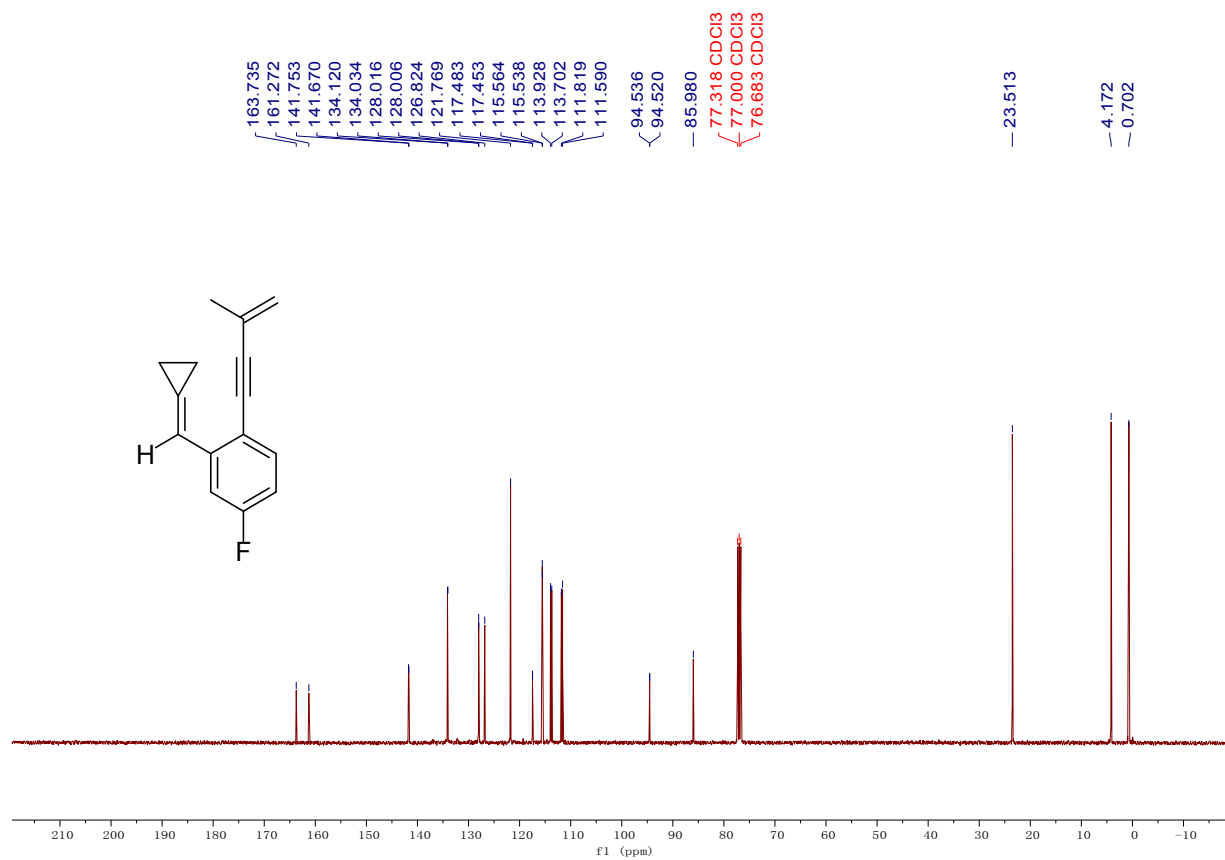

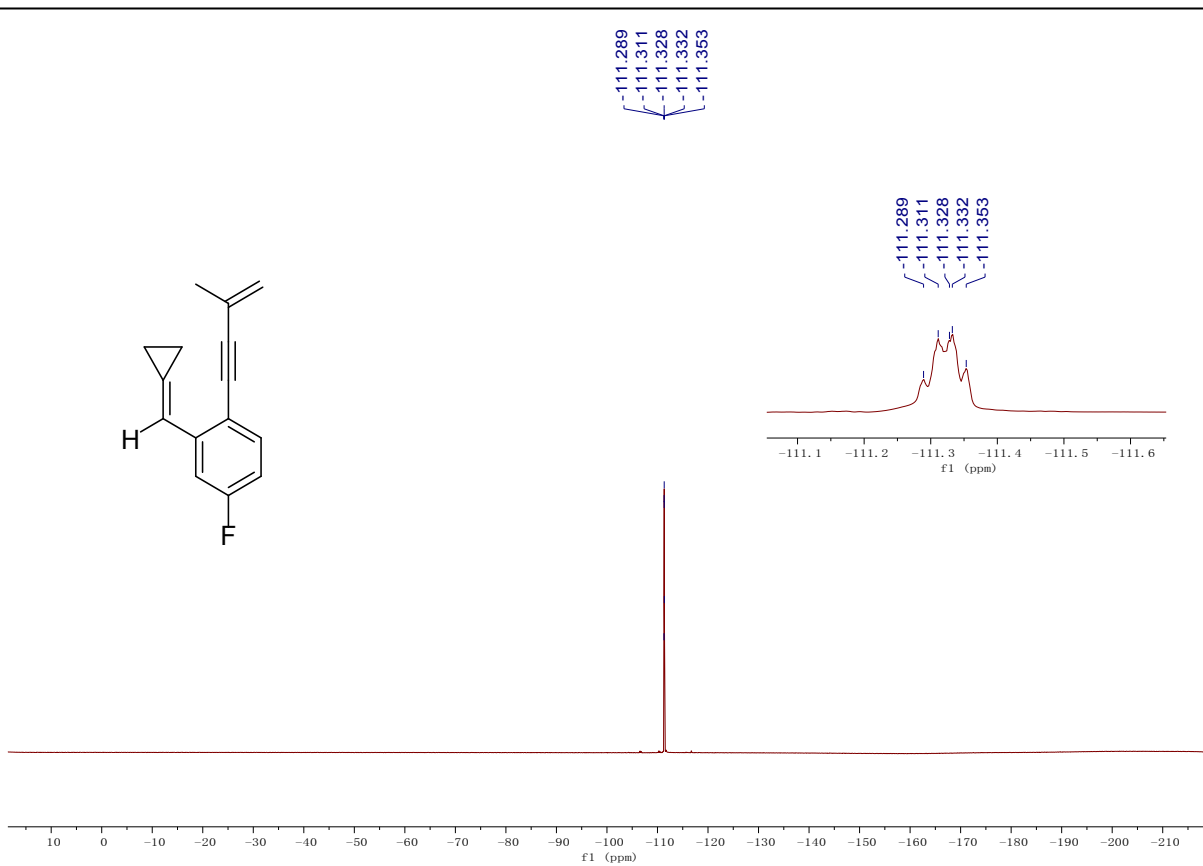



# 1-(cyclopropylidenemethyl)-4-methyl-2-(3-methylbut-3-en-1-yn-1-yl)benzene (1q)

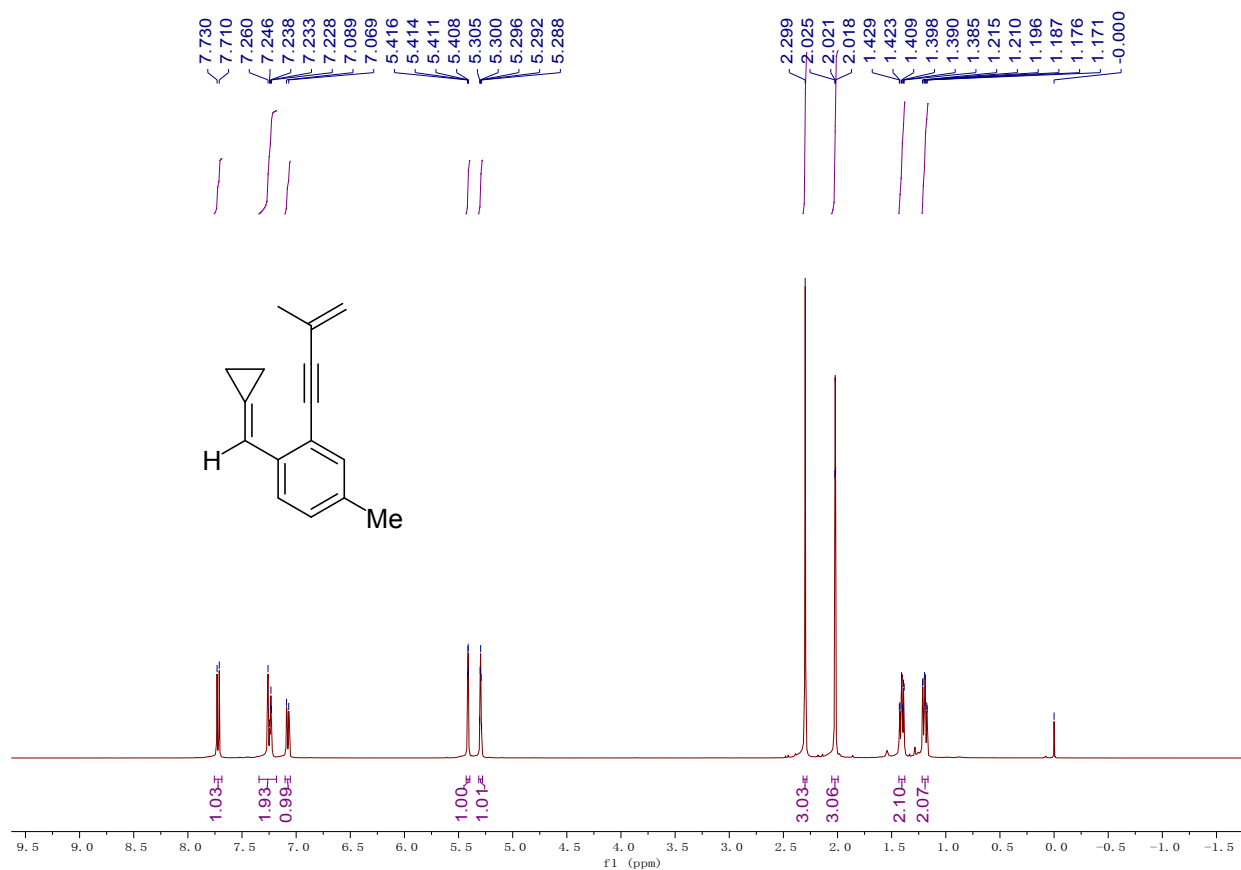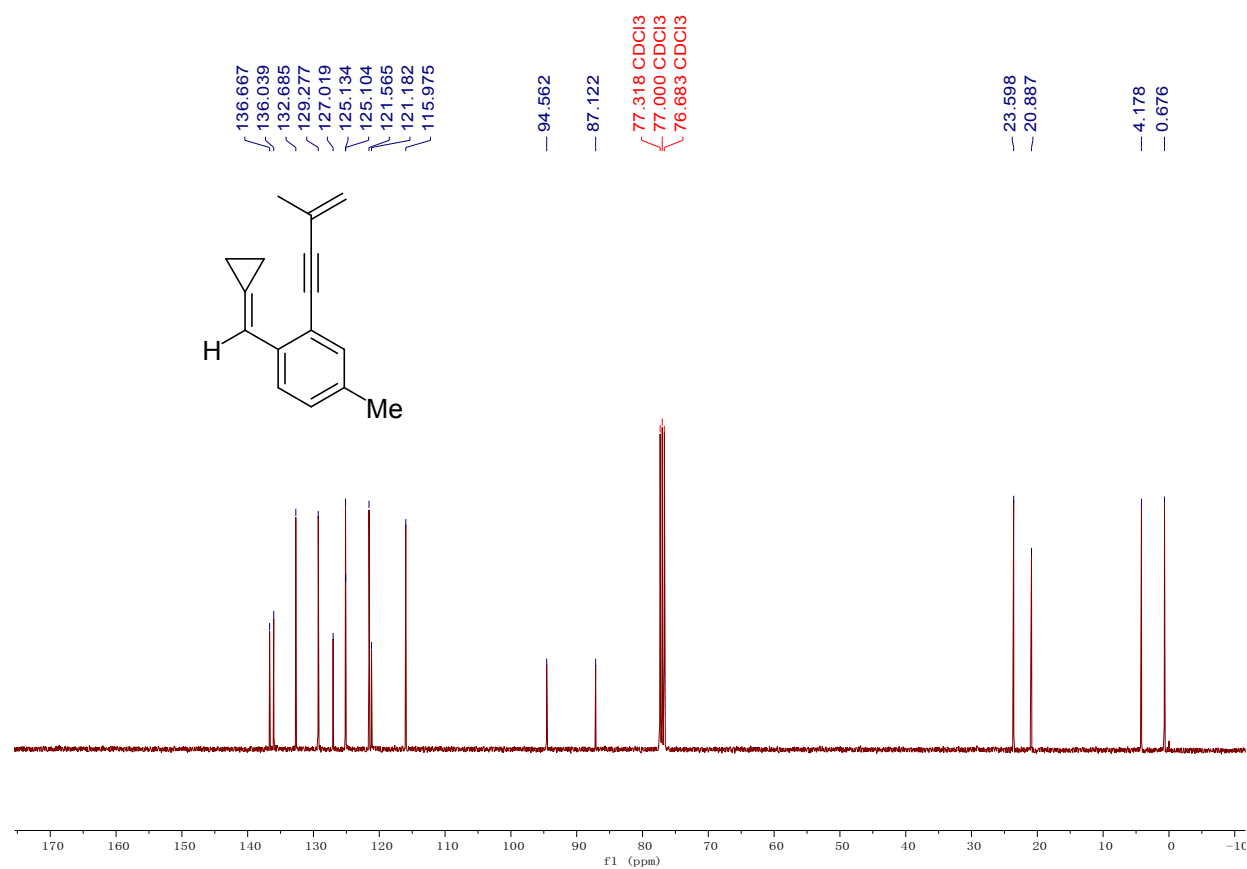

# 4-chloro-2-(cyclopropylidenemethyl)-1-(3-methylbut-3-en-1-yn-1-yl)benzene (1r)

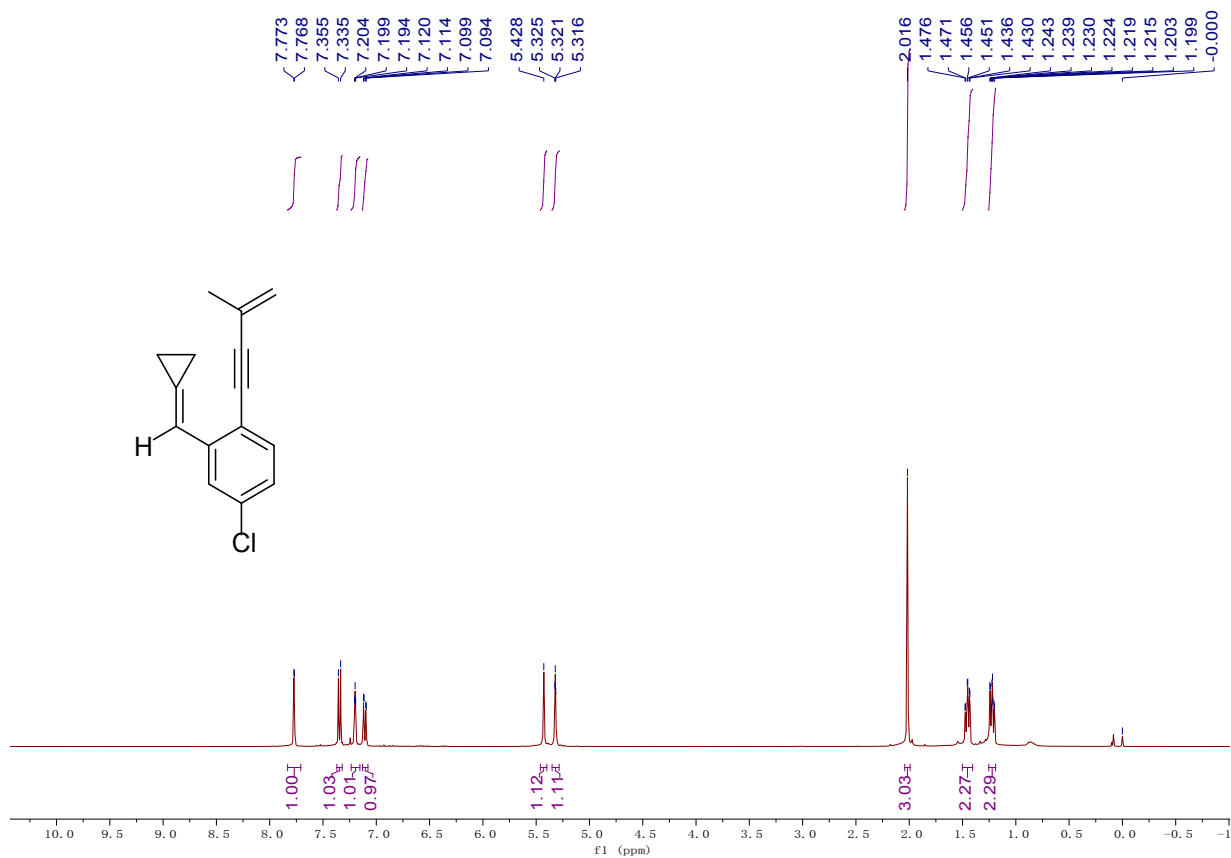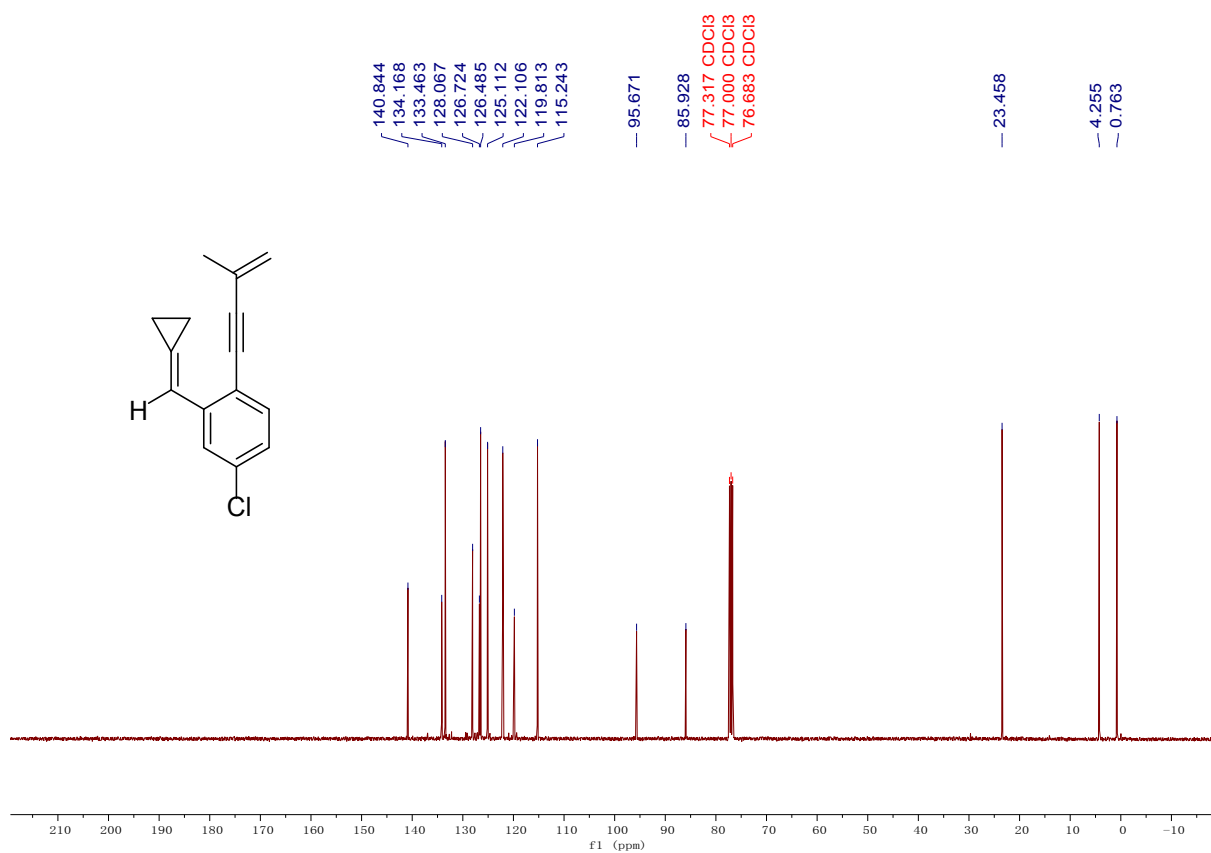

# 4-chloro-1-(cyclopropylidenemethyl)-2-(3-methylbut-3-en-1-yn-1-yl)benzene (1s)

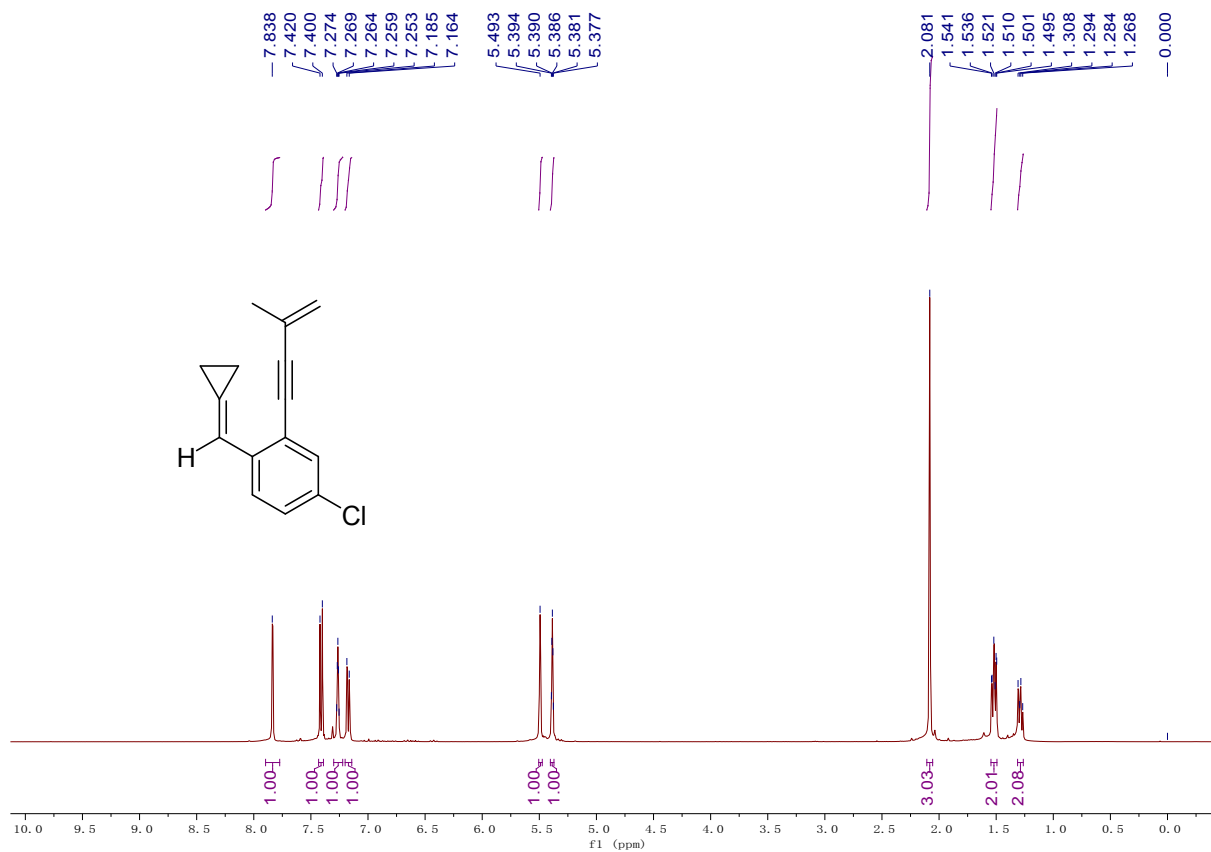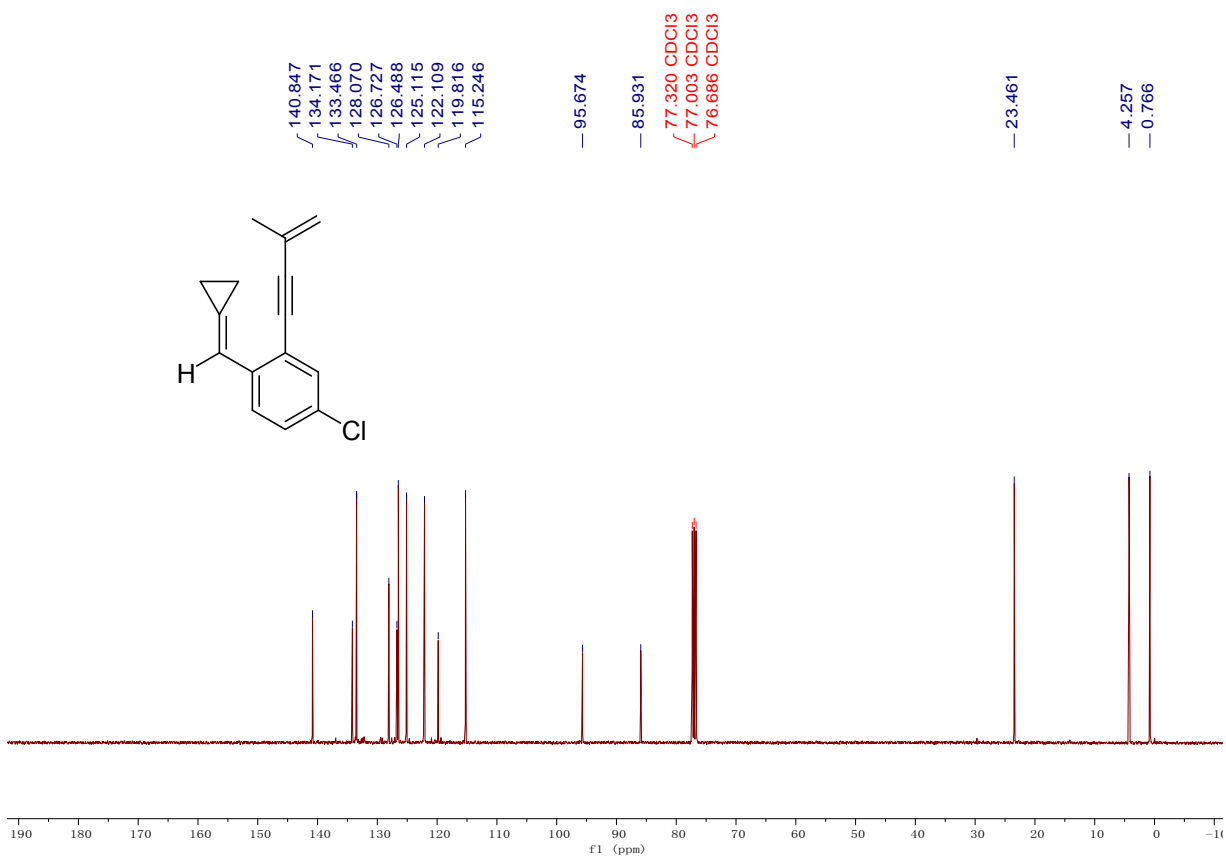

## 2-(cyclopropylidenemethyl)-4-methoxy-1-(3-methylbut-3-en-1-yn-1-yl)benzene (1t)

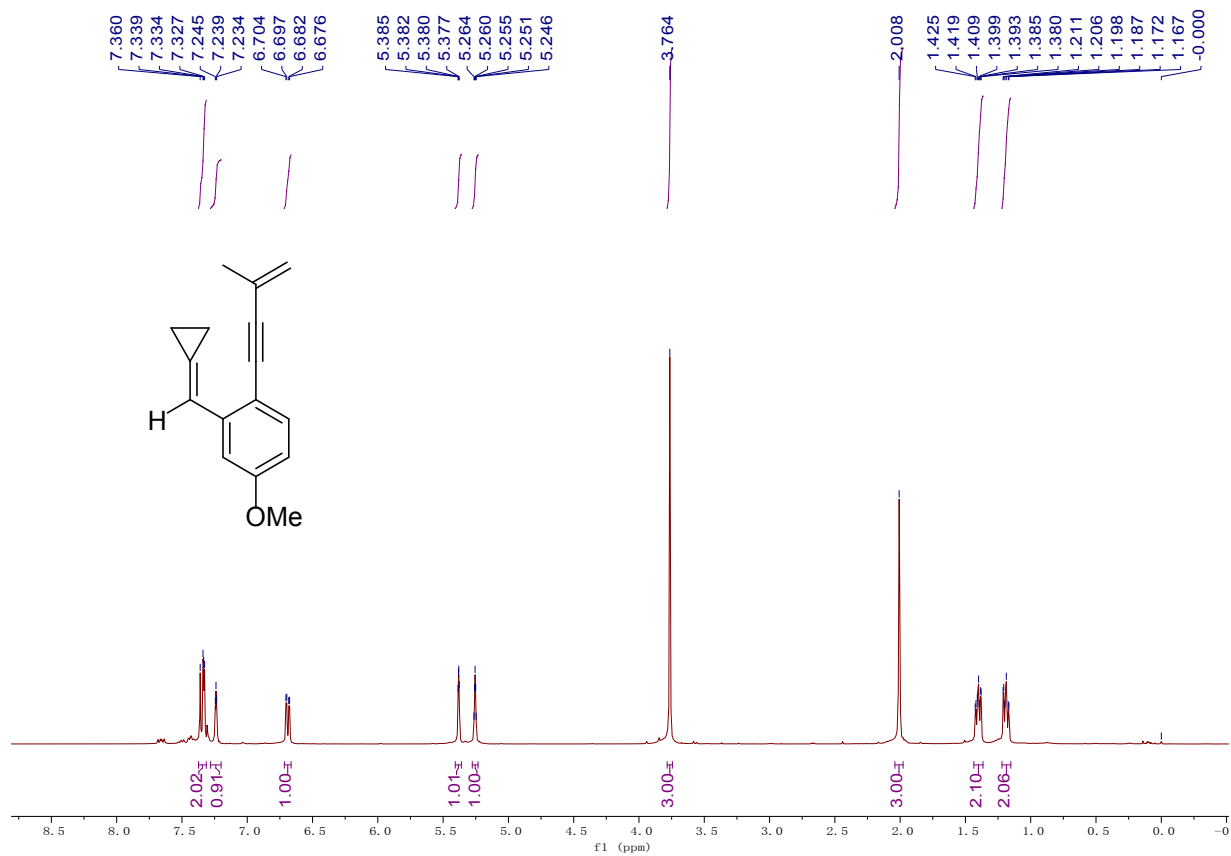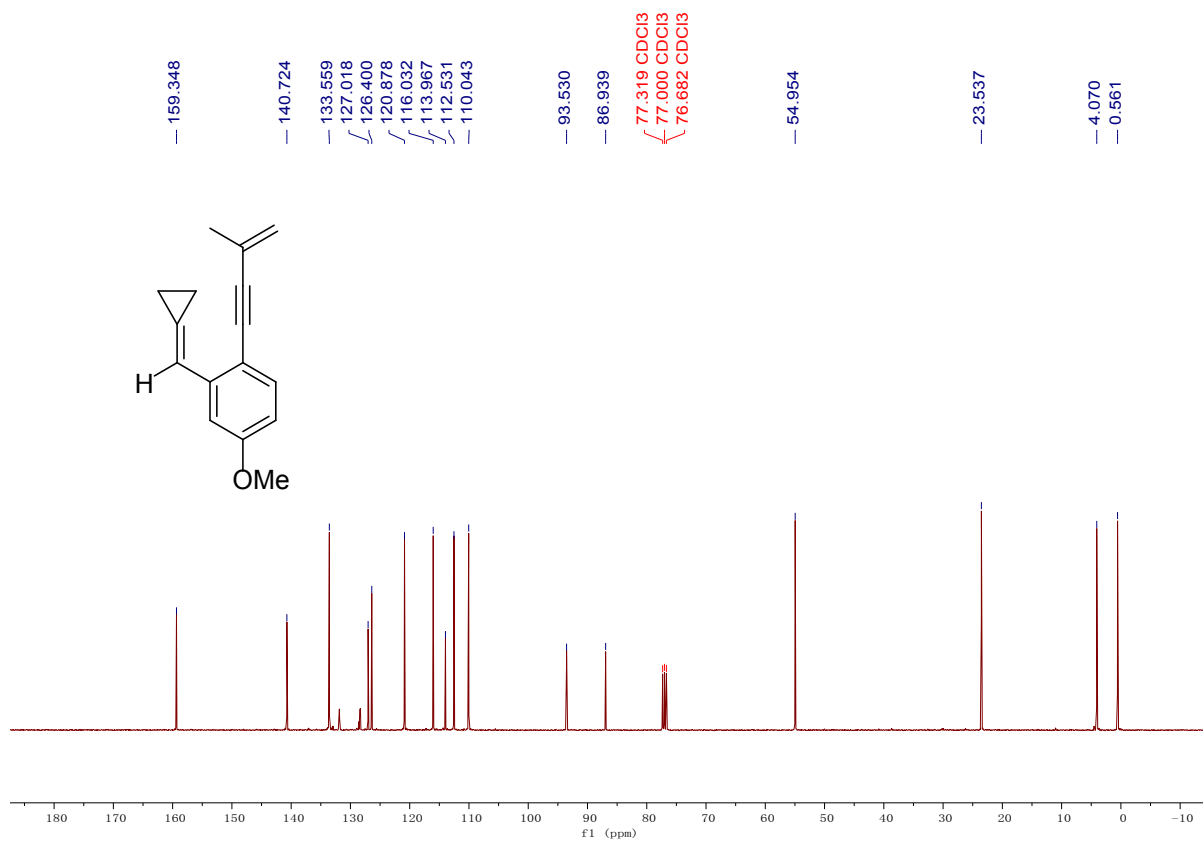

# 5-(cyclopropylidenemethyl)-4-(3-methylbut-3-en-1-yn-1-yl)benzo[d][1,3]dioxole (1u)

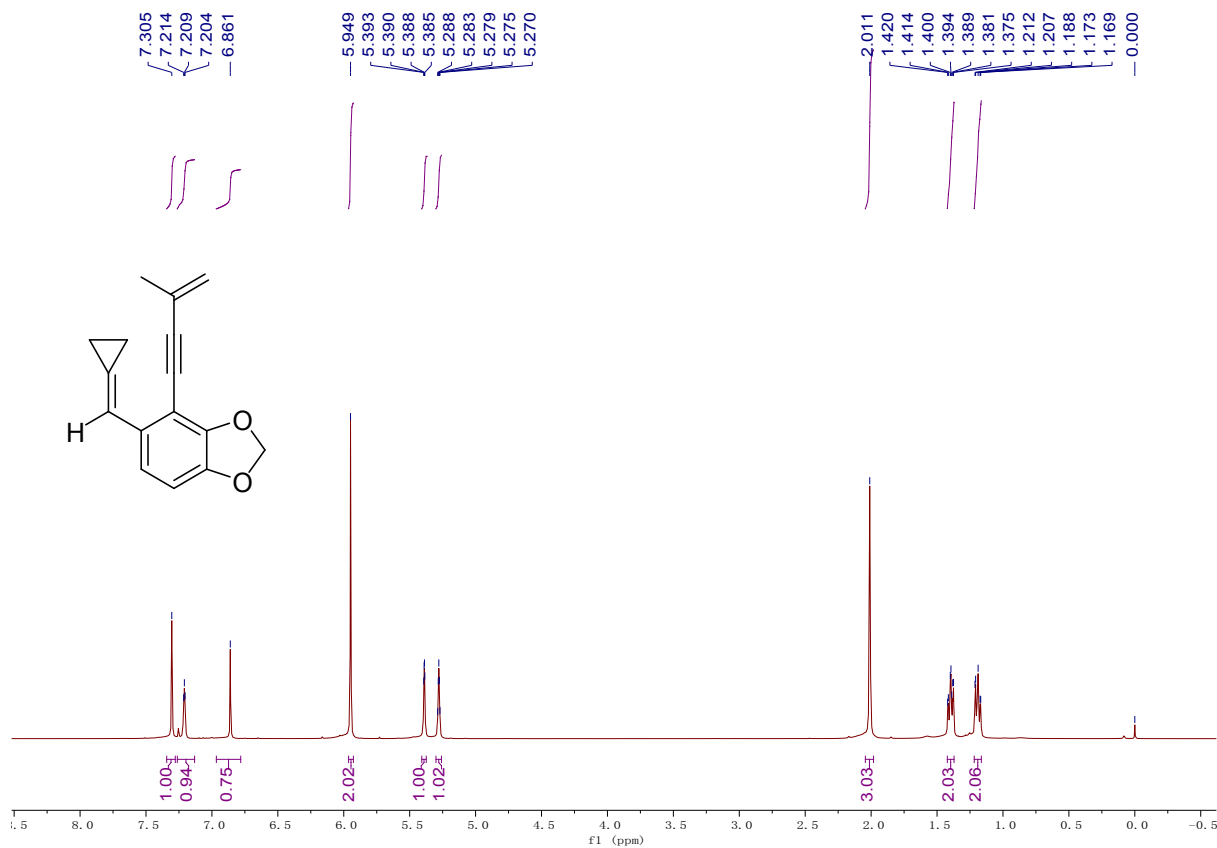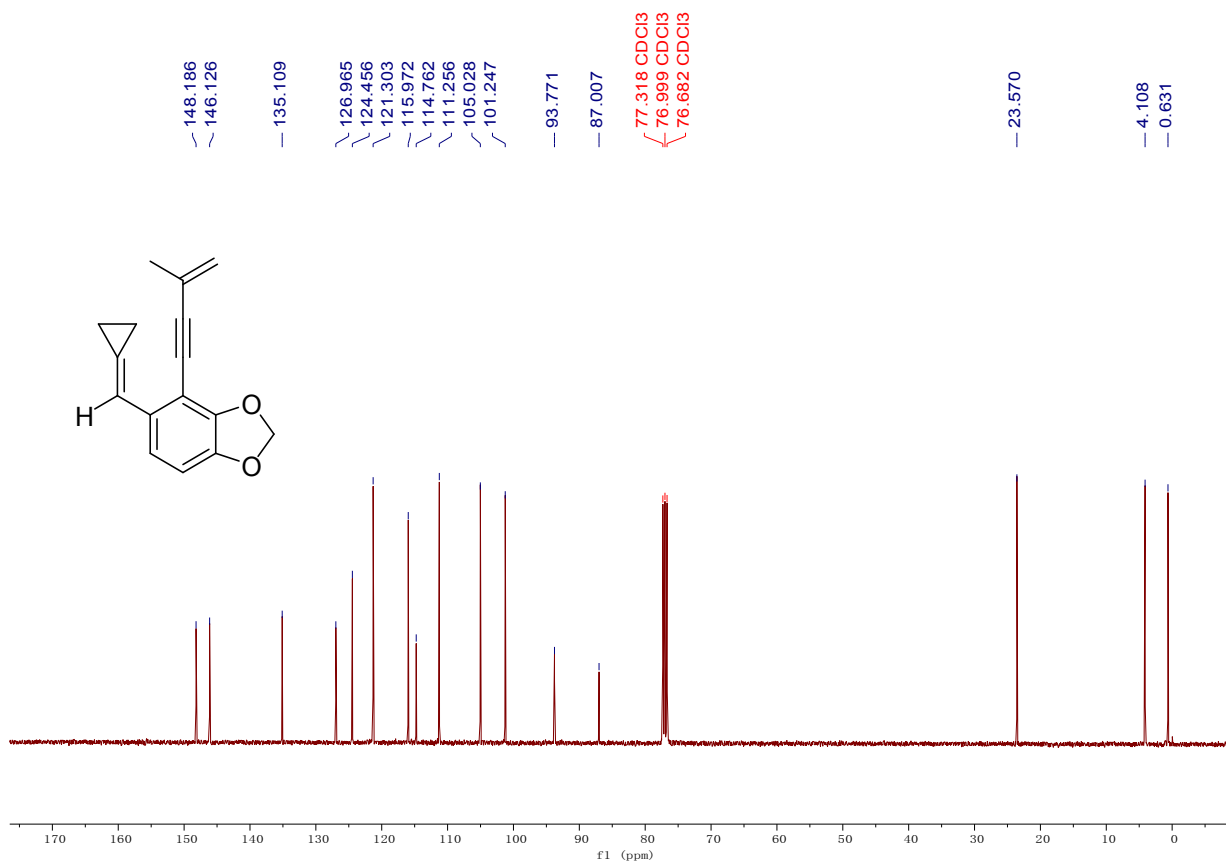

### 1-(cyclohex-1-en-1-ylethynyl)-2-(cyclopropylidenemethyl)benzene (1v)

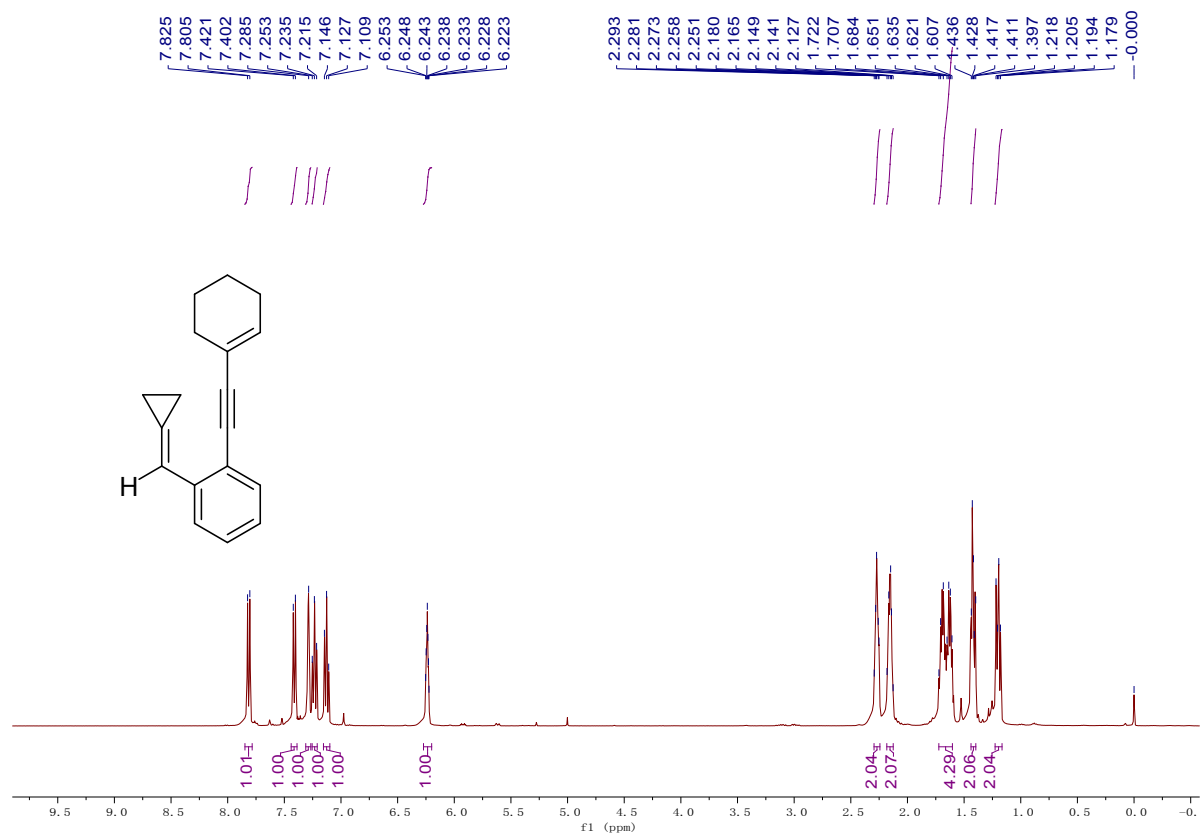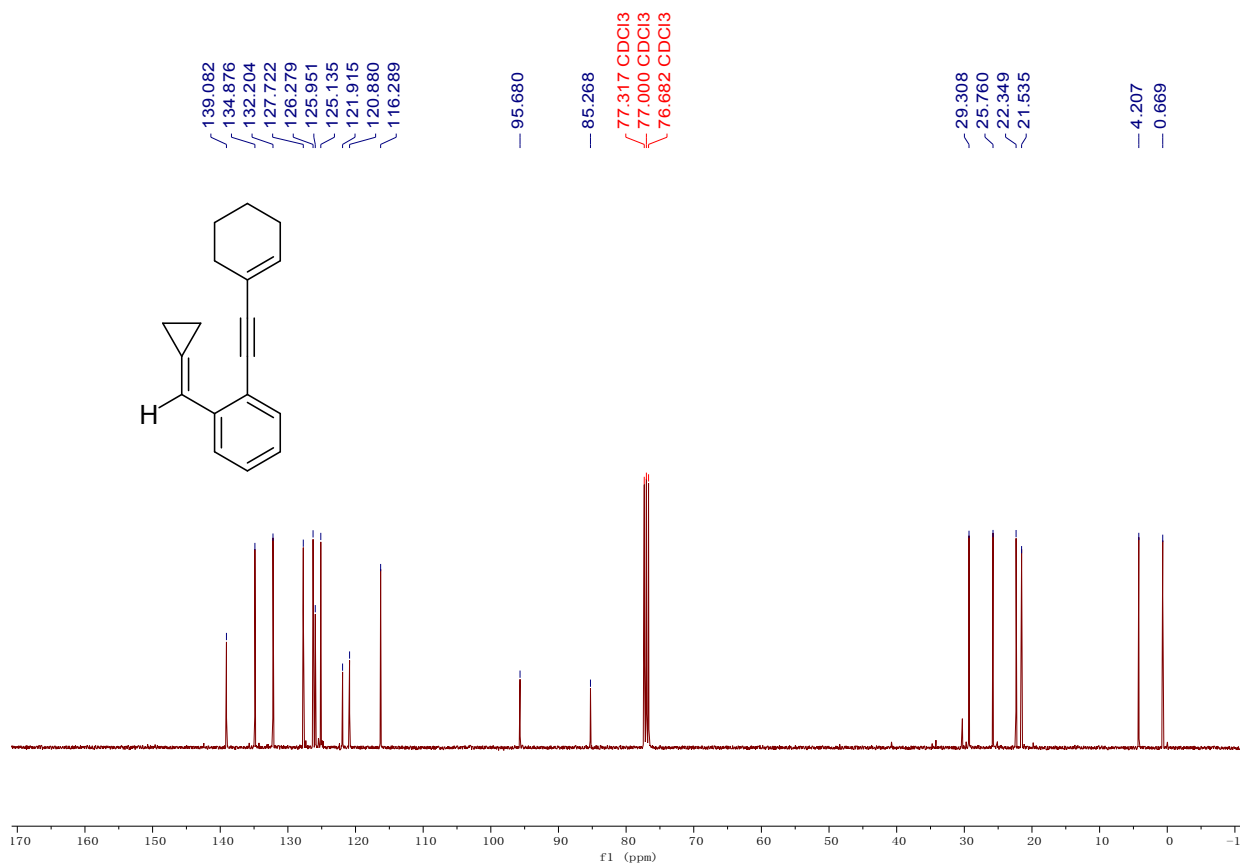

### 2-(cyclopropylidenemethyl)-1-(3-methylbut-3-en-1-yn-1-yl)naphthalene (1w)

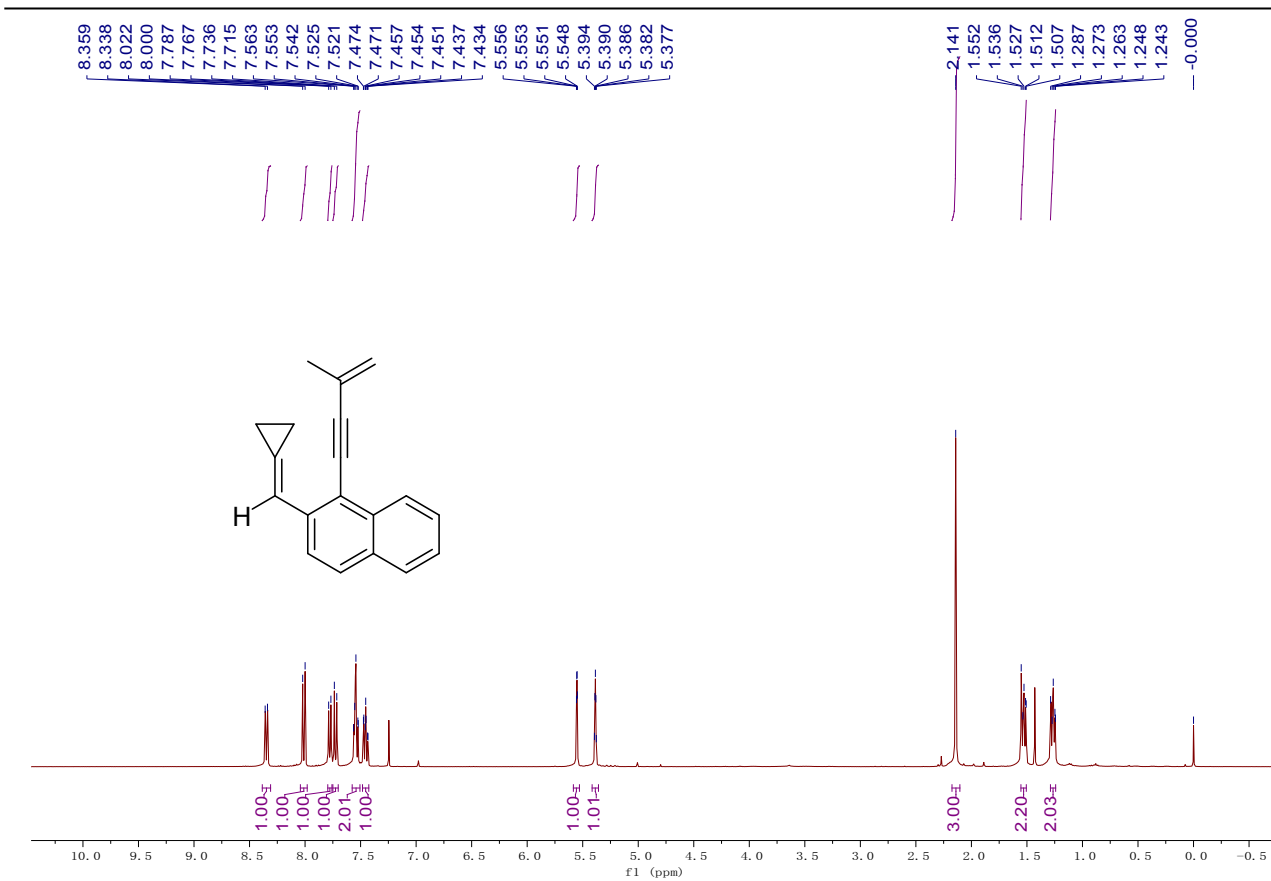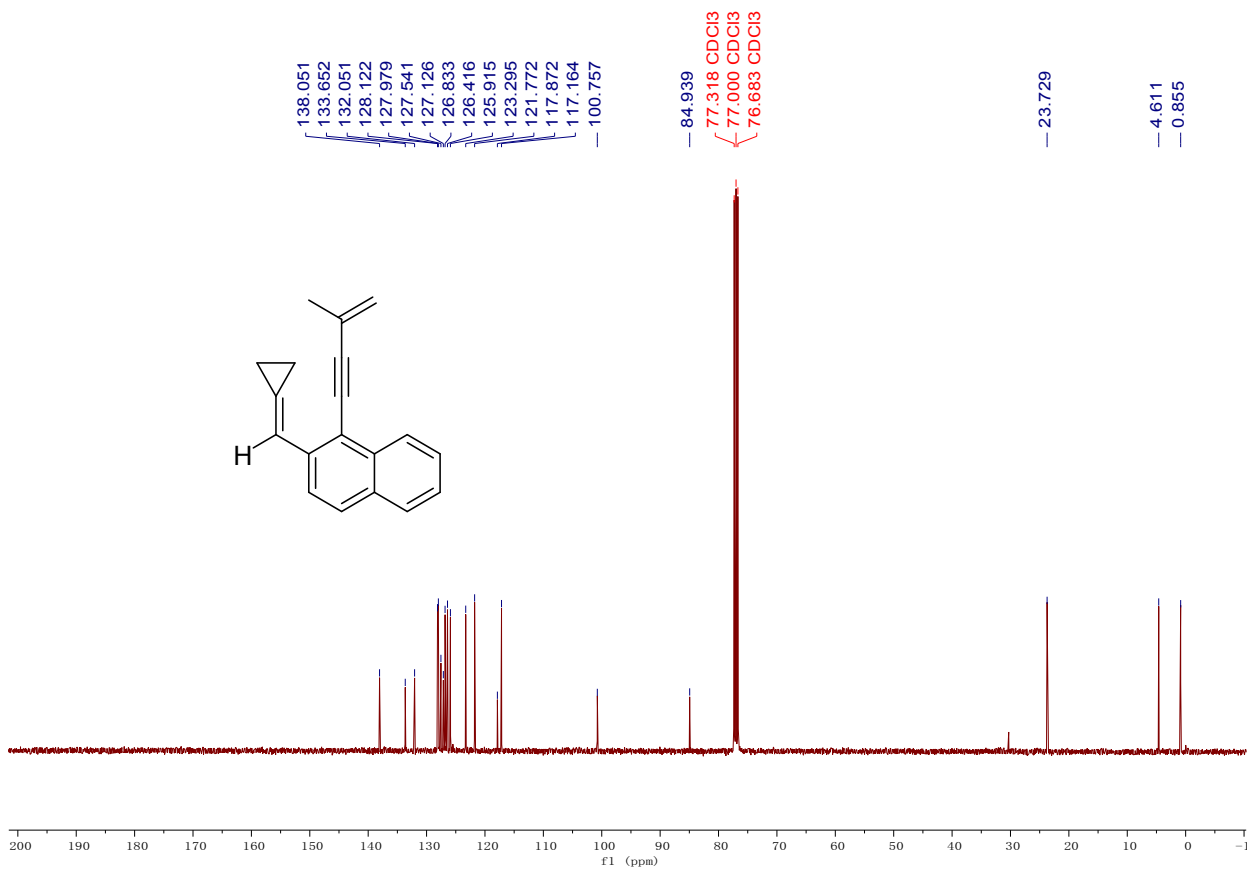

Note: Due to the low polarity, products **2** and **3** could not be separated completely via a column

chromatography on silica gel in some cases. Therefore, the isolated total yield of inseparable mixture is marked. The ratio of 2/3 was determined from the crude  $^{19}\text{F}$ -NMR spectra detected with  $\text{CF}_3\text{-DMAc}$  as an internal standard and the data of major product are listed below in most cases.

### 3-methyl-9-phenyl-3-(2,2,2-trifluoroethyl)-2,3-dihydro-1H-cyclopenta[b]naphthalene-4-carbonitrile (2a)

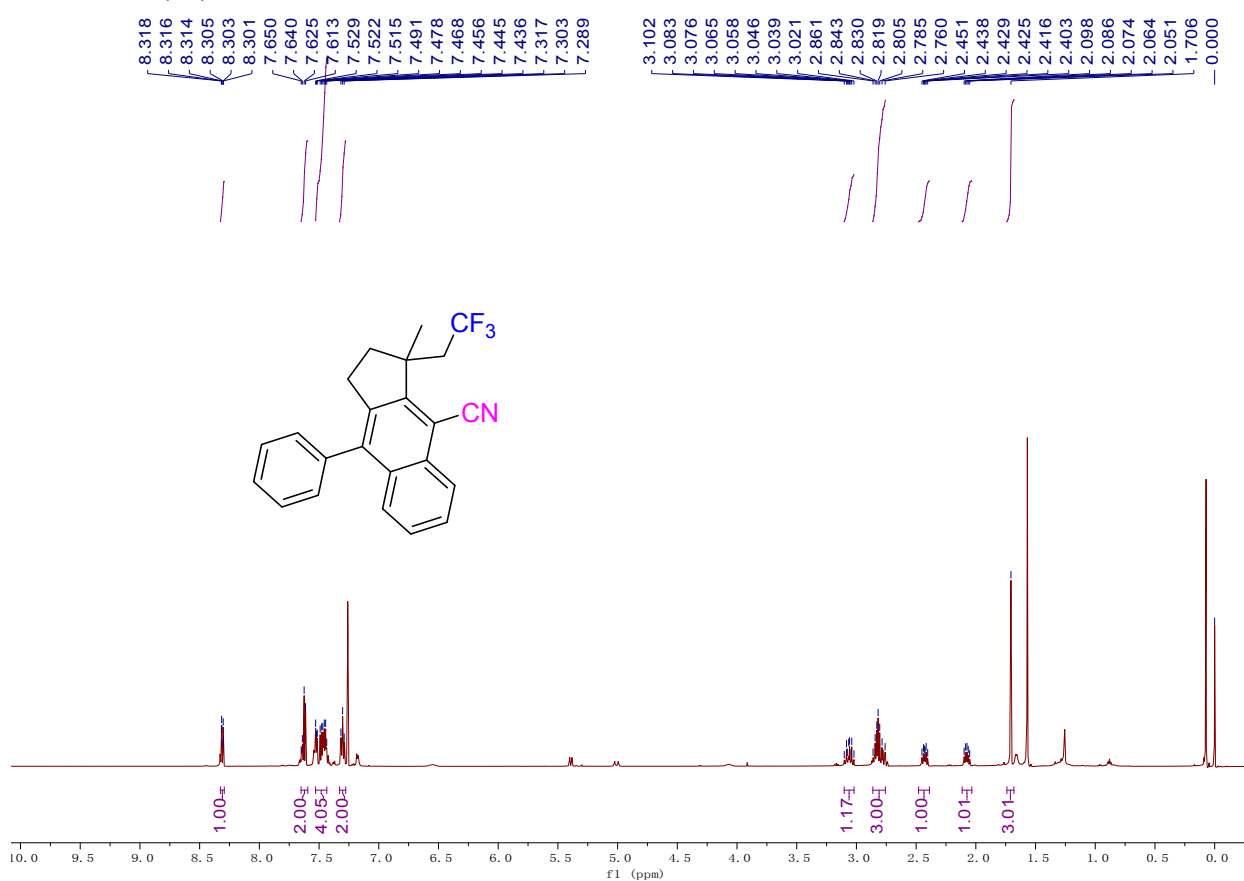



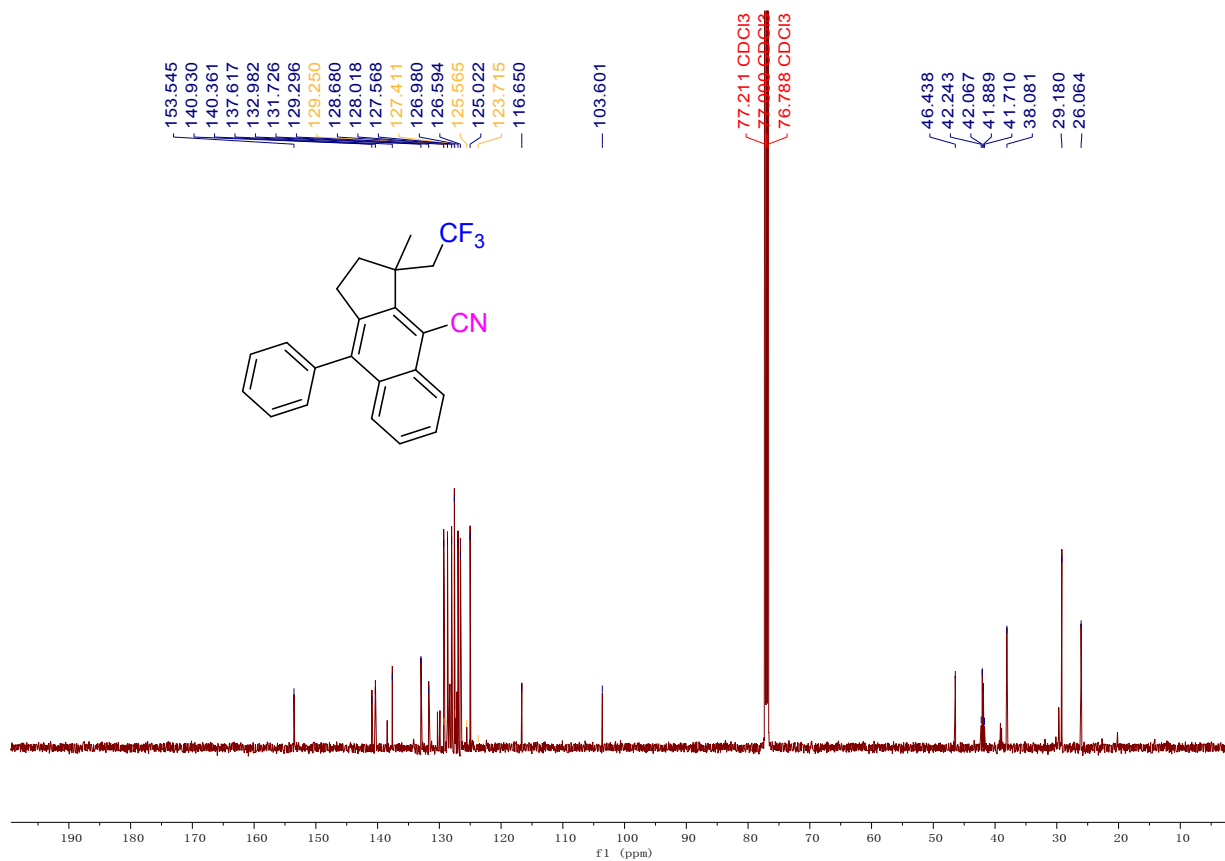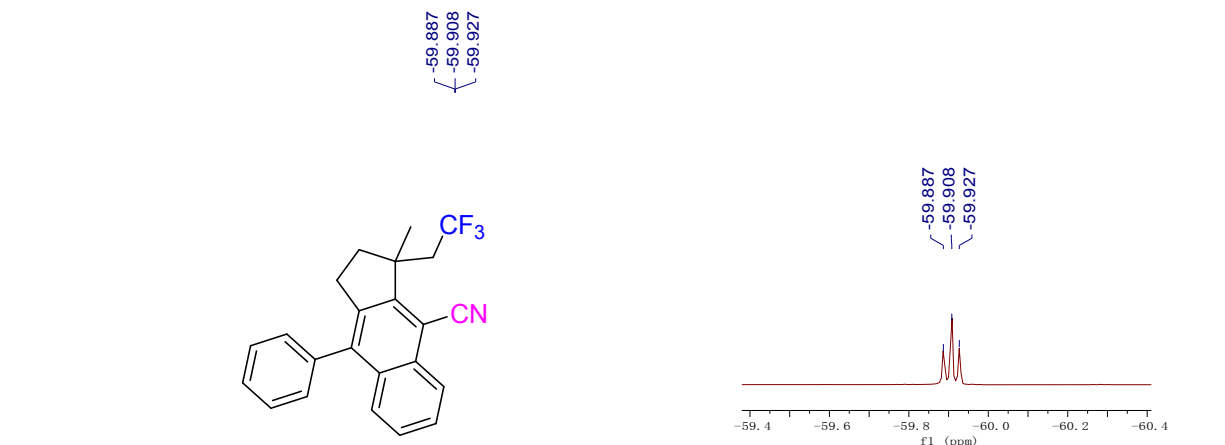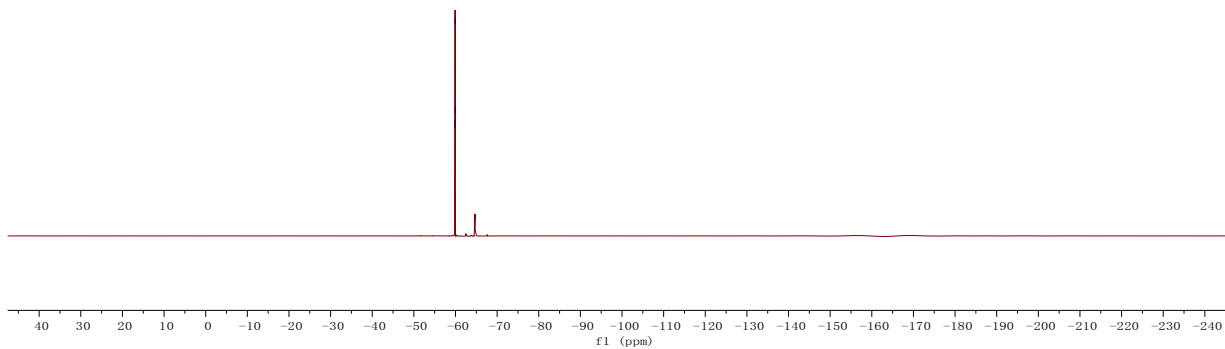

**9-(4-chlorophenyl)-3-methyl-3-(2,2,2-trifluoroethyl)-2,3-dihydro-1H-**

# cyclopenta[*b*]naphthalene-4-carbonitrile (2b)

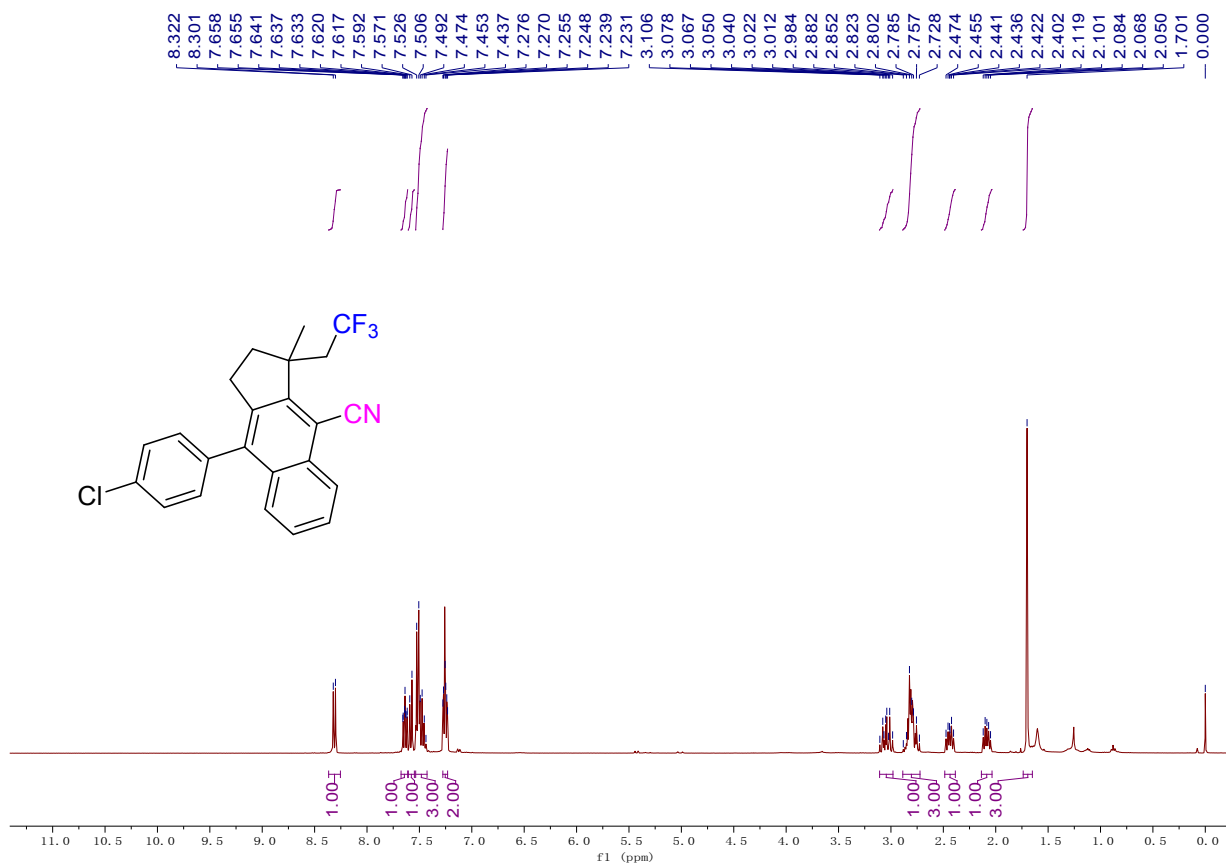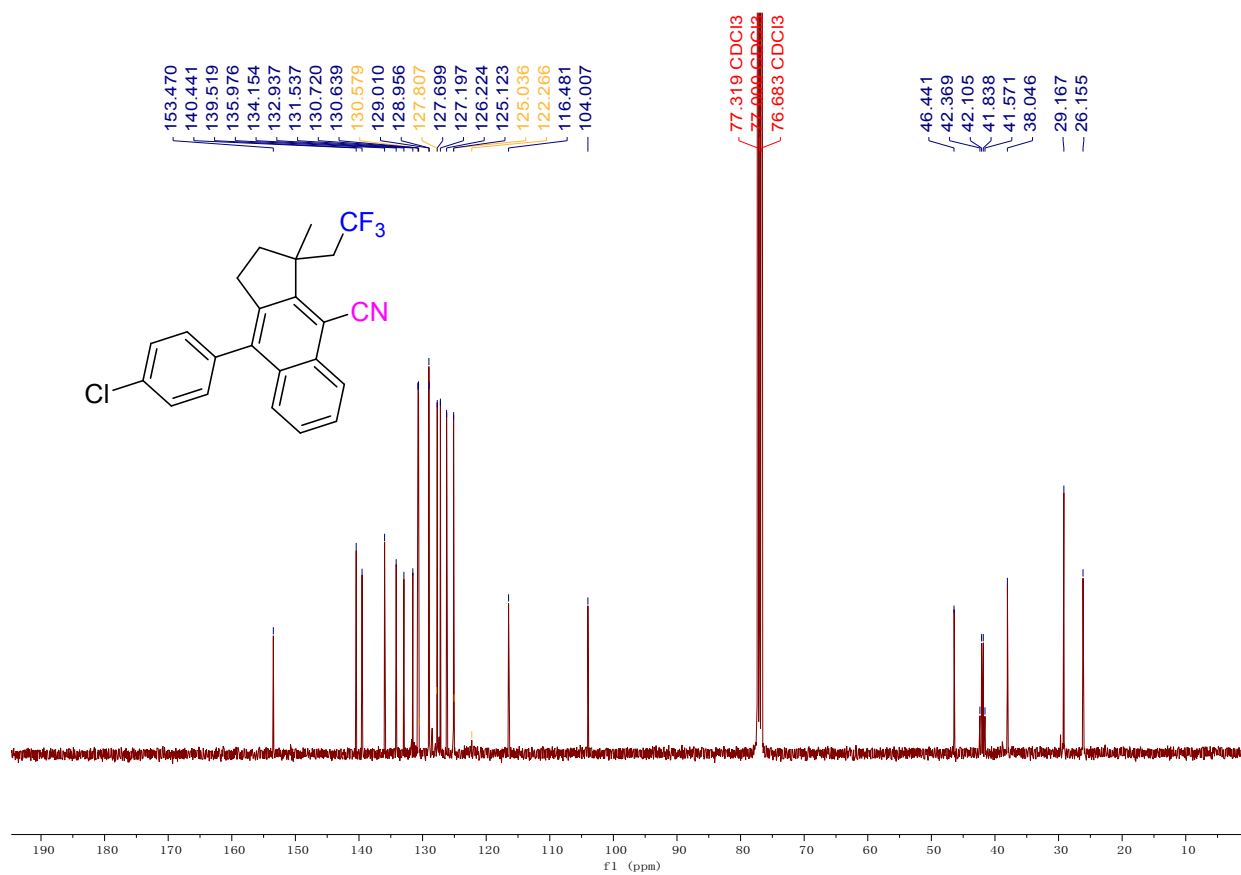

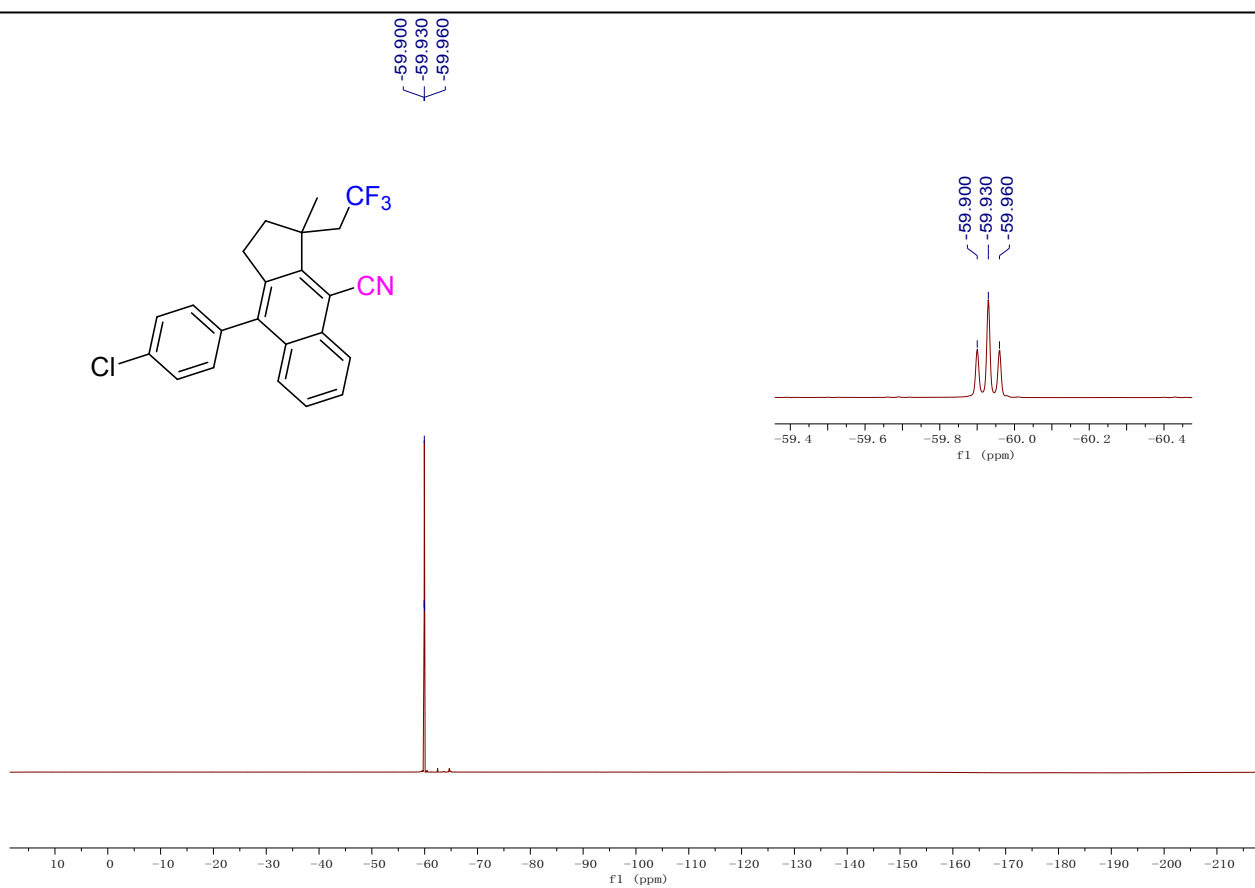

**4-(4-chlorophenyl)-2-(4,4,4-trifluorobutan-2-yl)-3-vinyl-1-naphthonitrile (3b)**

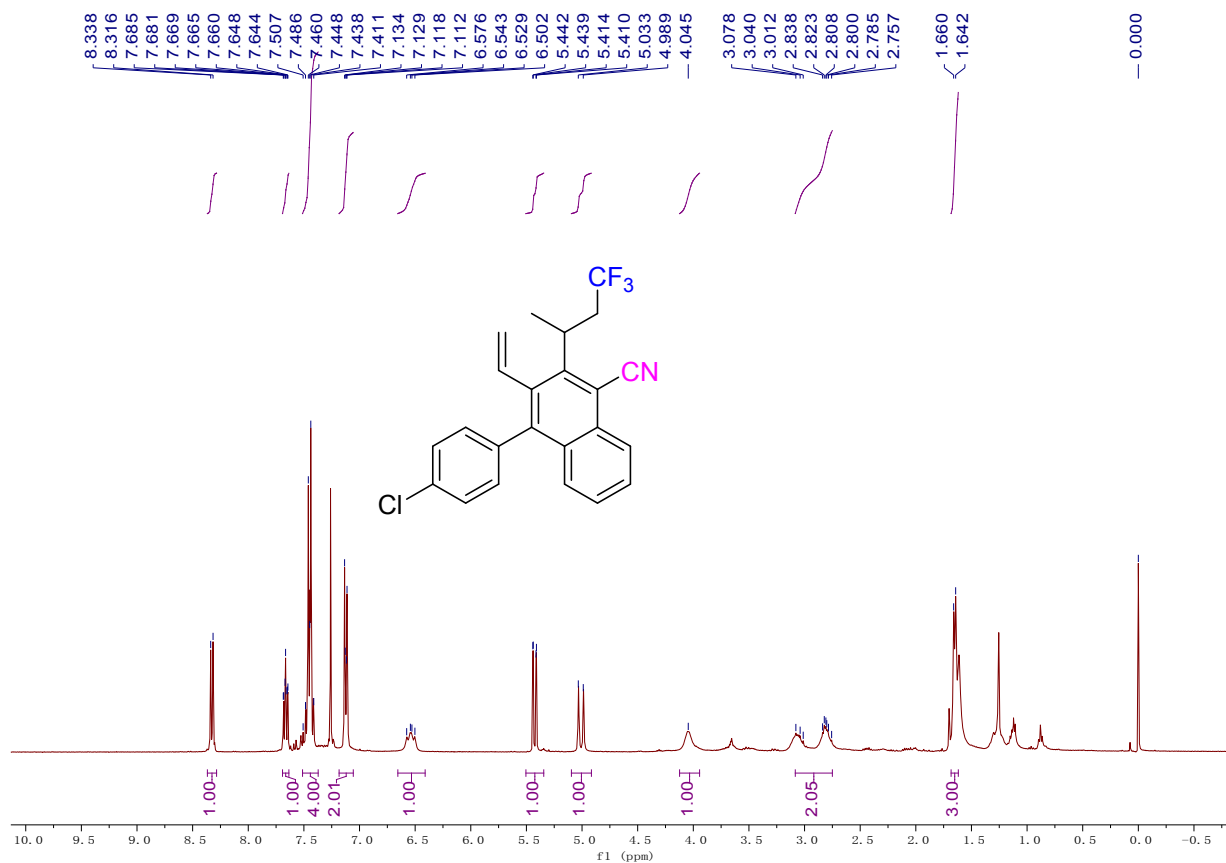

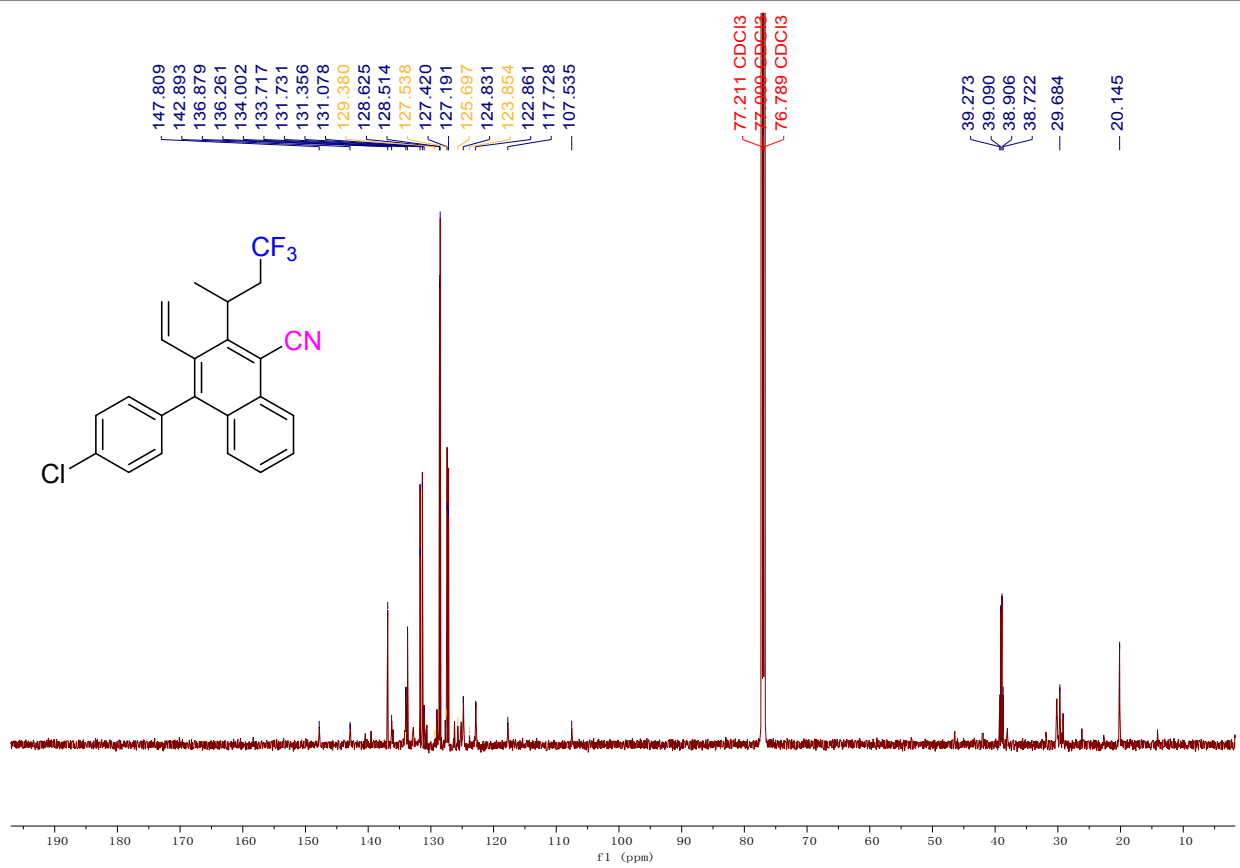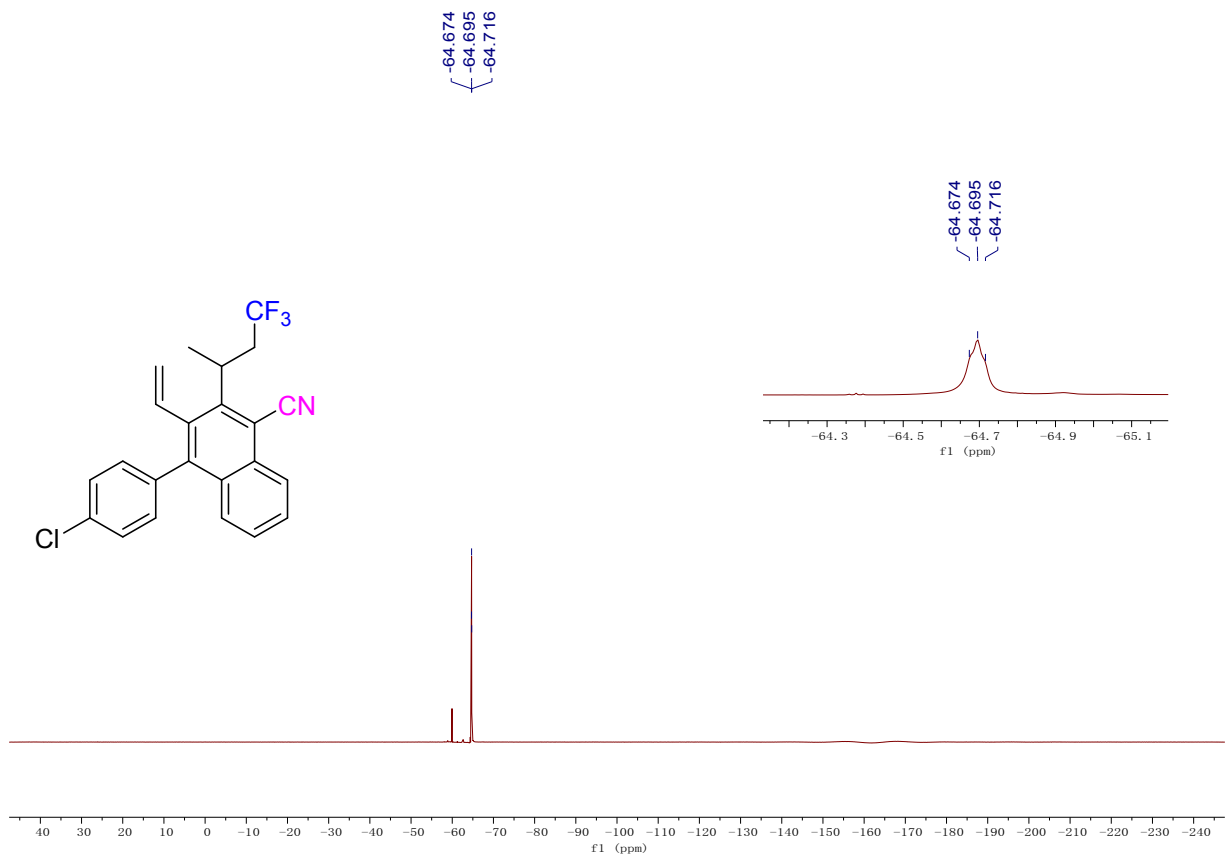

9-(4-(*tert*-butyl)phenyl)-3-methyl-3-(2,2,2-trifluoroethyl)-2,3-dihydro-1H-cyclopenta[*b*]naphthalene-4-carbonitrile (2c)

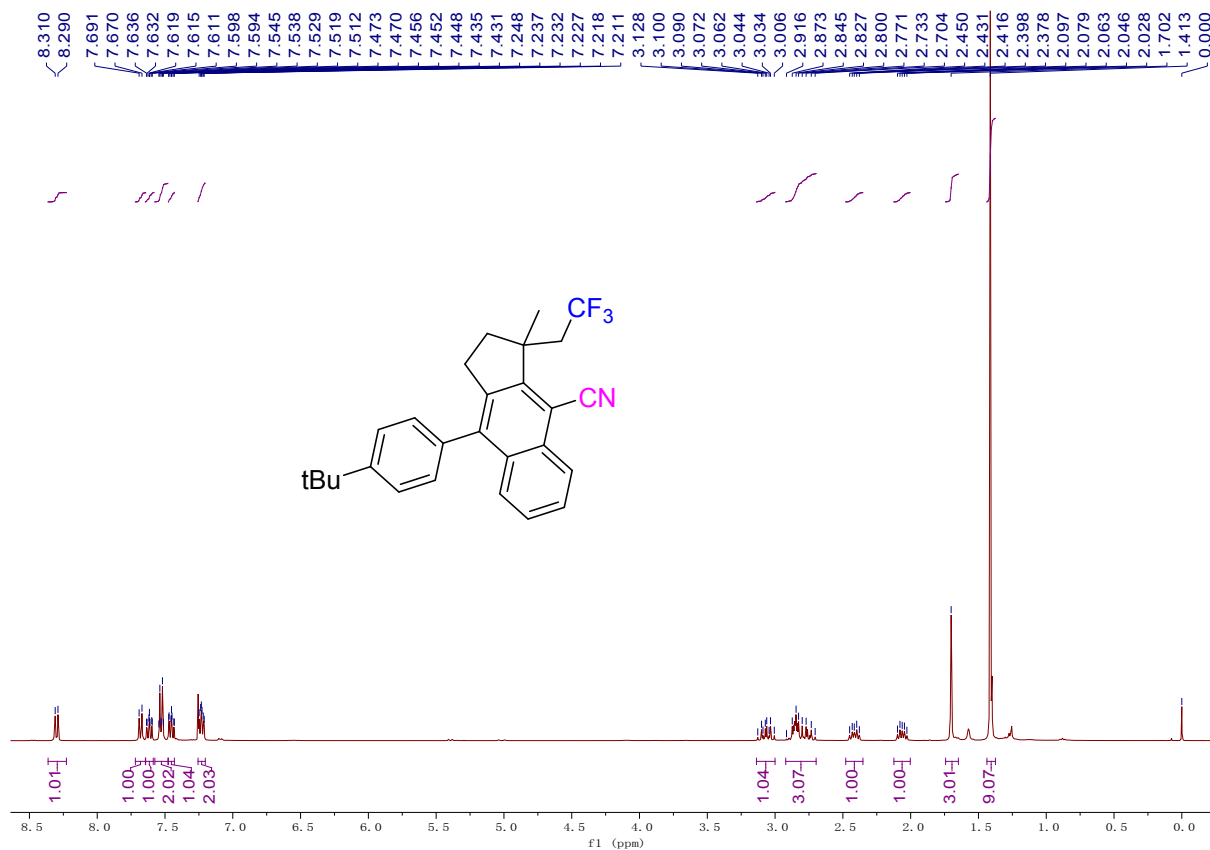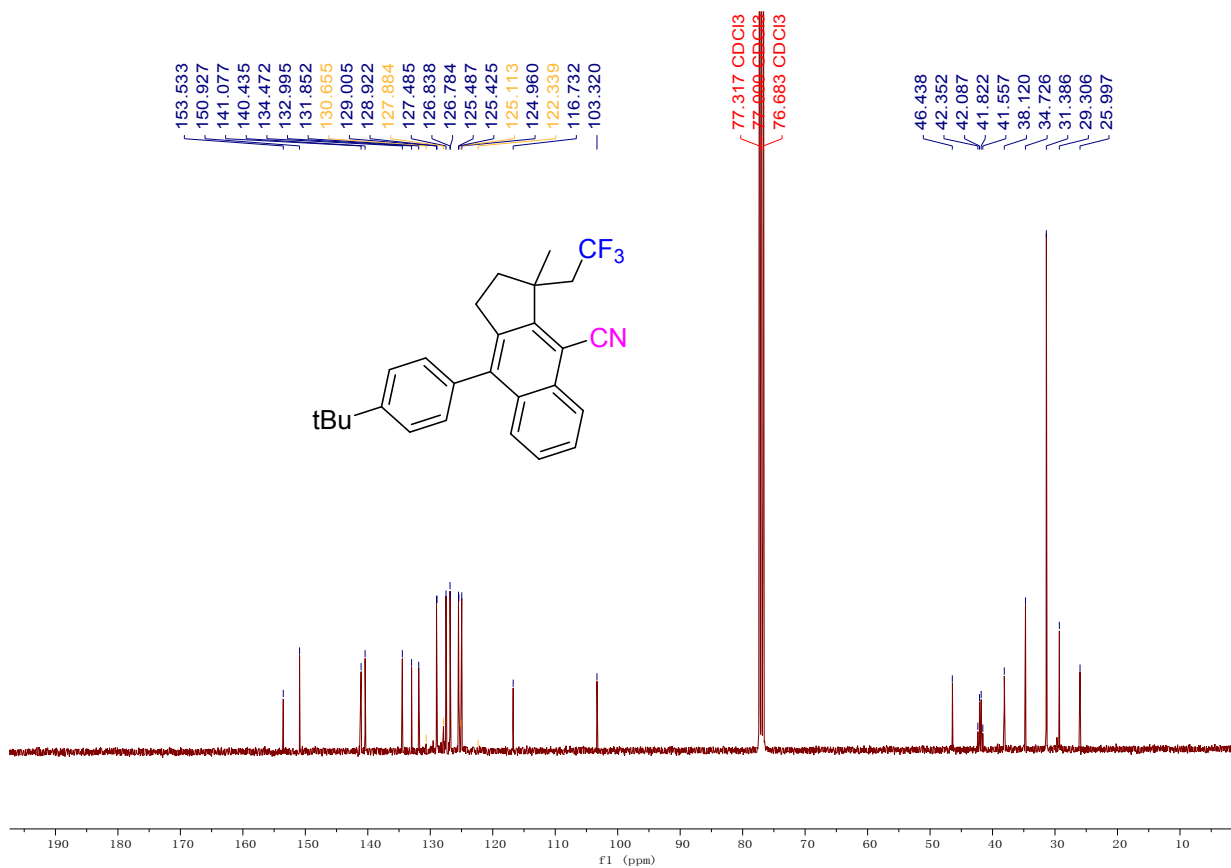

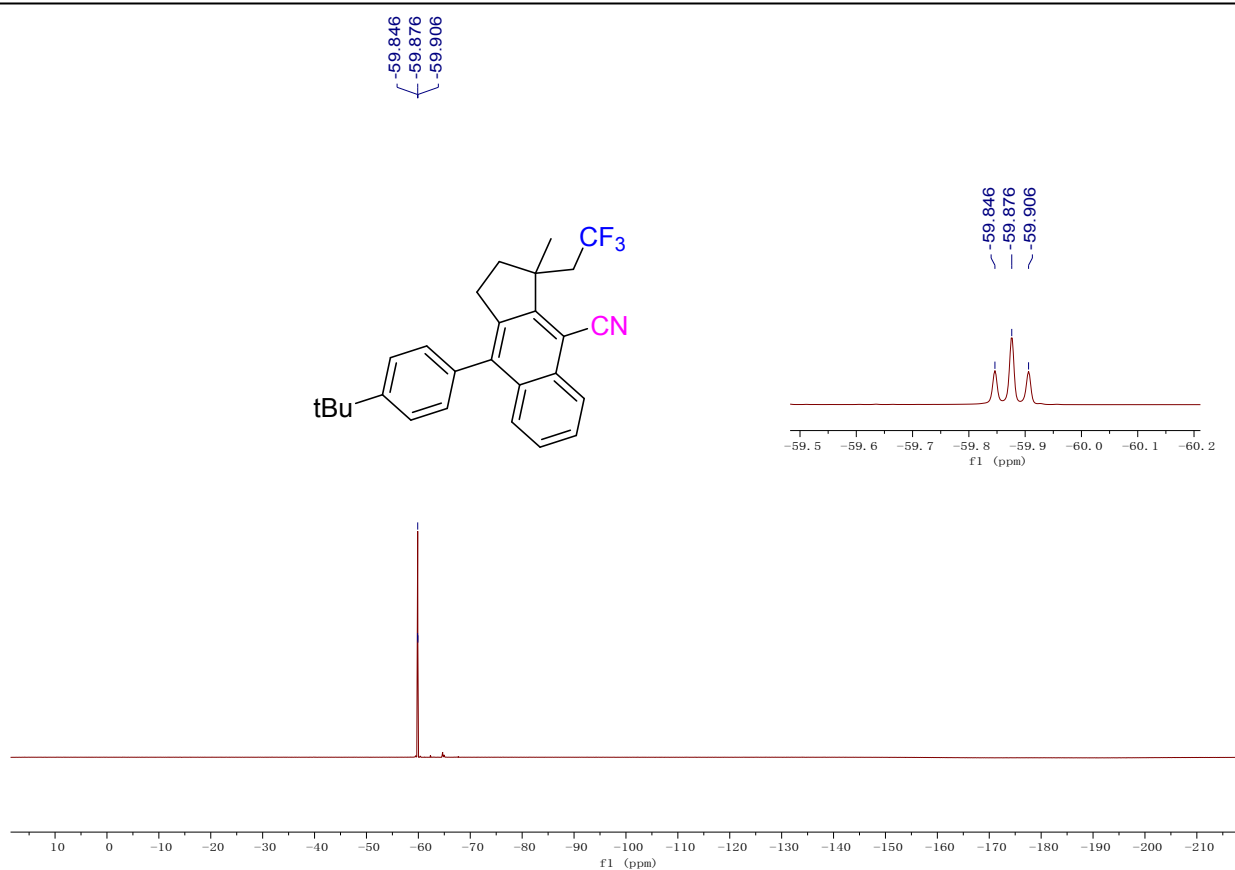

**9-([1,1'-biphenyl]-4-yl)-3-methyl-3-(2,2,2-trifluoroethyl)-2,3-dihydro-1H-cyclopenta[b]naphthalene-4-carbonitrile (2d)**

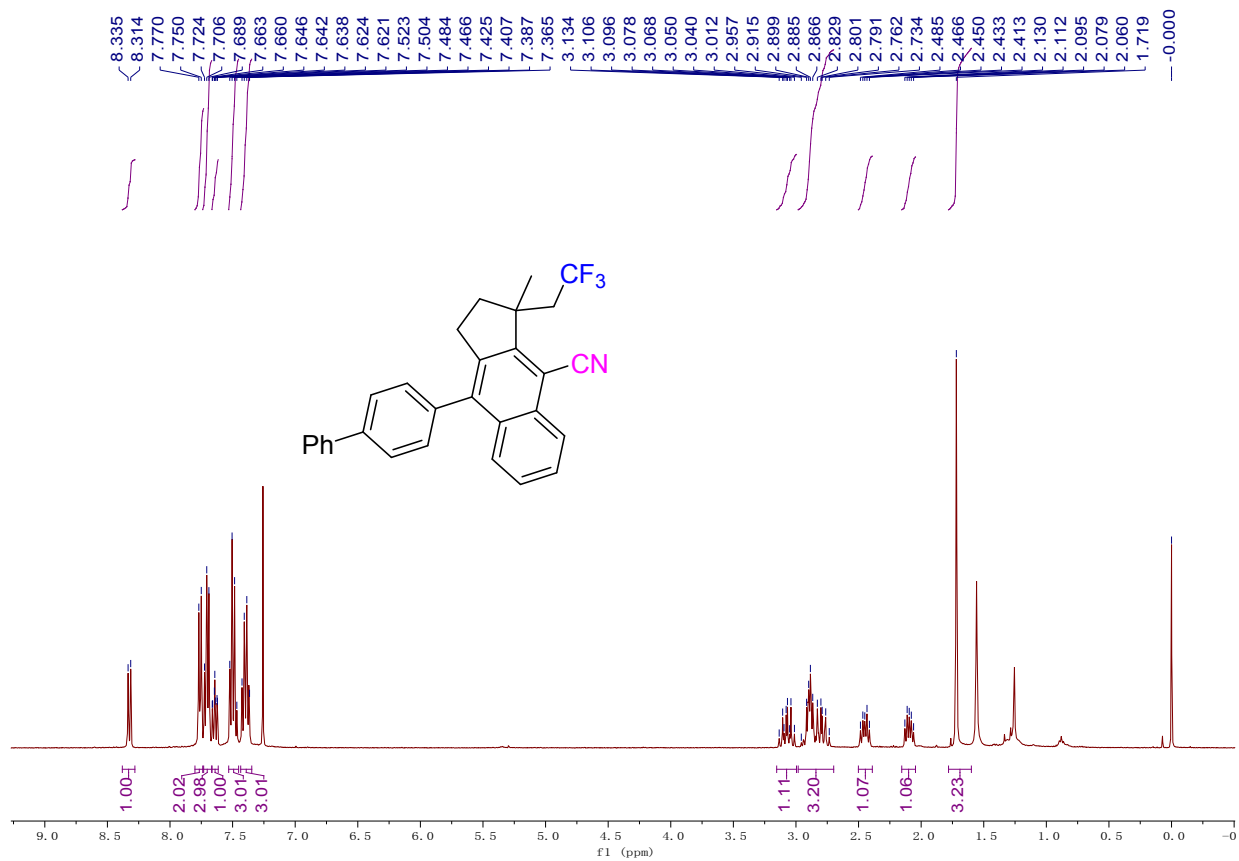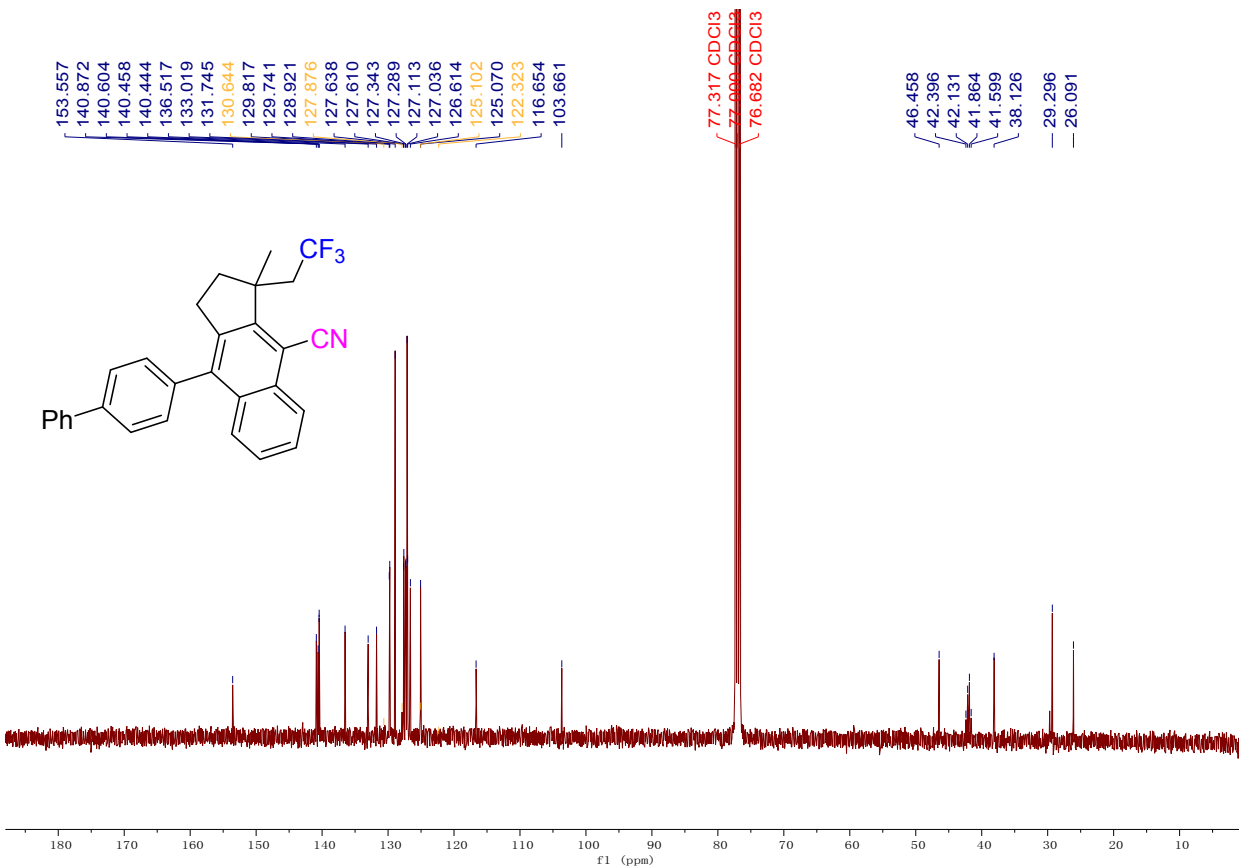

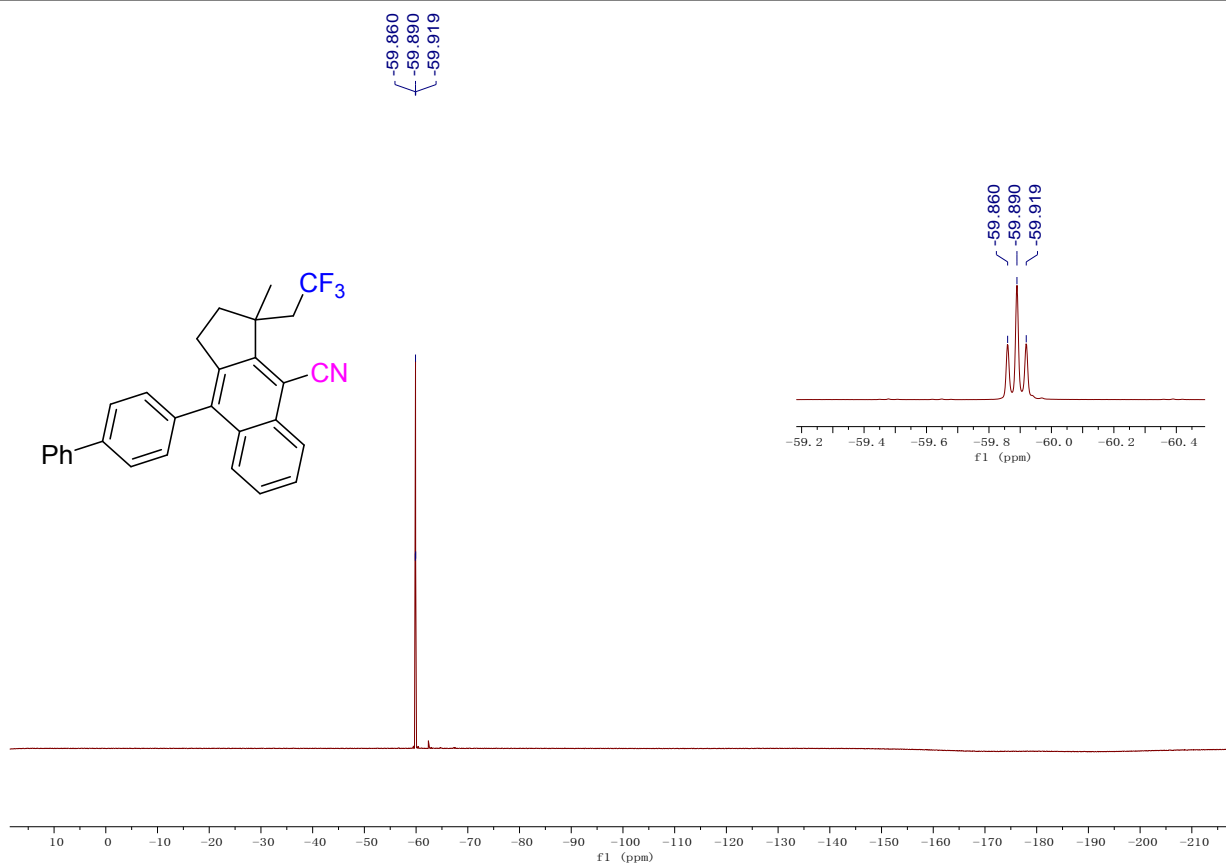

**3-methyl-9-(*p*-tolyl)-3-(2,2,2-trifluoroethyl)-2,3-dihydro-1*H*-cyclopenta[*b*]naphthalene-4-carbonitrile (2e)**



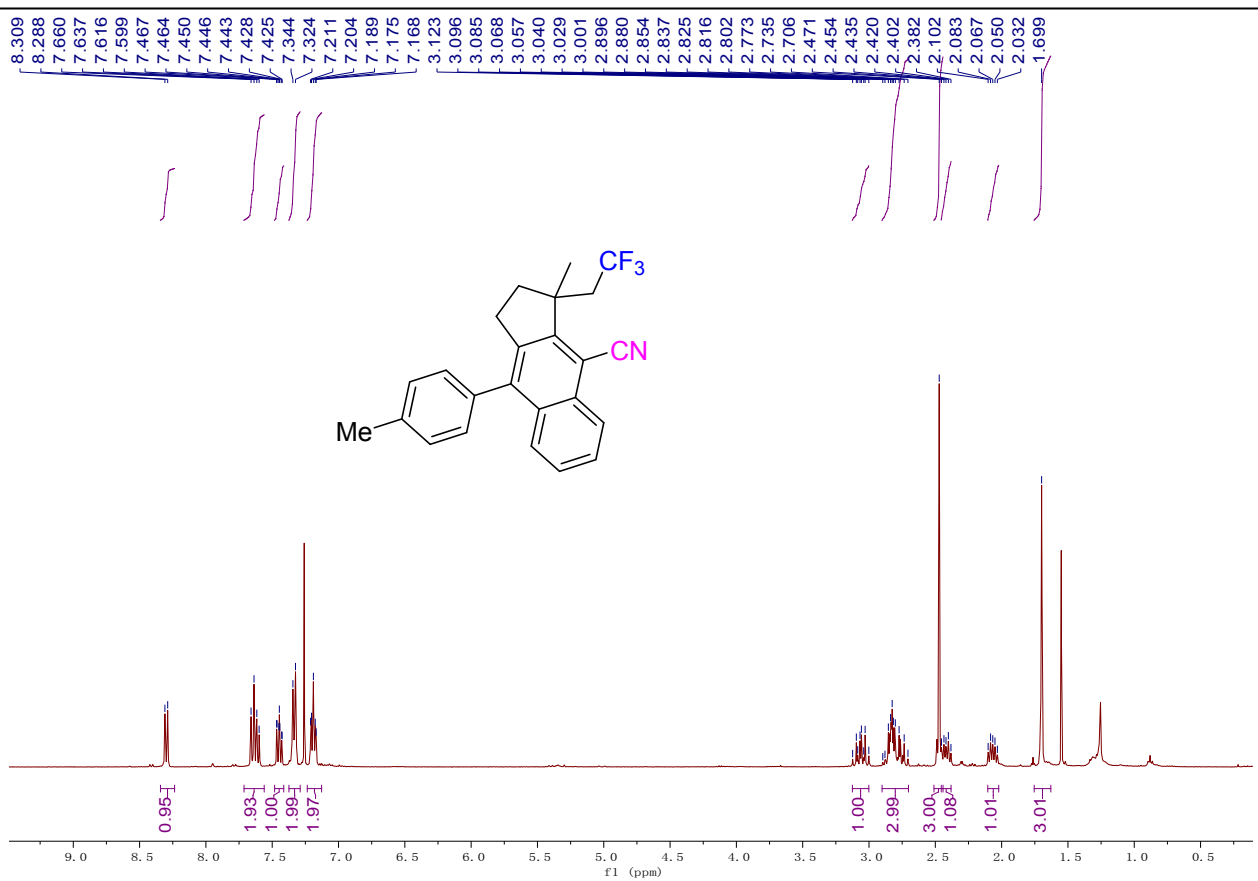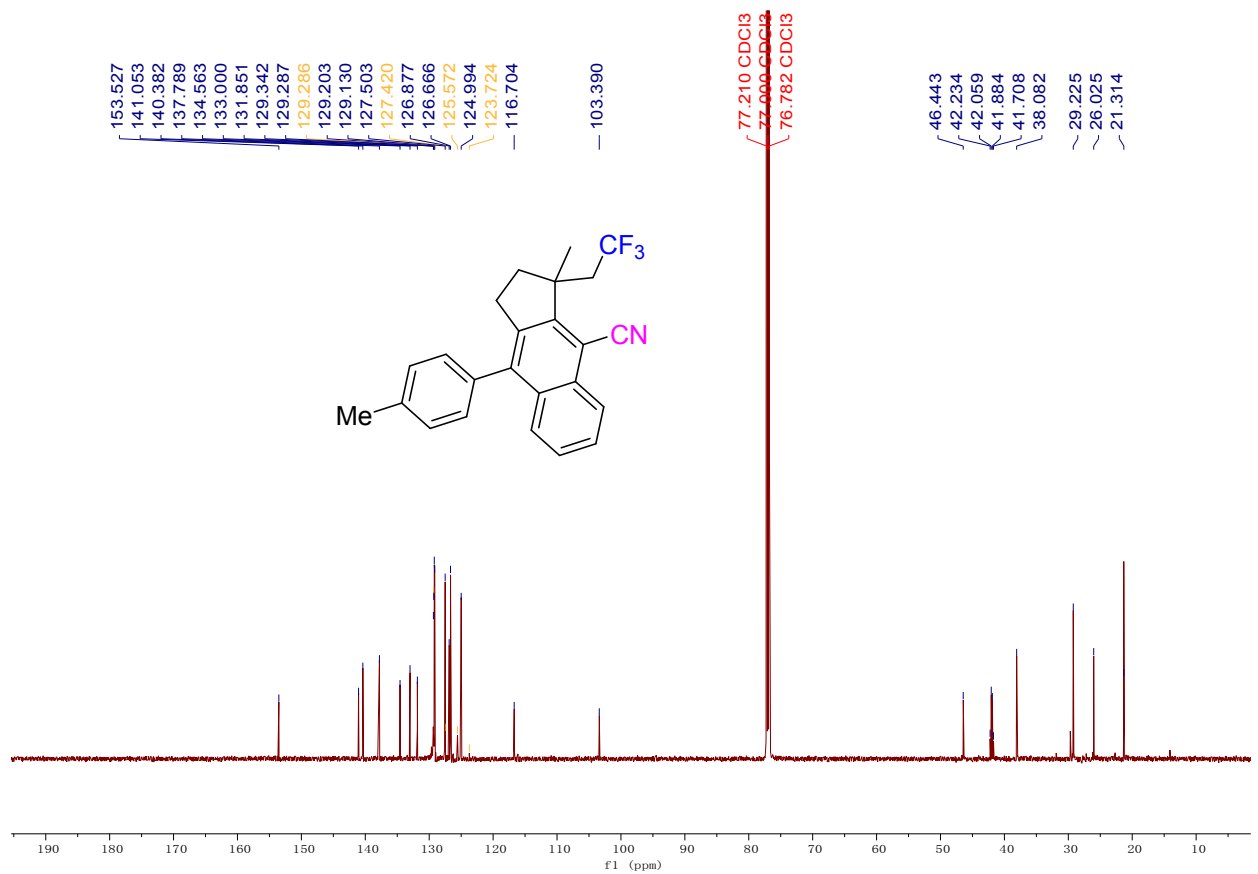

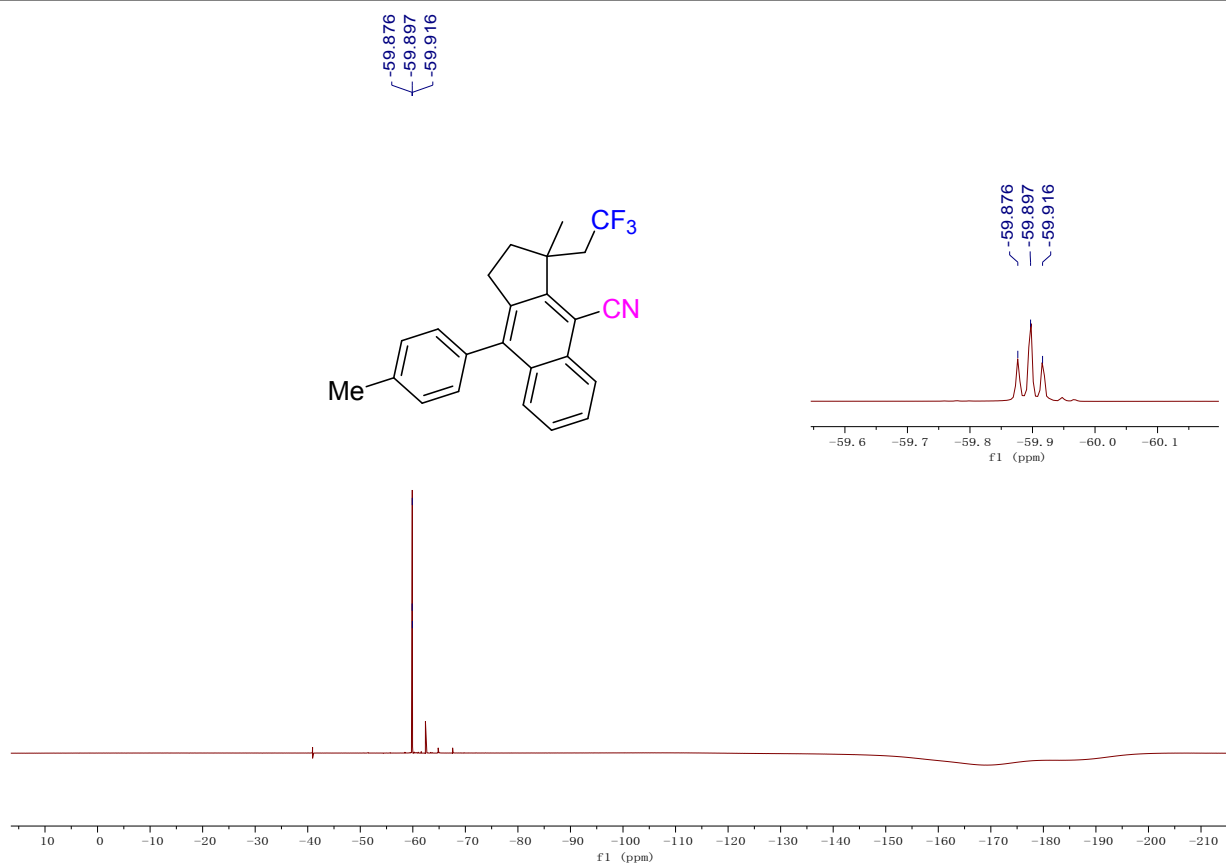

**9-(3-chlorophenyl)-3-methyl-3-(2,2,2-trifluoroethyl)-2,3-dihydro-1H-cyclopenta[b]naphthalene-4-carbonitrile (2f)**

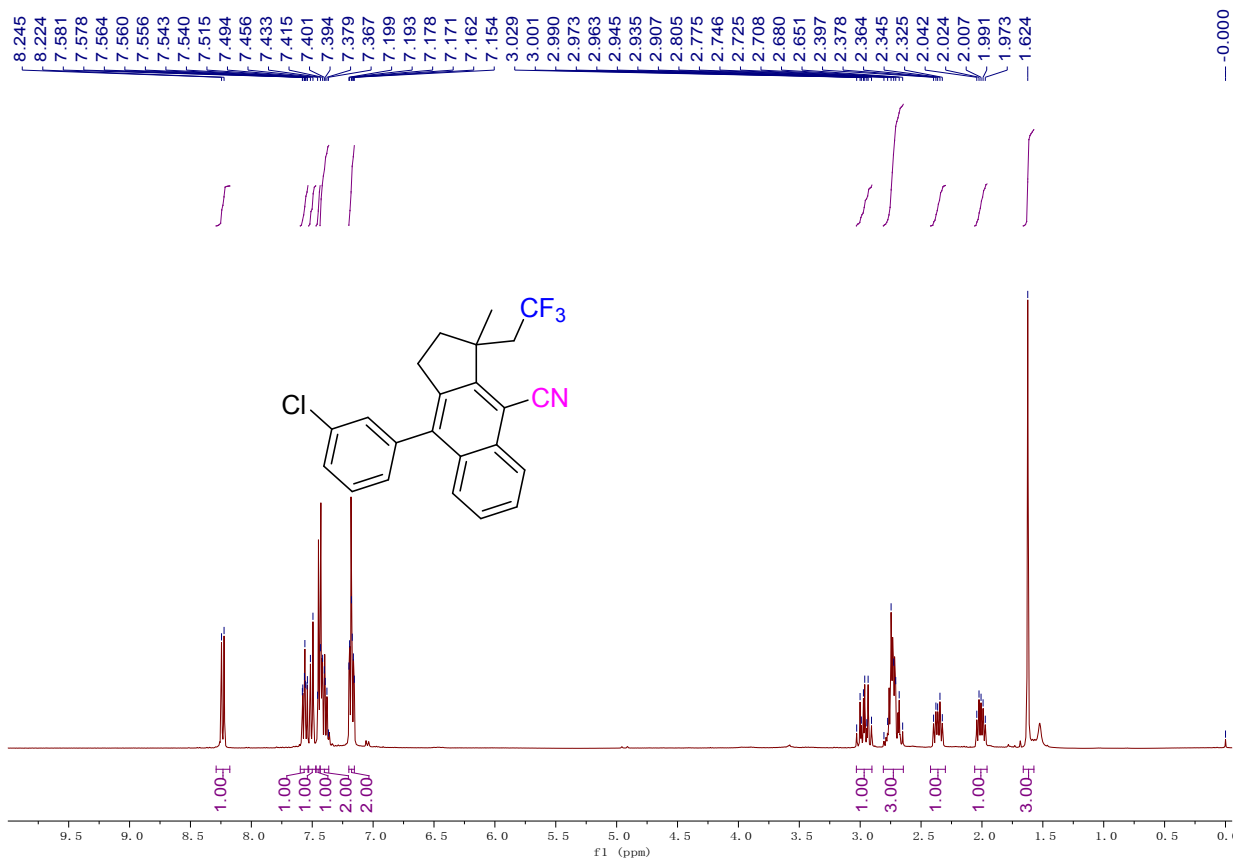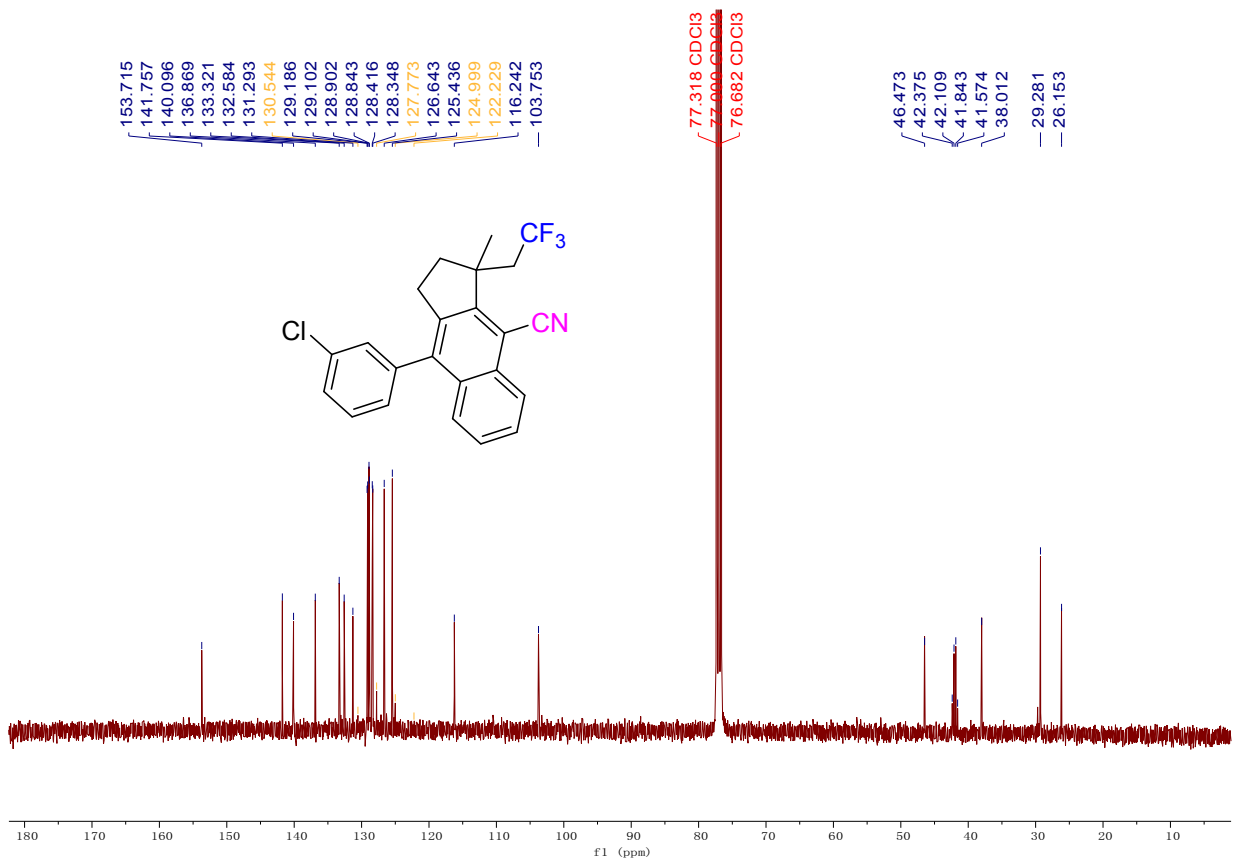

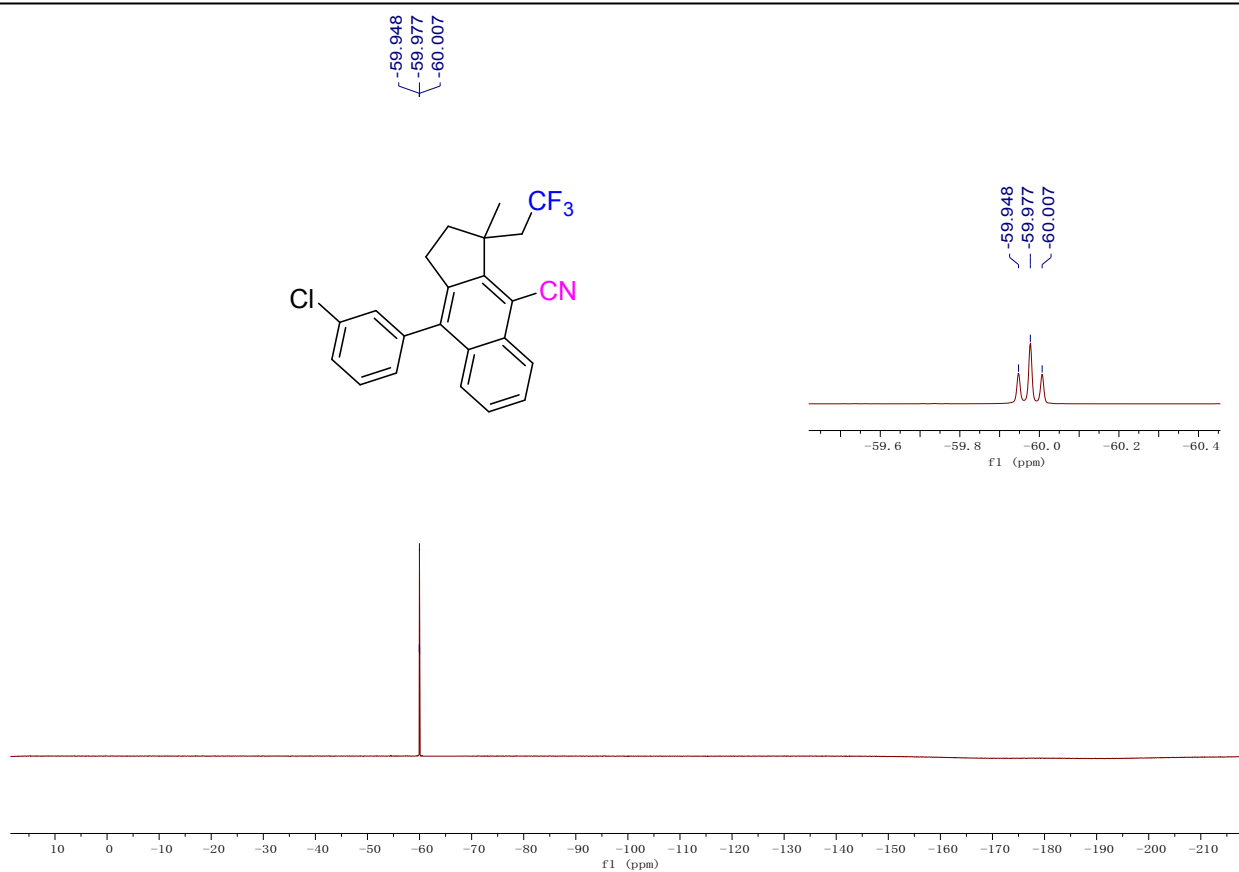

**3-methyl-9-(*m*-tolyl)-3-(2,2,2-trifluoroethyl)-2,3-dihydro-1*H*-cyclopenta[*b*]naphthalene-4-carbonitrile (2g)**

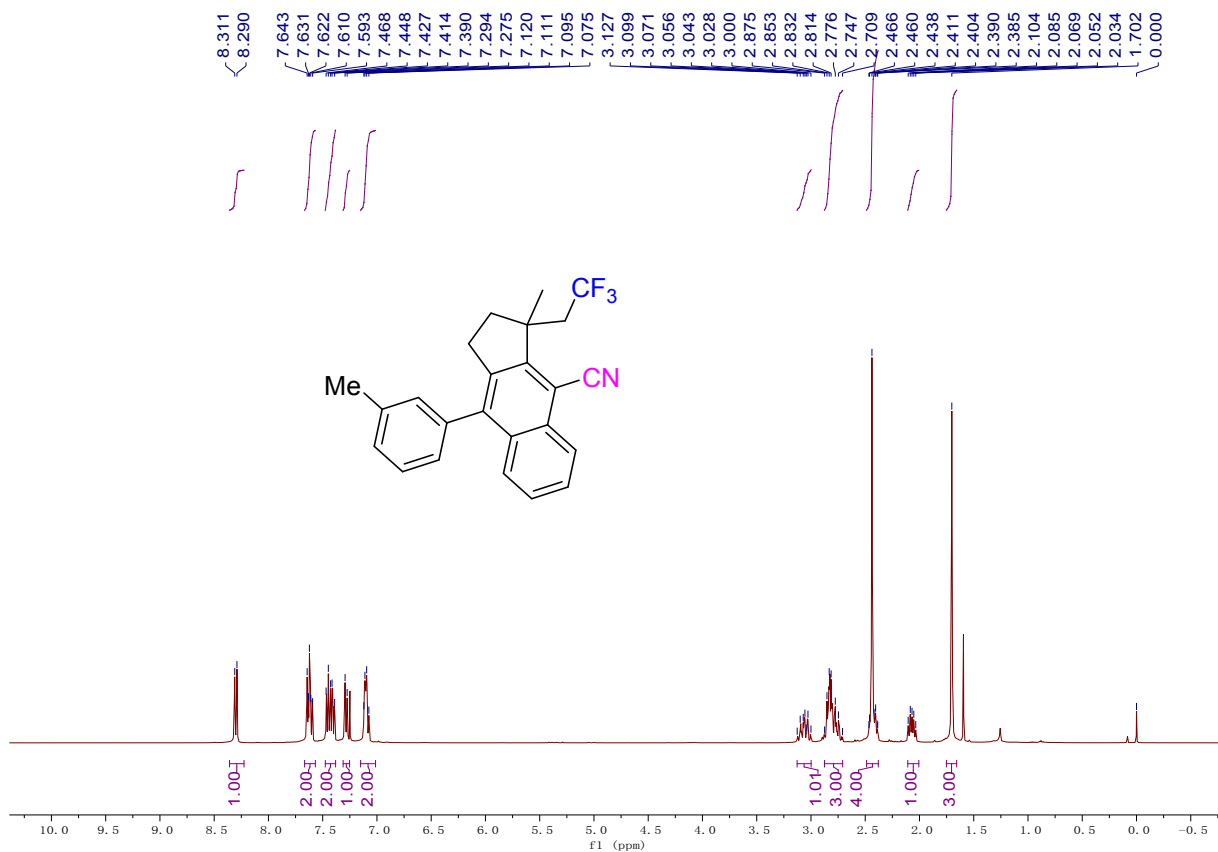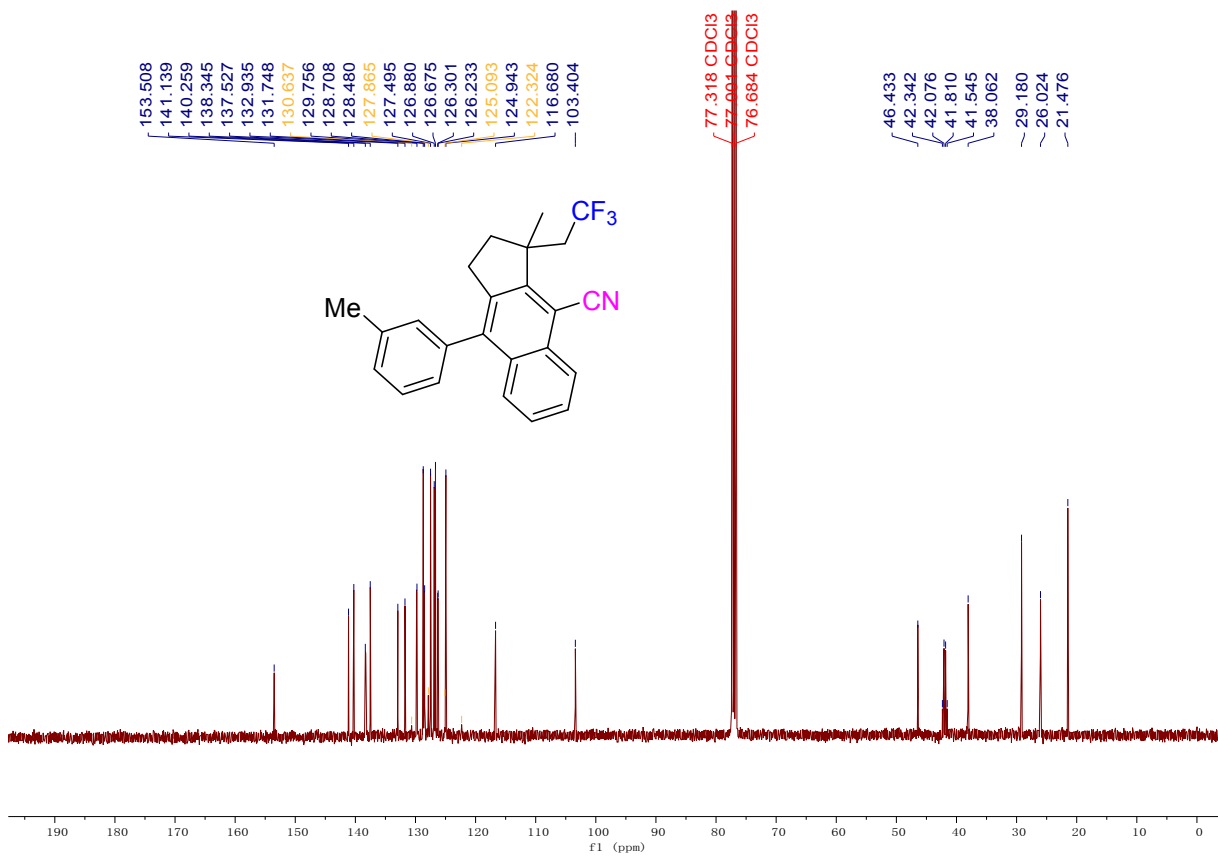

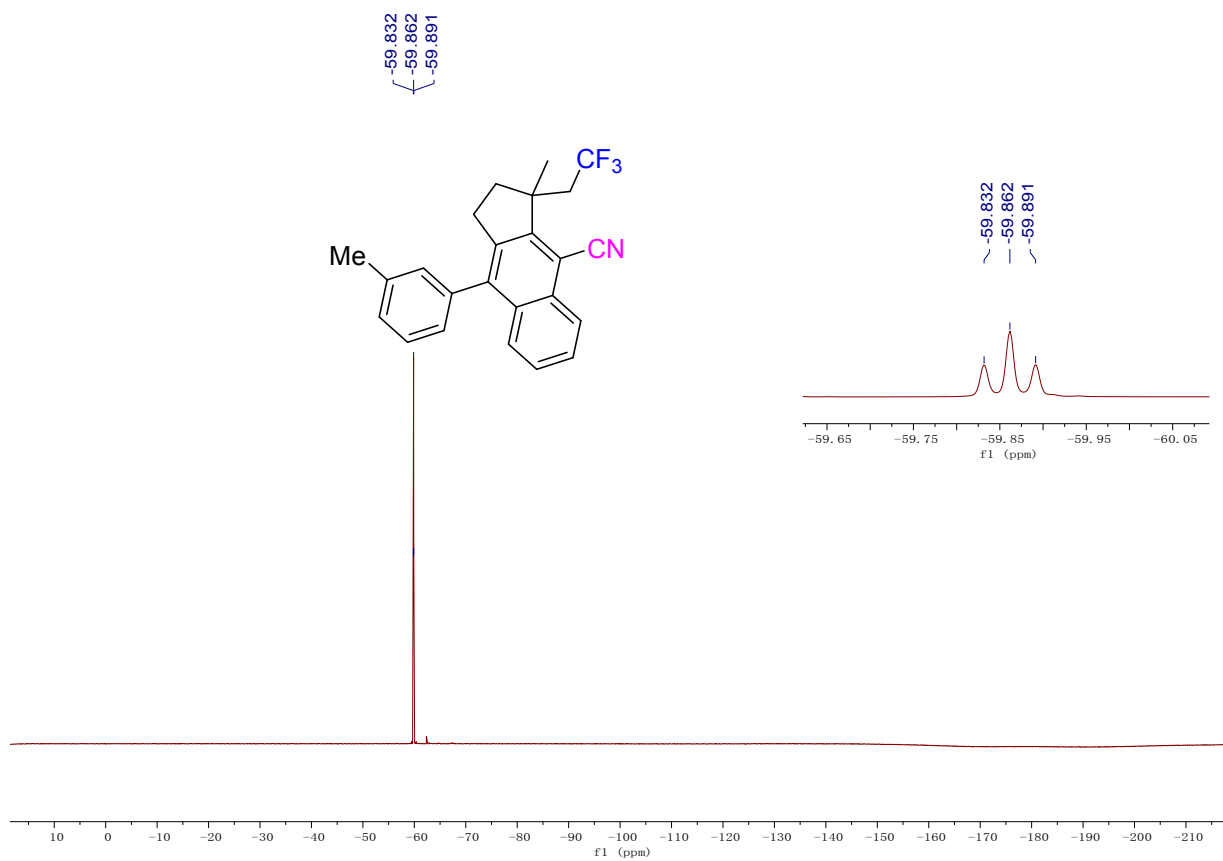

**7-chloro-3-methyl-9-phenyl-3-(2,2,2-trifluoroethyl)-2,3-dihydro-1H-cyclopenta[b]naphthalene-4-carbonitrile (2h)**

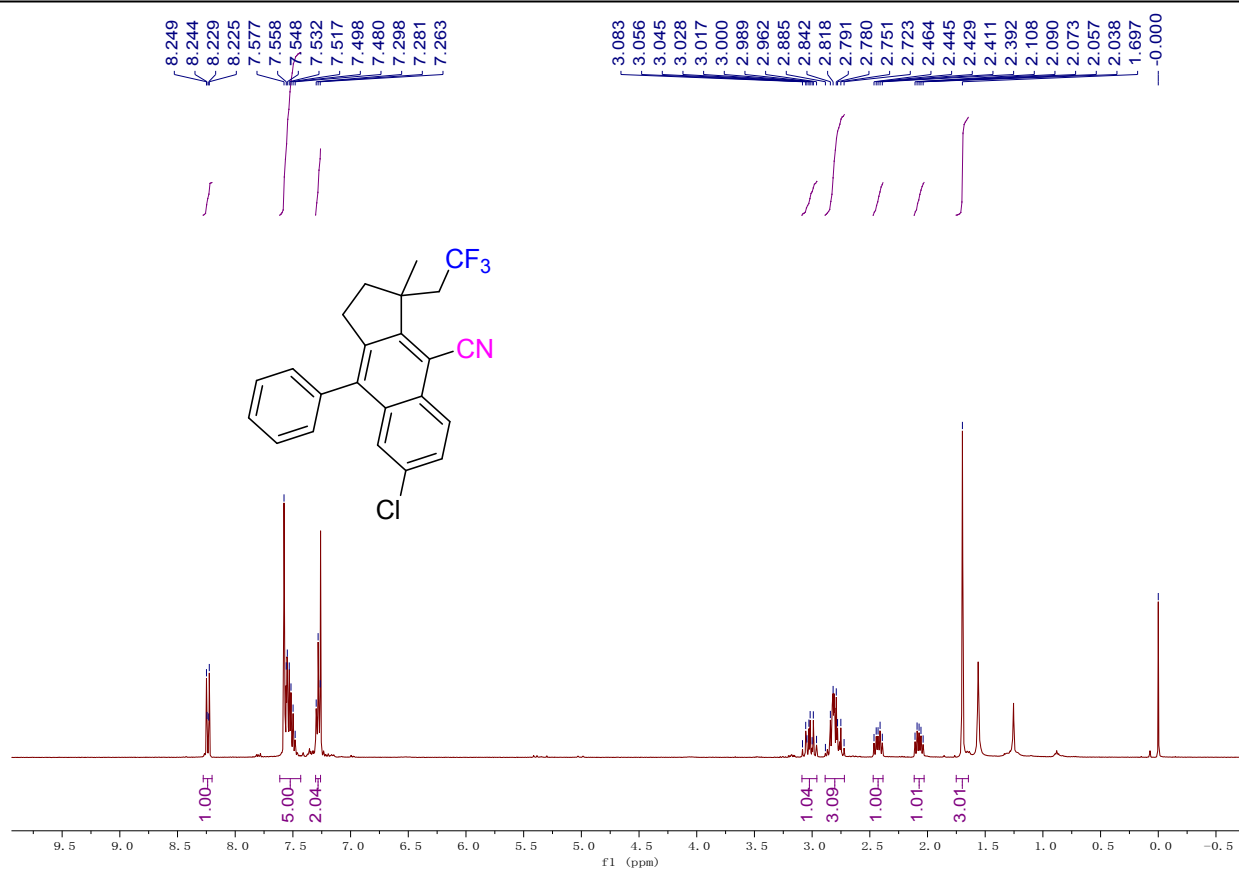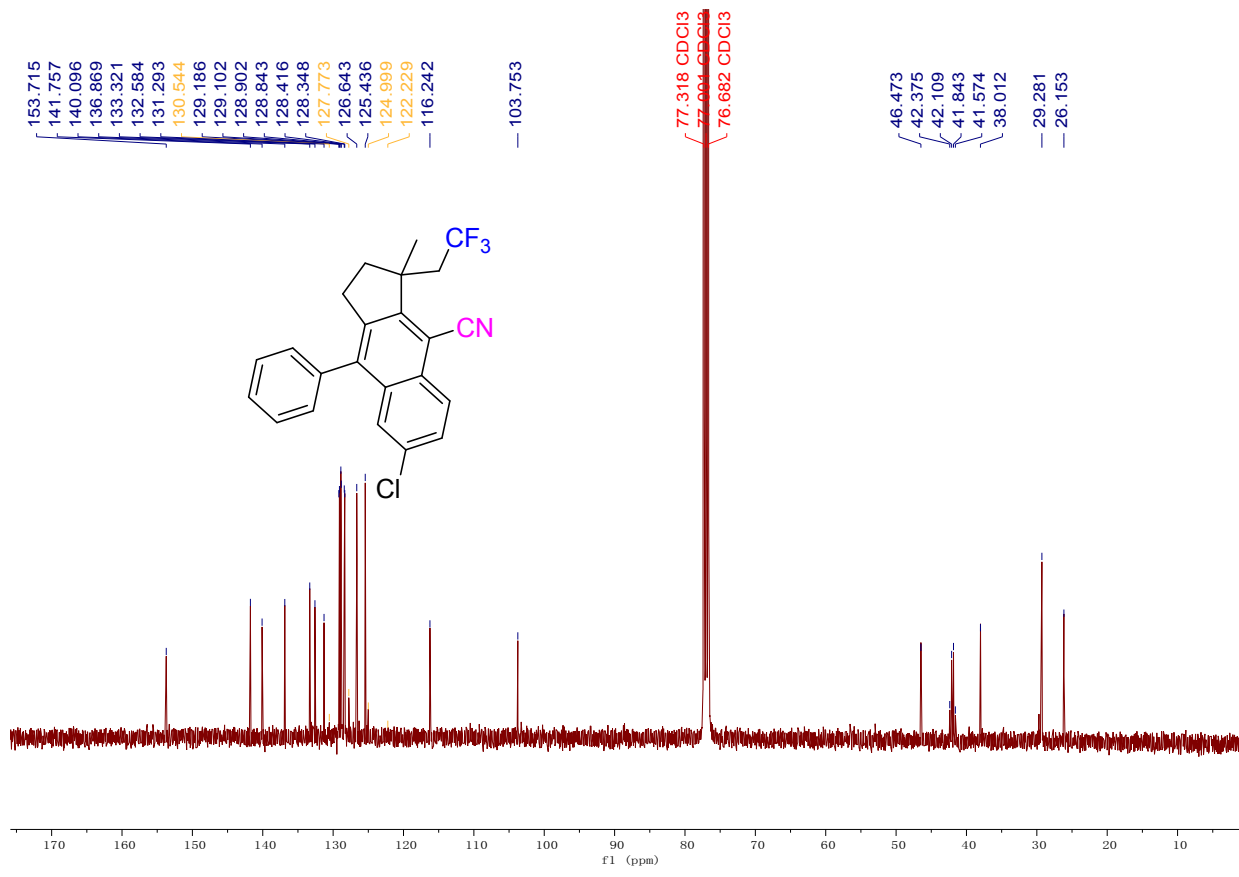

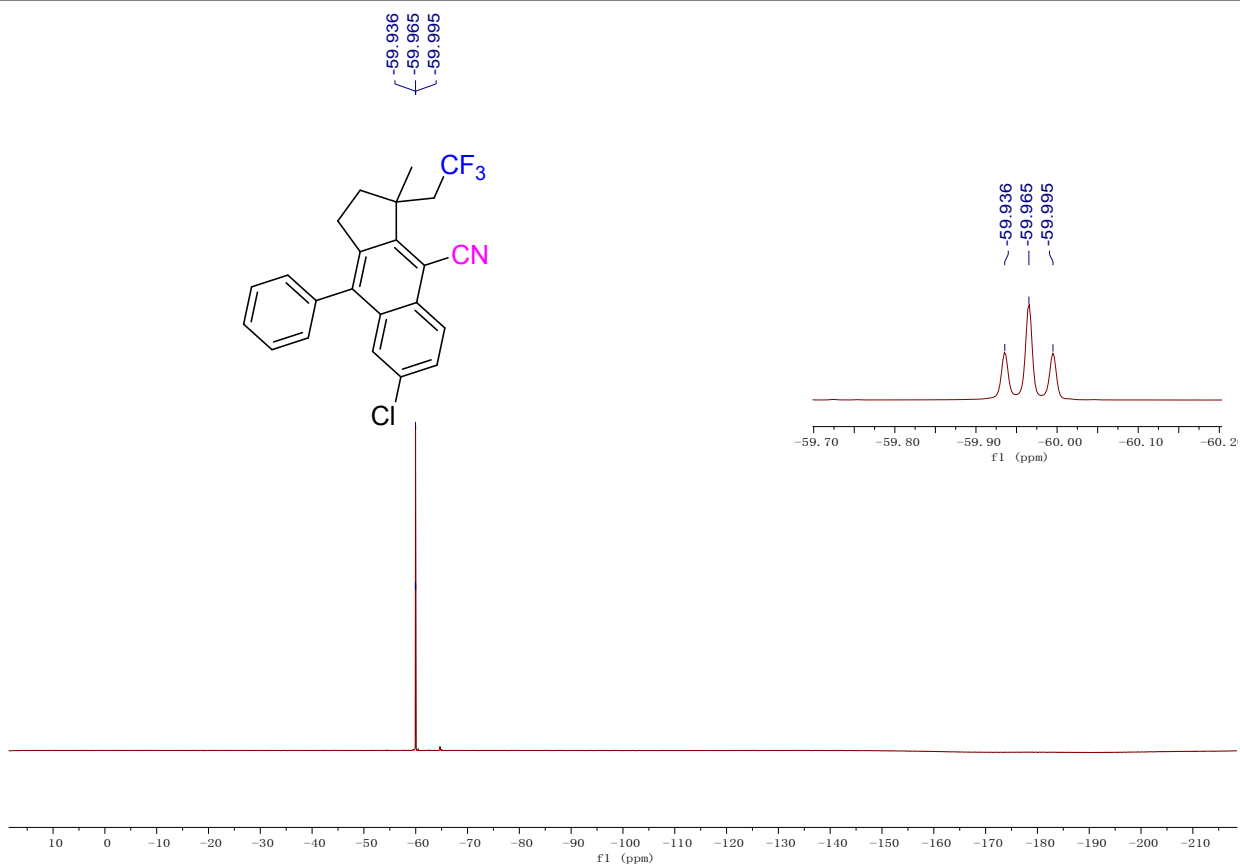

**7-chloro-9-(2-fluorophenyl)-3-methyl-3-(2,2,2-trifluoroethyl)-2,3-dihydro-1H-cyclopenta[b]naphthalene-4-carbonitrile (2i)**



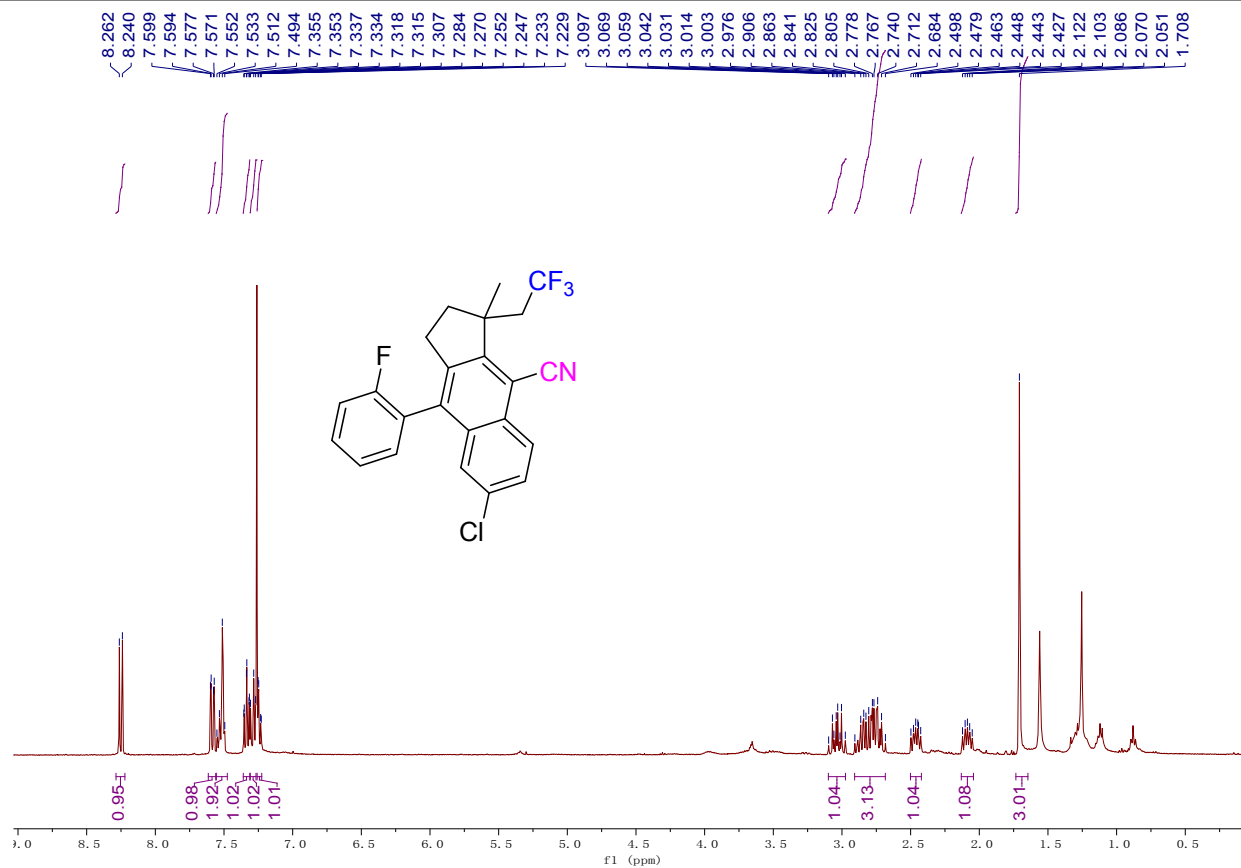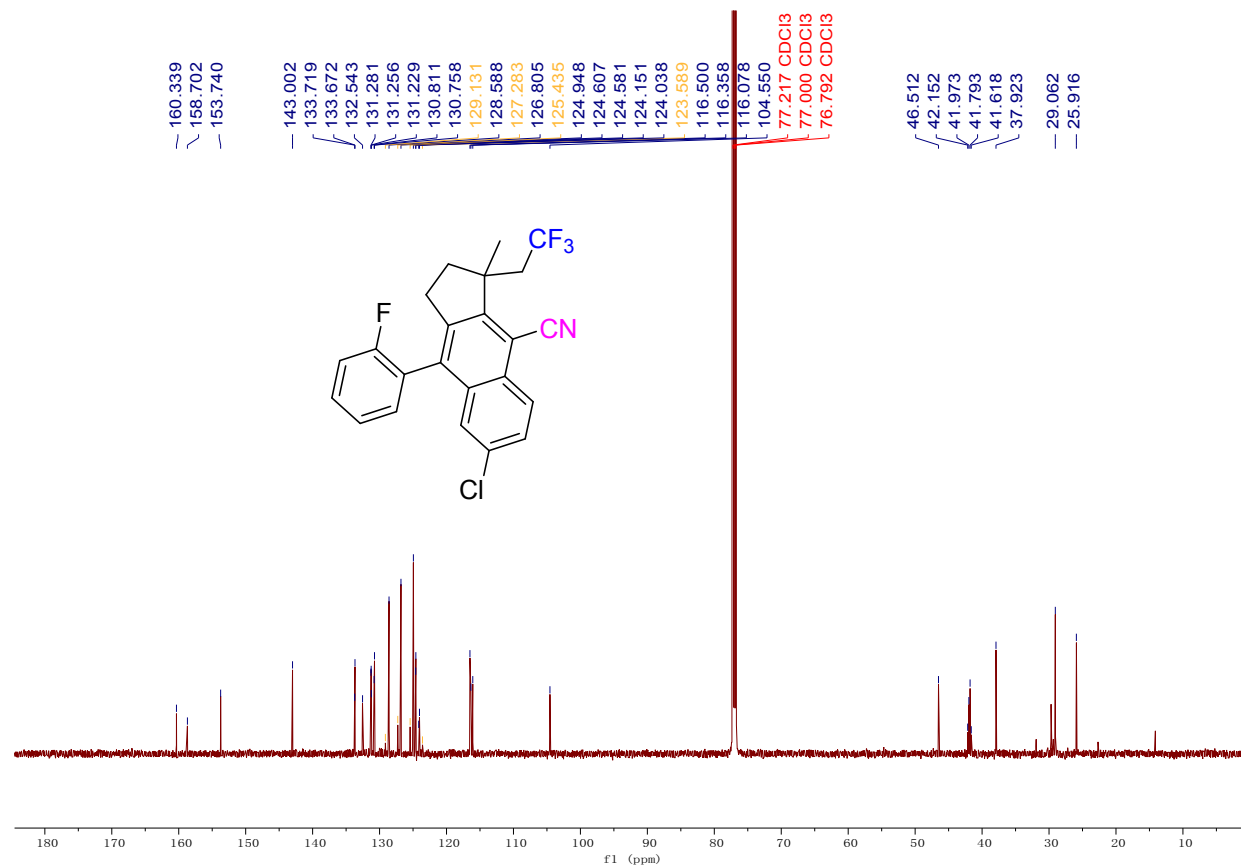

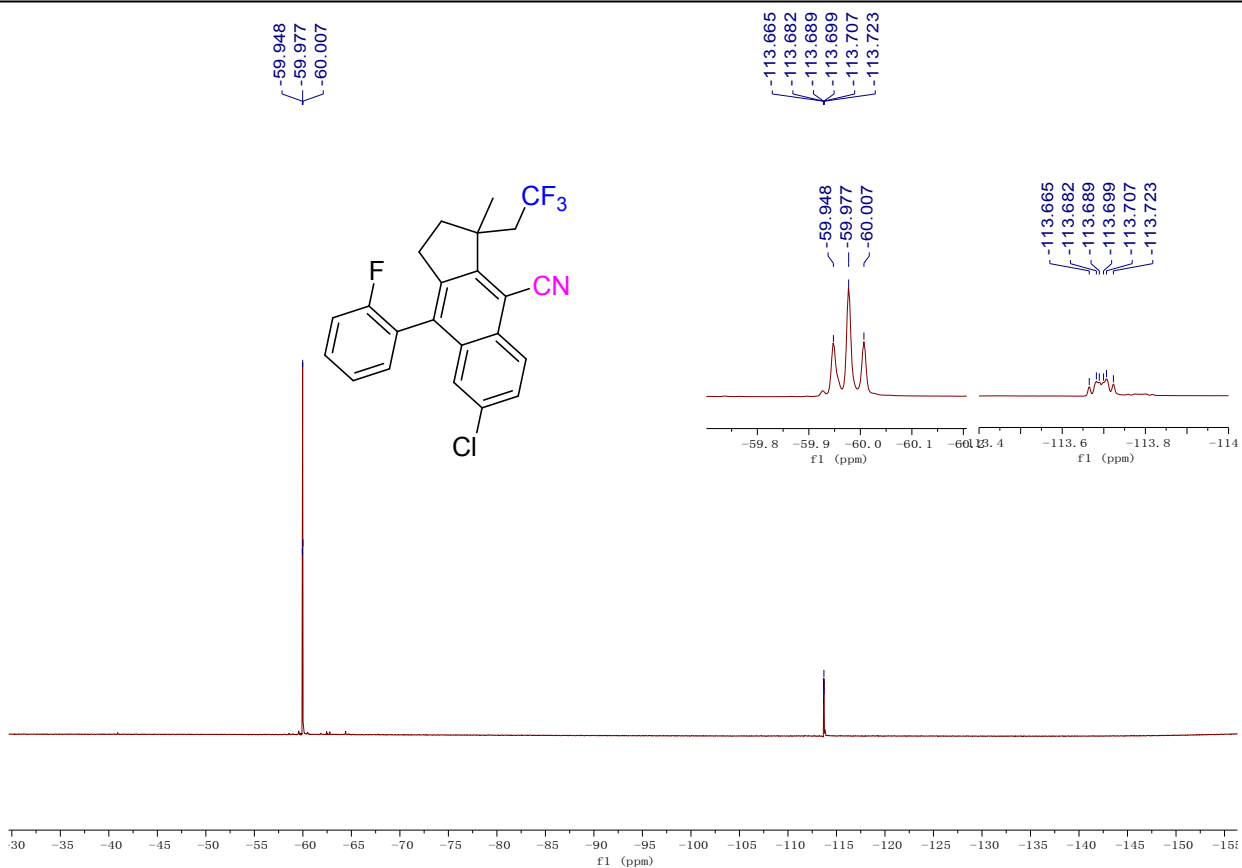

**7-chloro-9-(2-chlorophenyl)-3-methyl-3-(2,2,2-trifluoroethyl)-2,3-dihydro-1H-cyclopenta[b]naphthalene-4-carbonitrile (2j)**

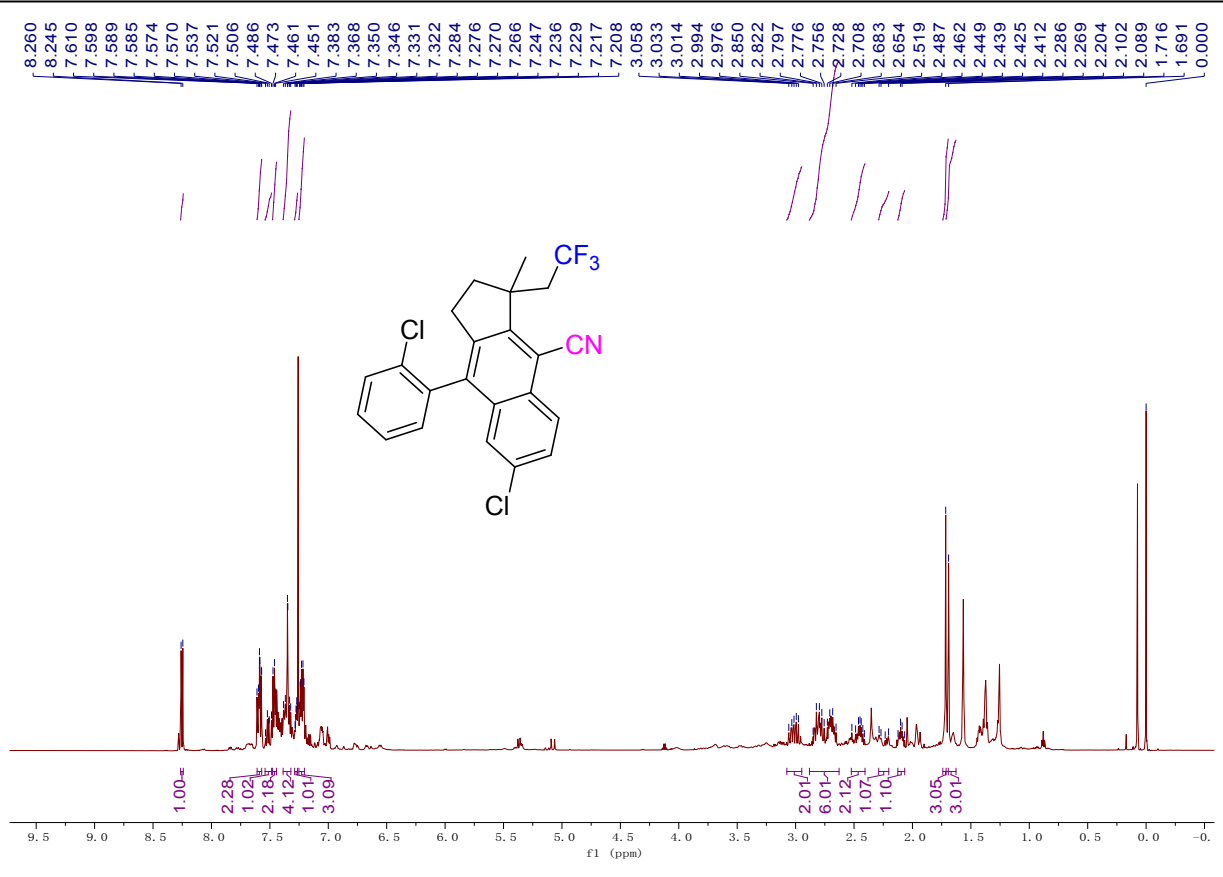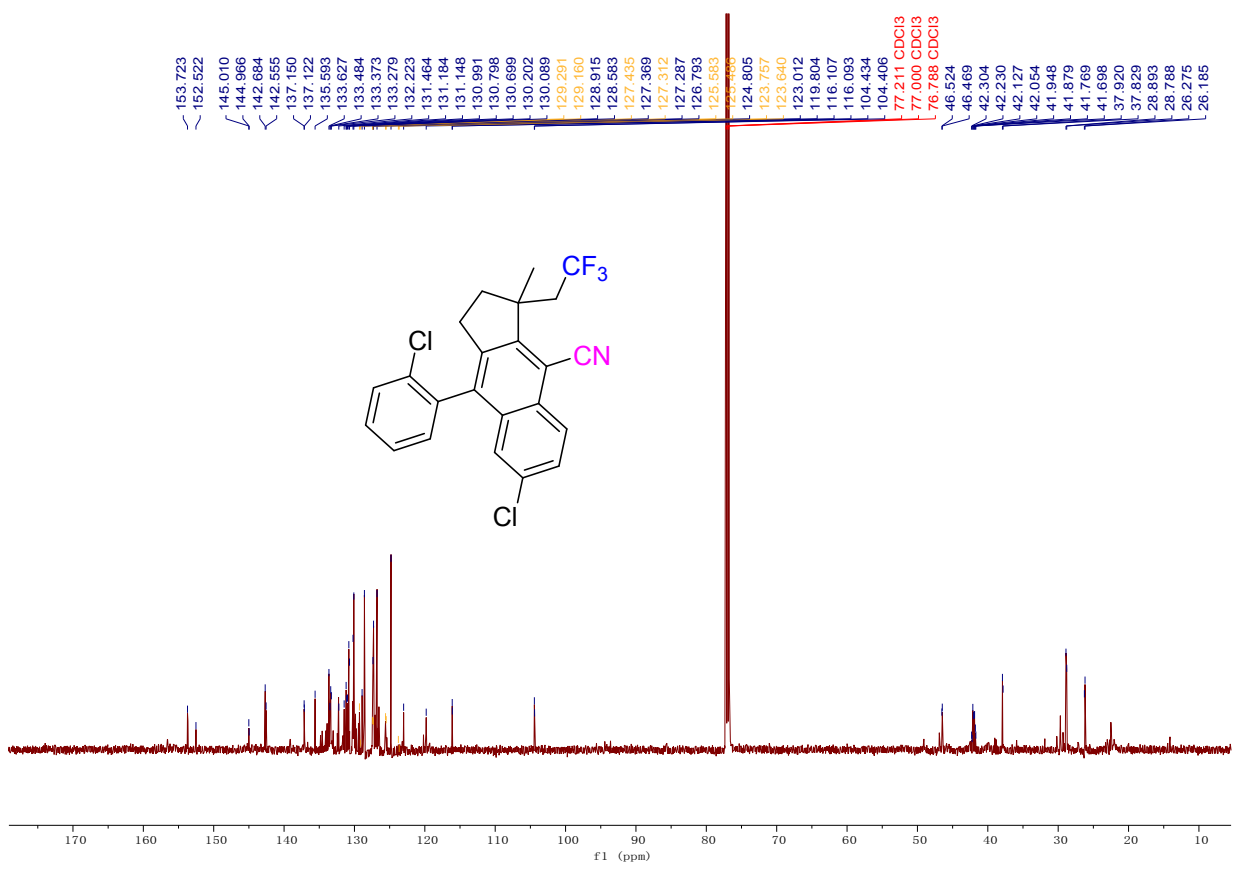

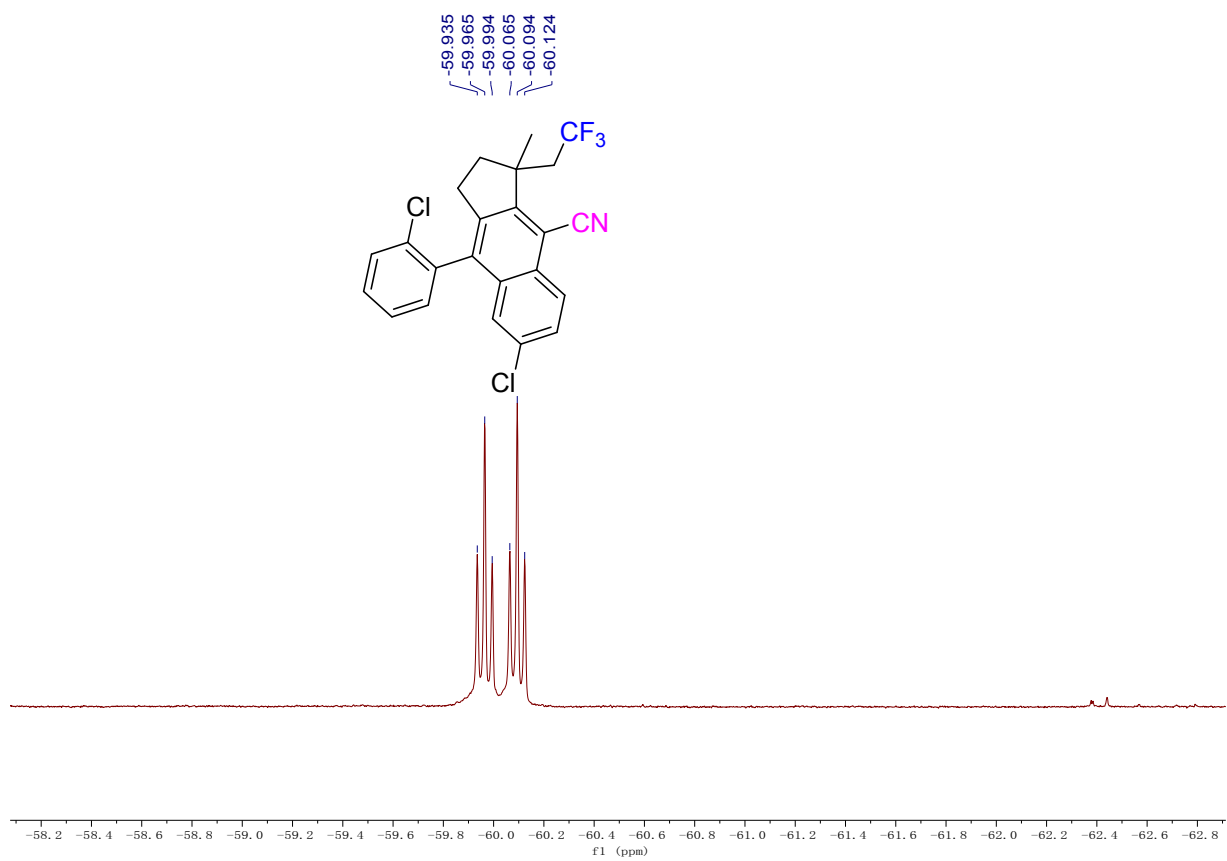

**3,6-dimethyl-9-phenyl-3-(2,2,2-trifluoroethyl)-2,3-dihydro-1H-cyclopenta[b]naphthalene-4-carbonitrile (2k) + 7-methyl-4-phenyl-2-(4,4,4-trifluorobutan-2-yl)-3-vinyl-1-naphthonitrile (3k)**



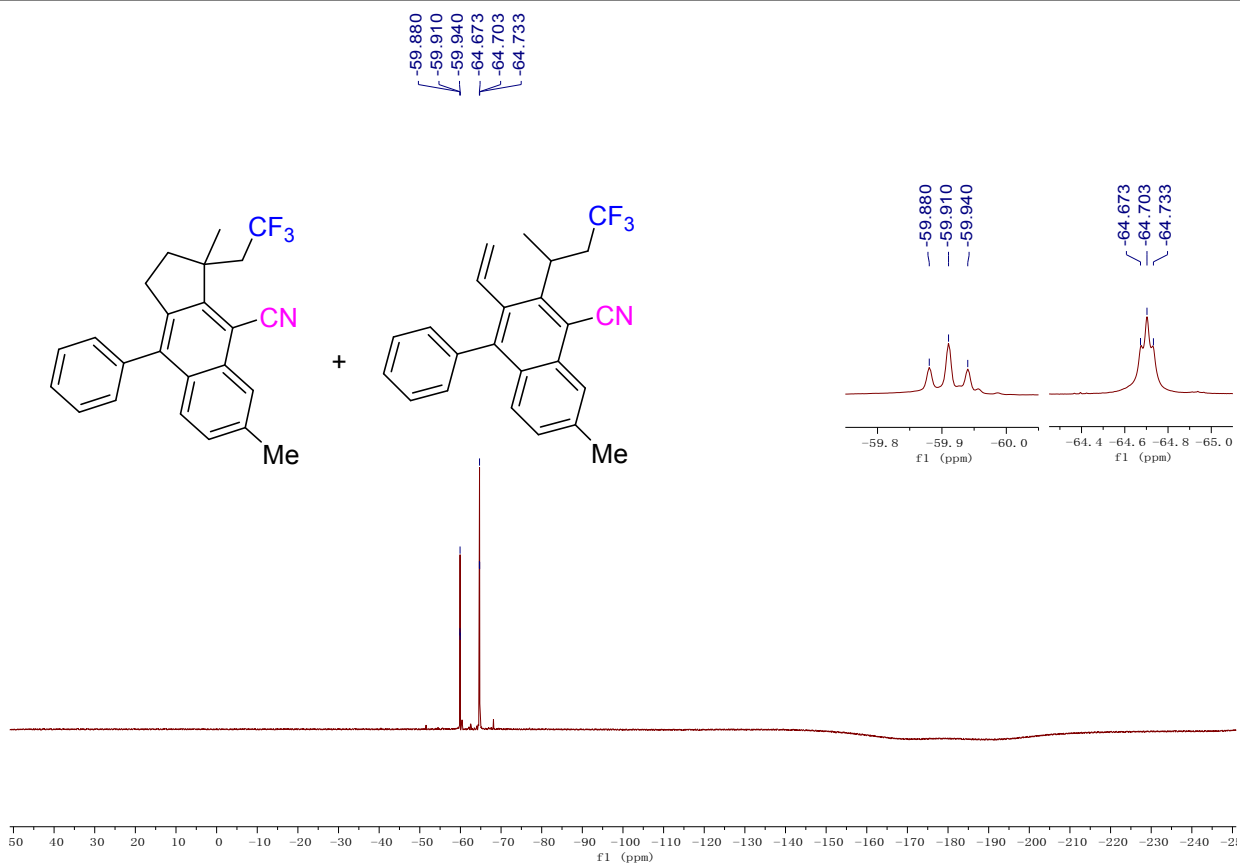

### 3-methyl-3-(2,2,2-trifluoroethyl)-2,3-dihydro-1H-cyclopenta[b]naphthalene-4-carbonitrile (2l)

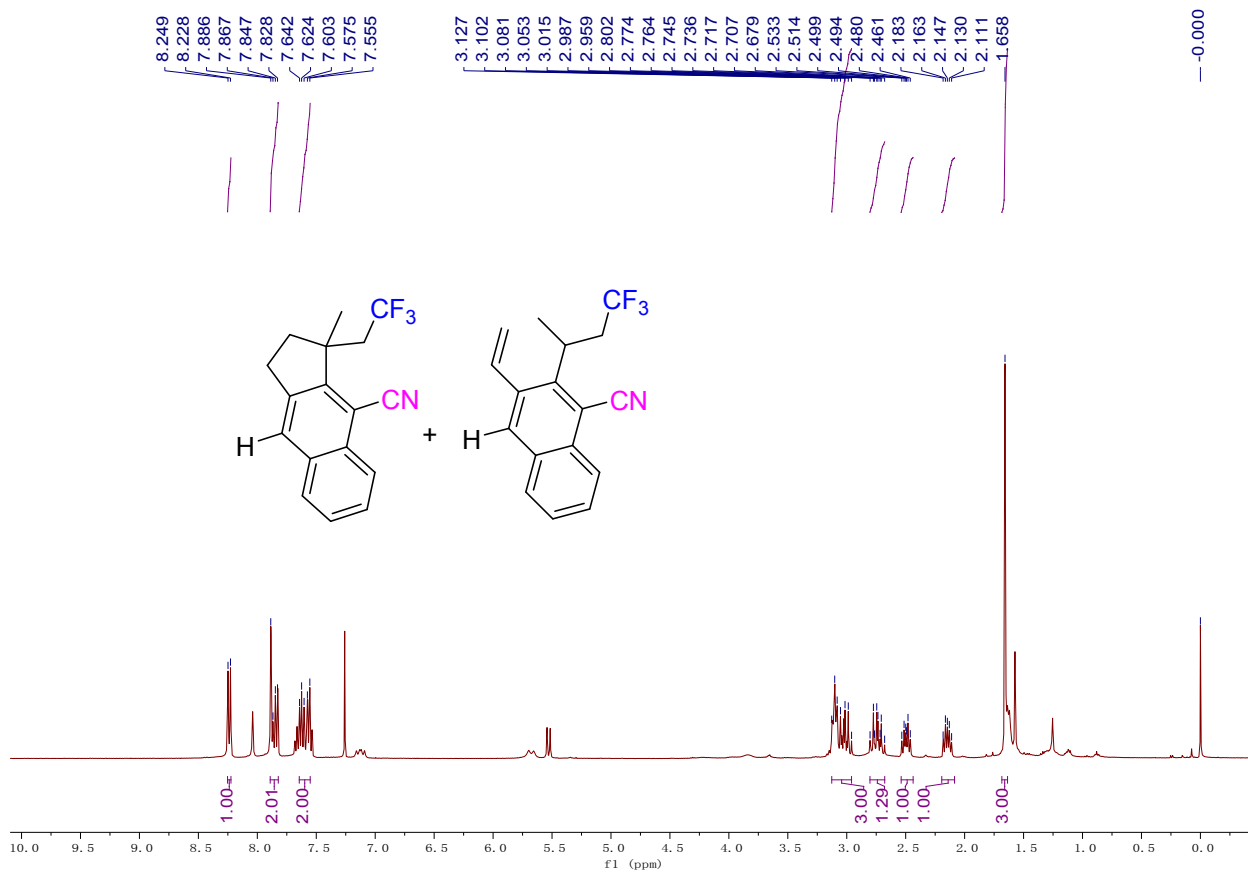

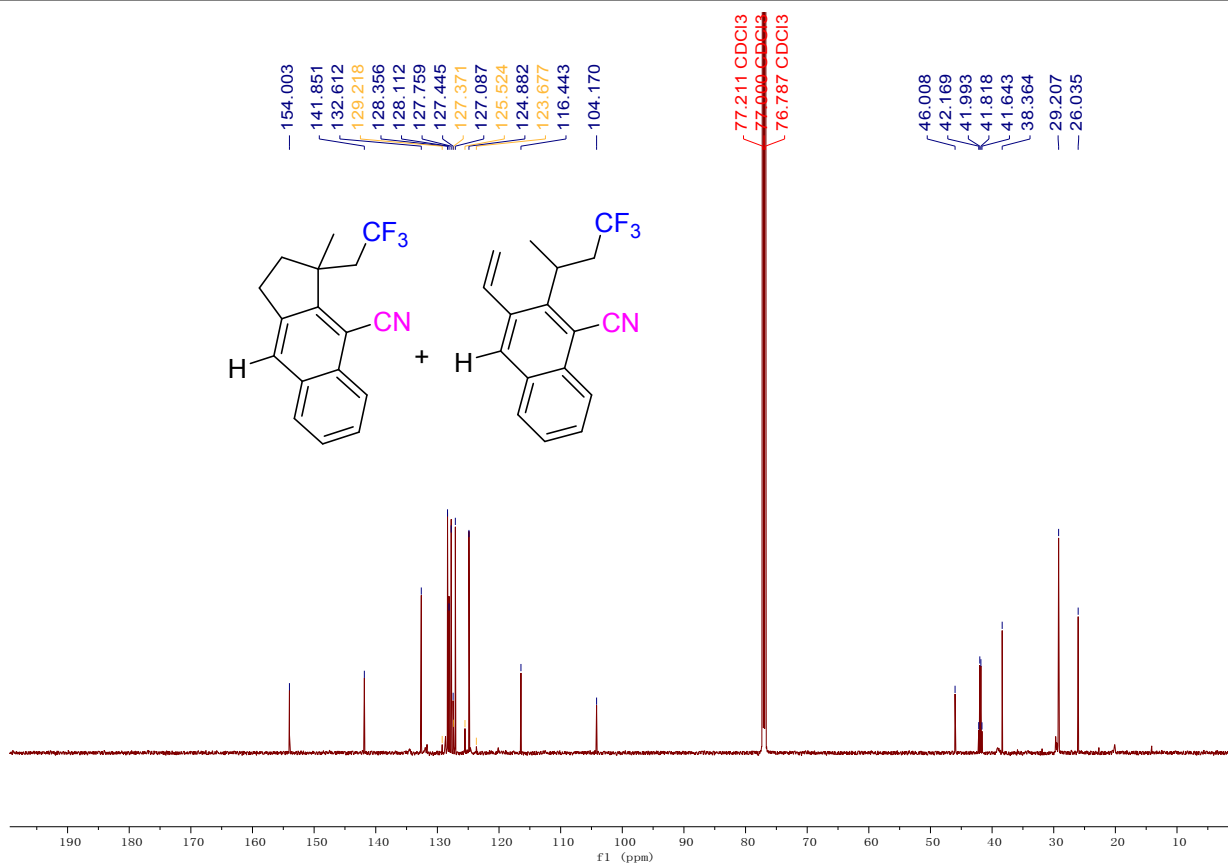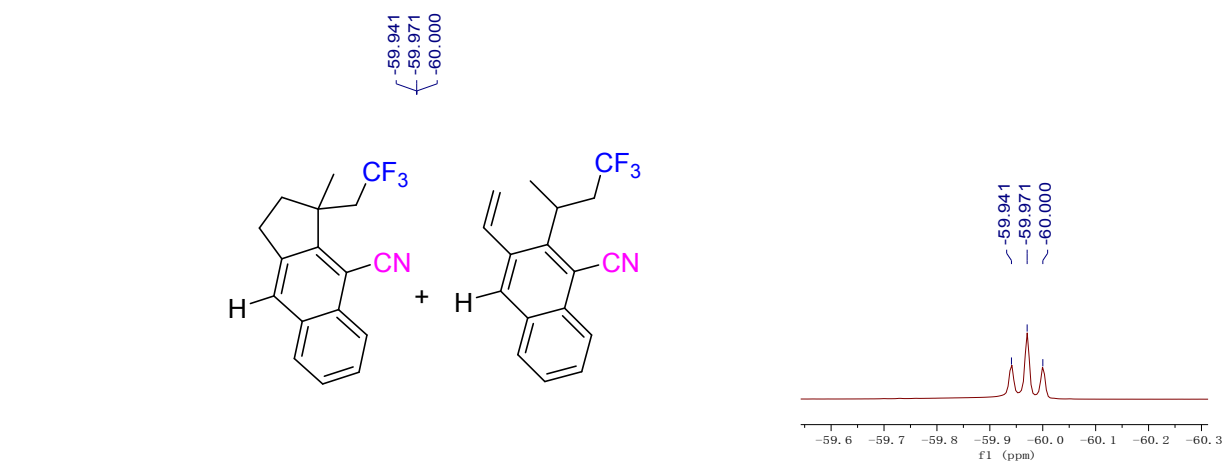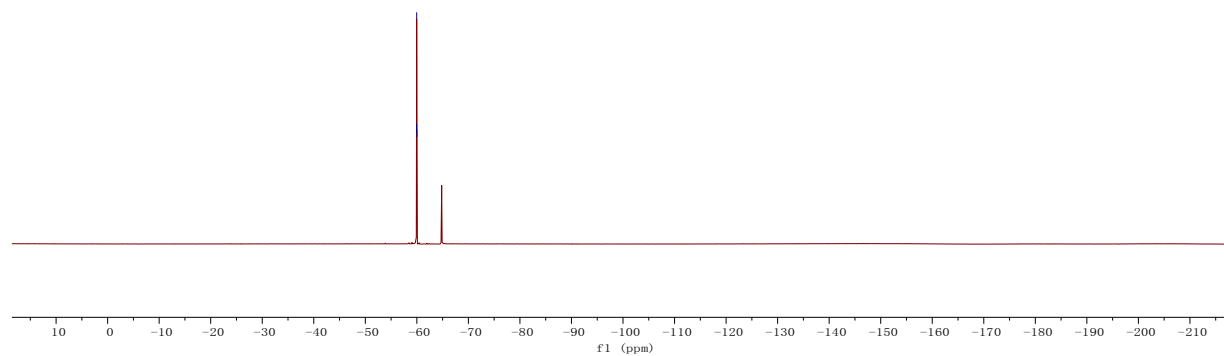

**8-fluoro-3-methyl-3-(2,2,2-trifluoroethyl)-2,3-dihydro-1H-cyclopenta[b]naphthalene-4-carbonitrile (2m)**

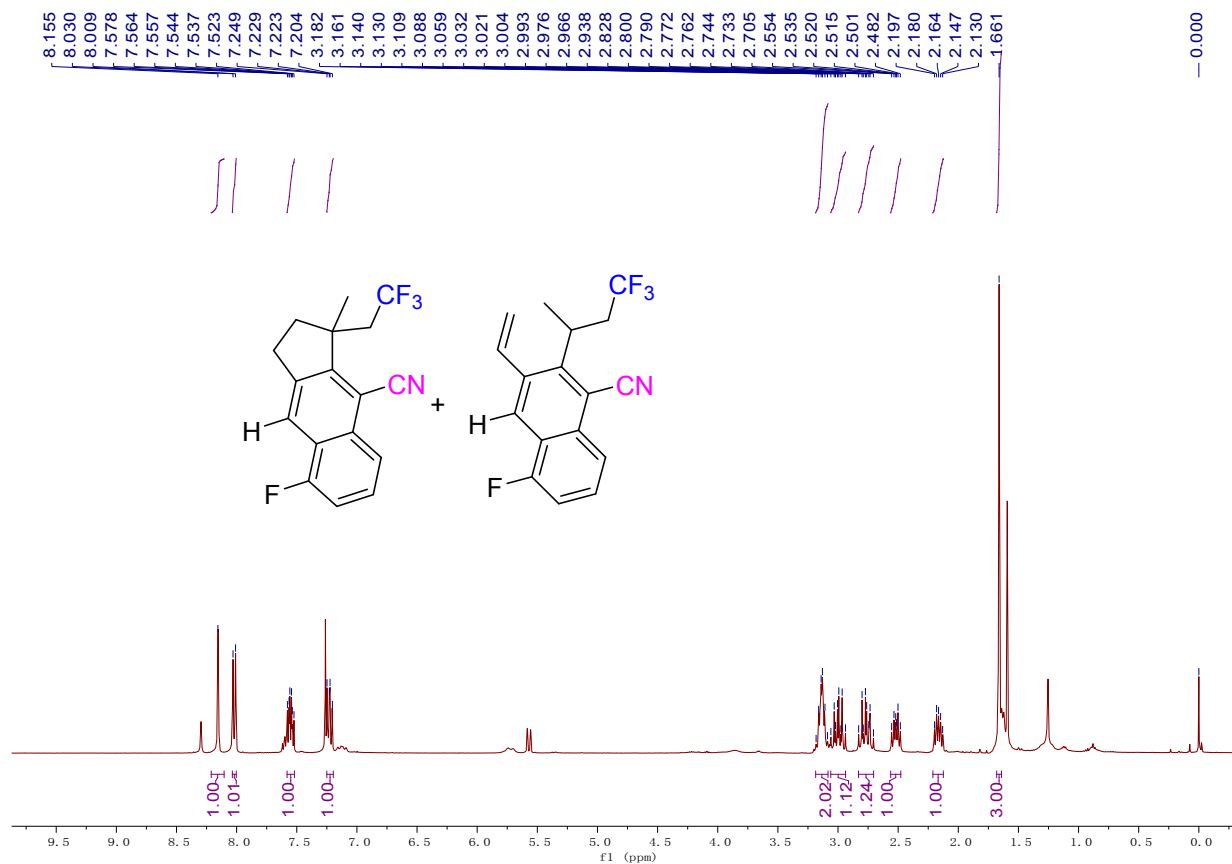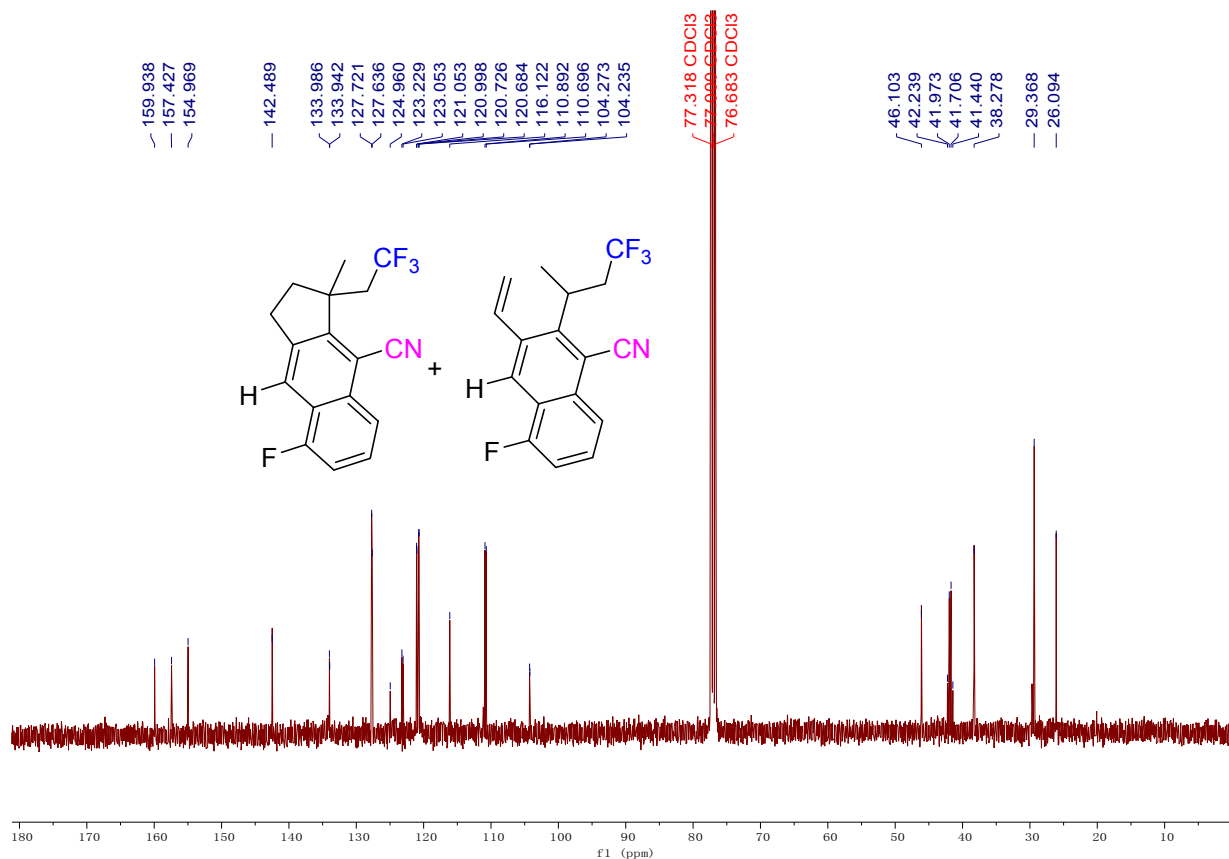



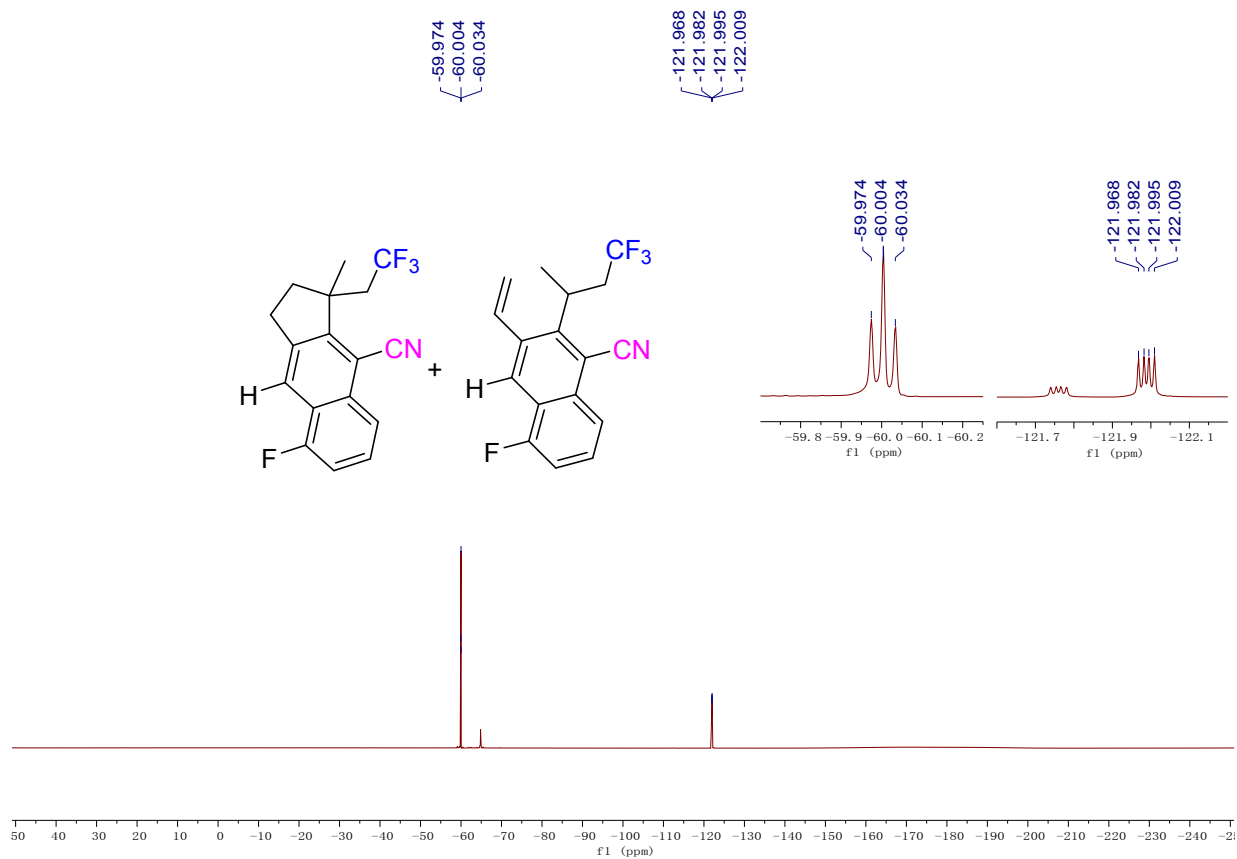

**5-chloro-3-methyl-3-(2,2,2-trifluoroethyl)-2,3-dihydro-1H-cyclopenta[*b*]naphthalene-4-carbonitrile (2n)**

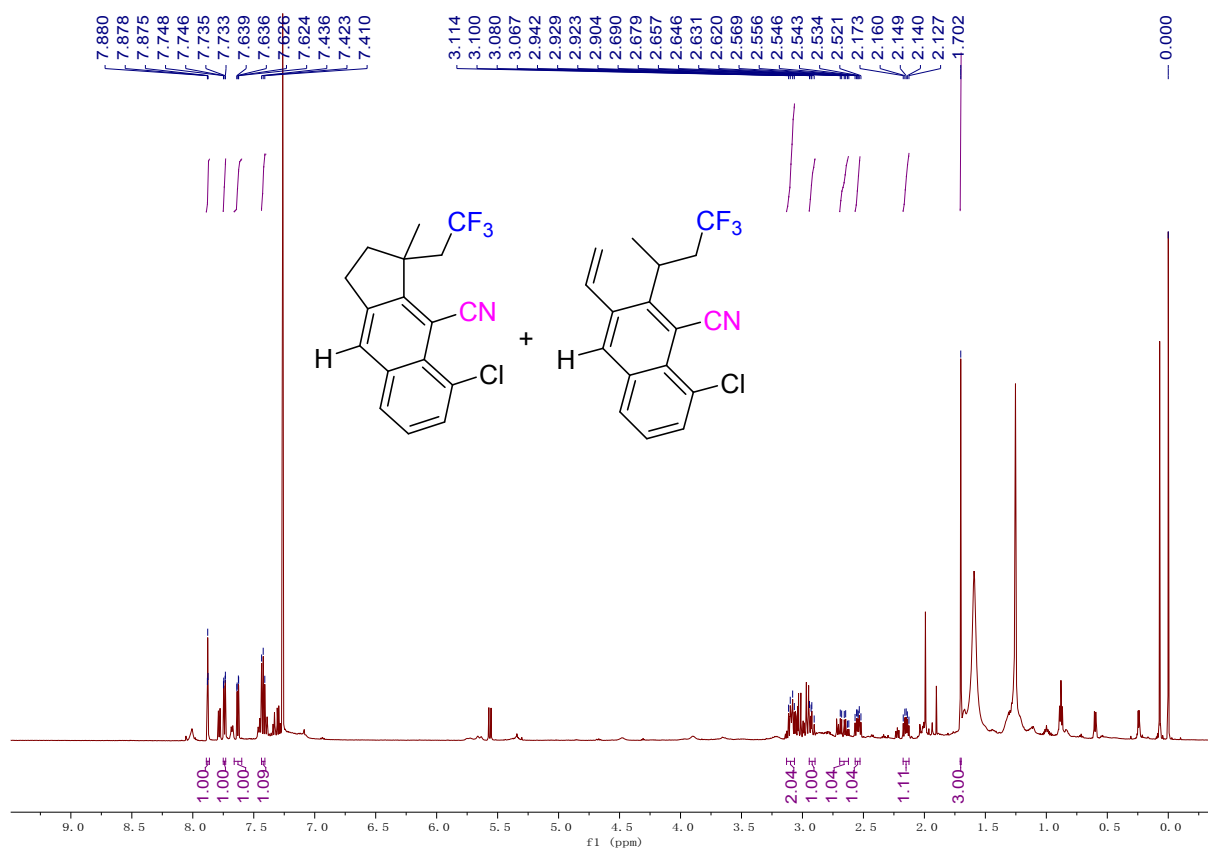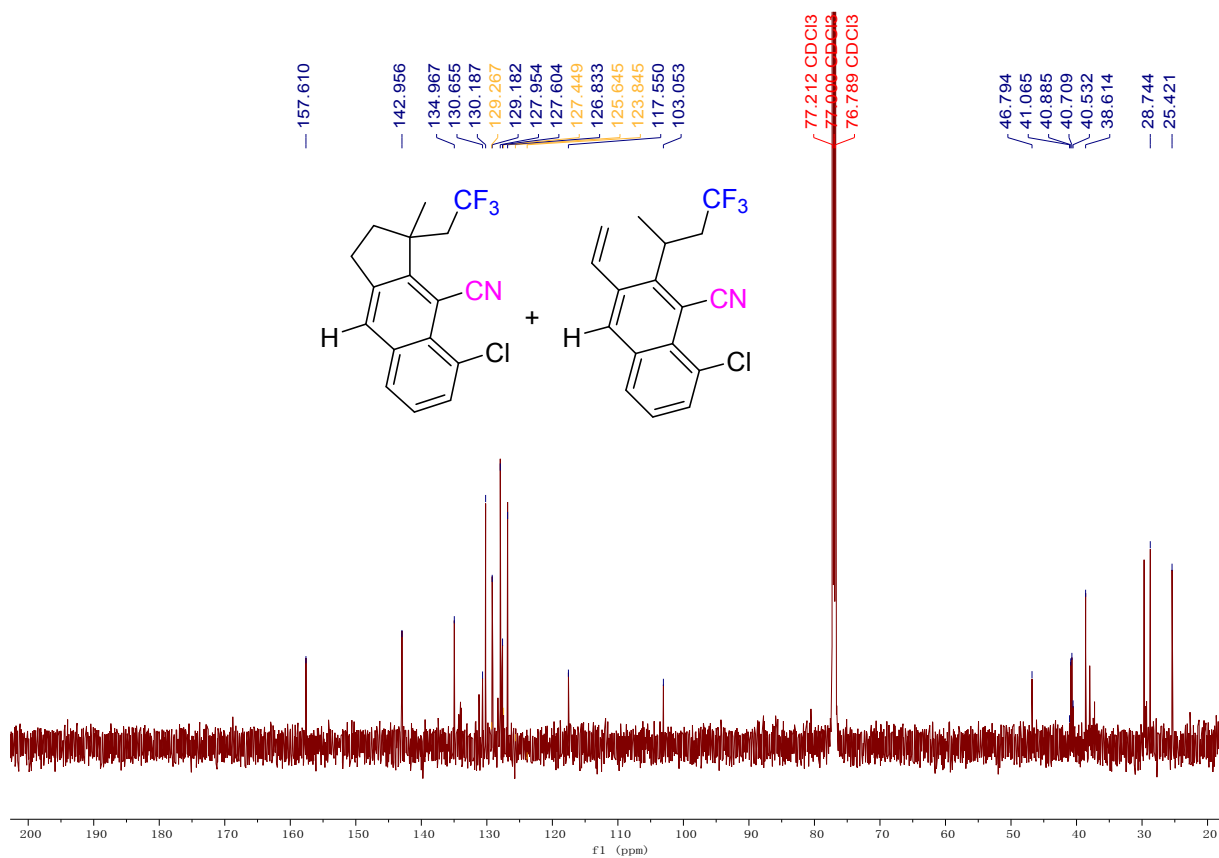

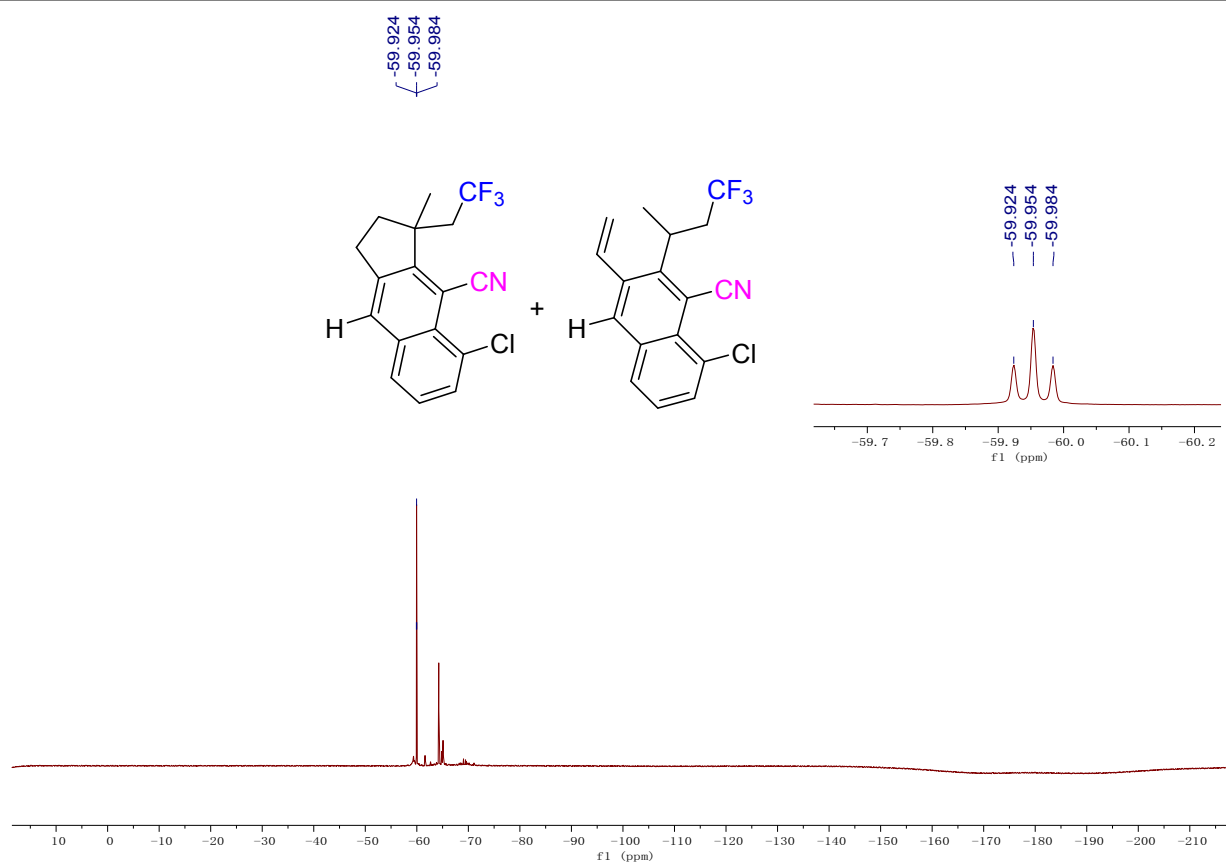

**3-methyl-3-(2,2,2-trifluoroethyl)-7-(trifluoromethyl)-2,3-dihydro-1H-cyclopenta[*b*]naphthalene-4-carbonitrile (2o)**

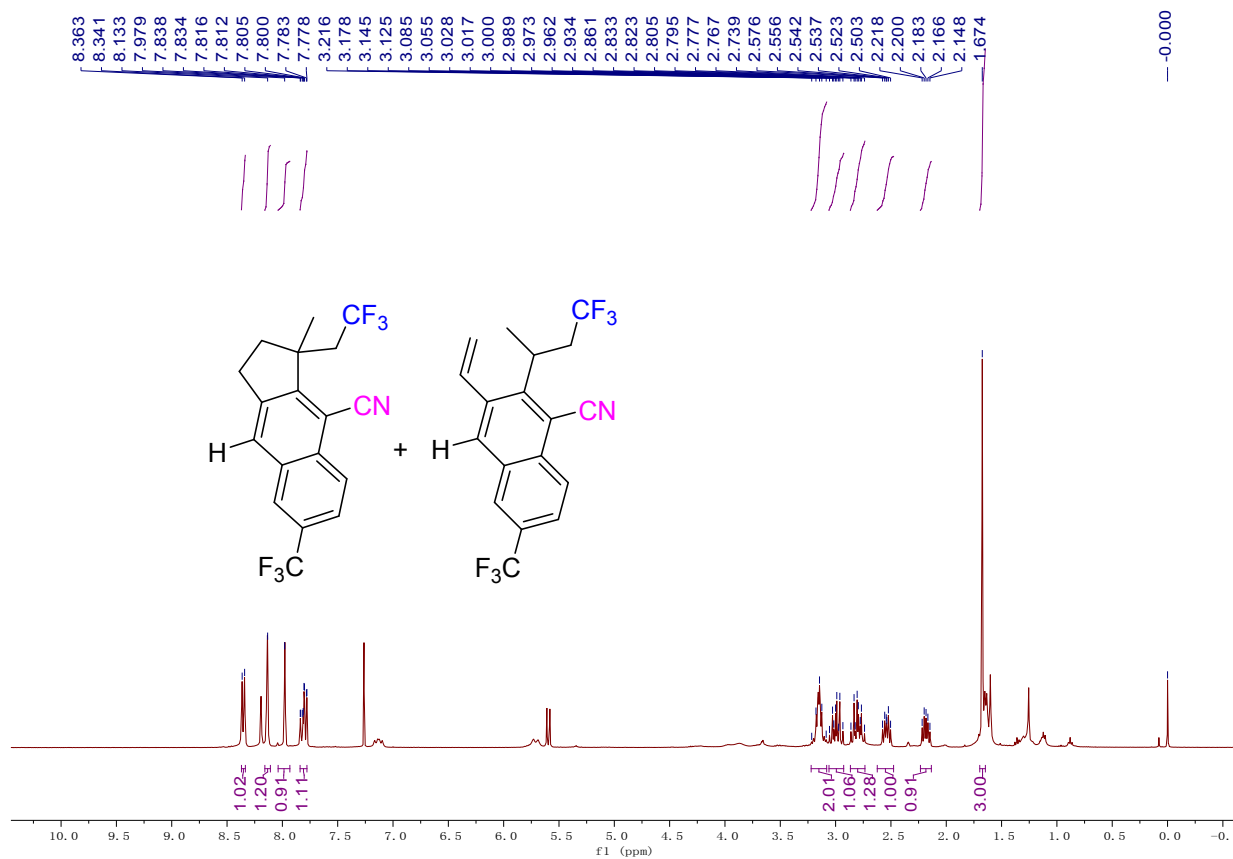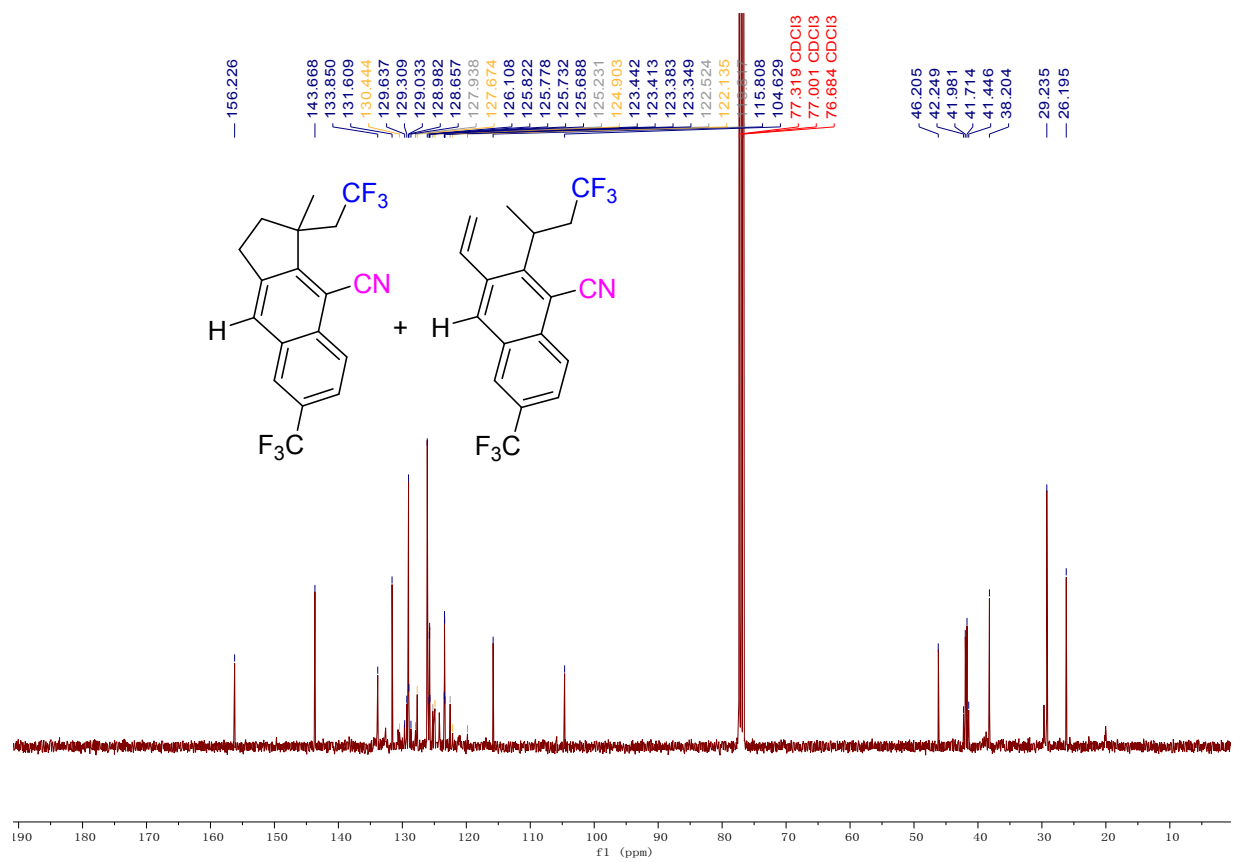

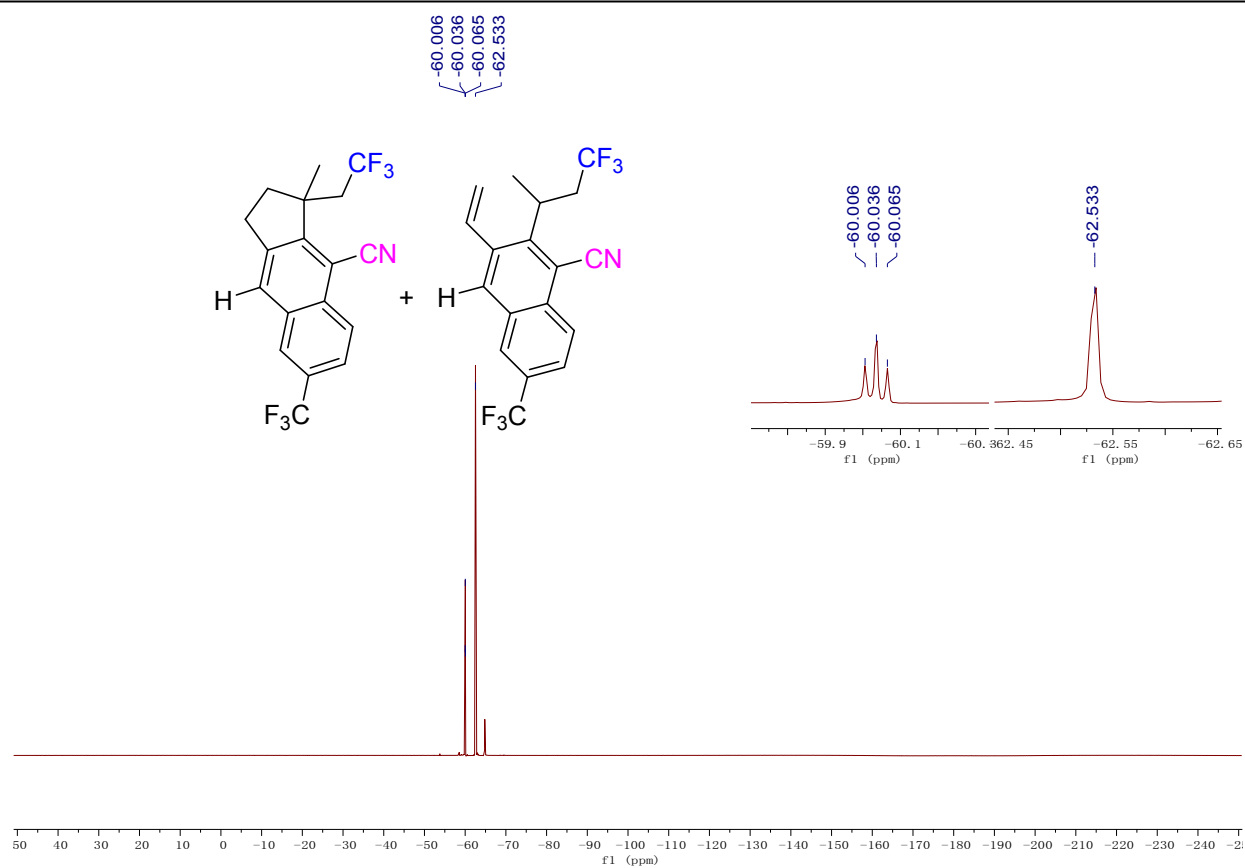

**7-fluoro-3-methyl-3-(2,2,2-trifluoroethyl)-2,3-dihydro-1H-cyclopenta[b]naphthalene-4-carbonitrile (2p)**



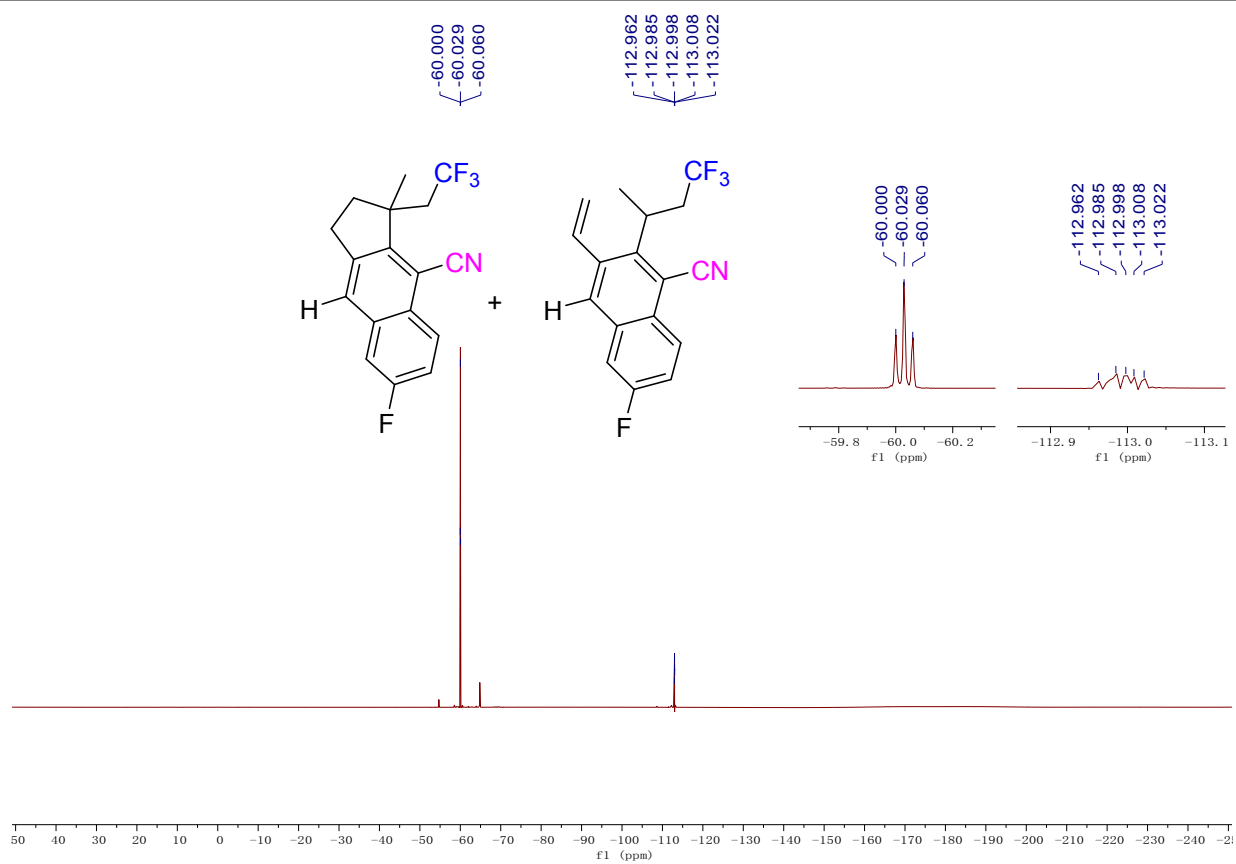

**3,6-dimethyl-3-(2,2,2-trifluoroethyl)-2,3-dihydro-1H-cyclopenta[*b*]naphthalene-4-carbonitrile (2q)**

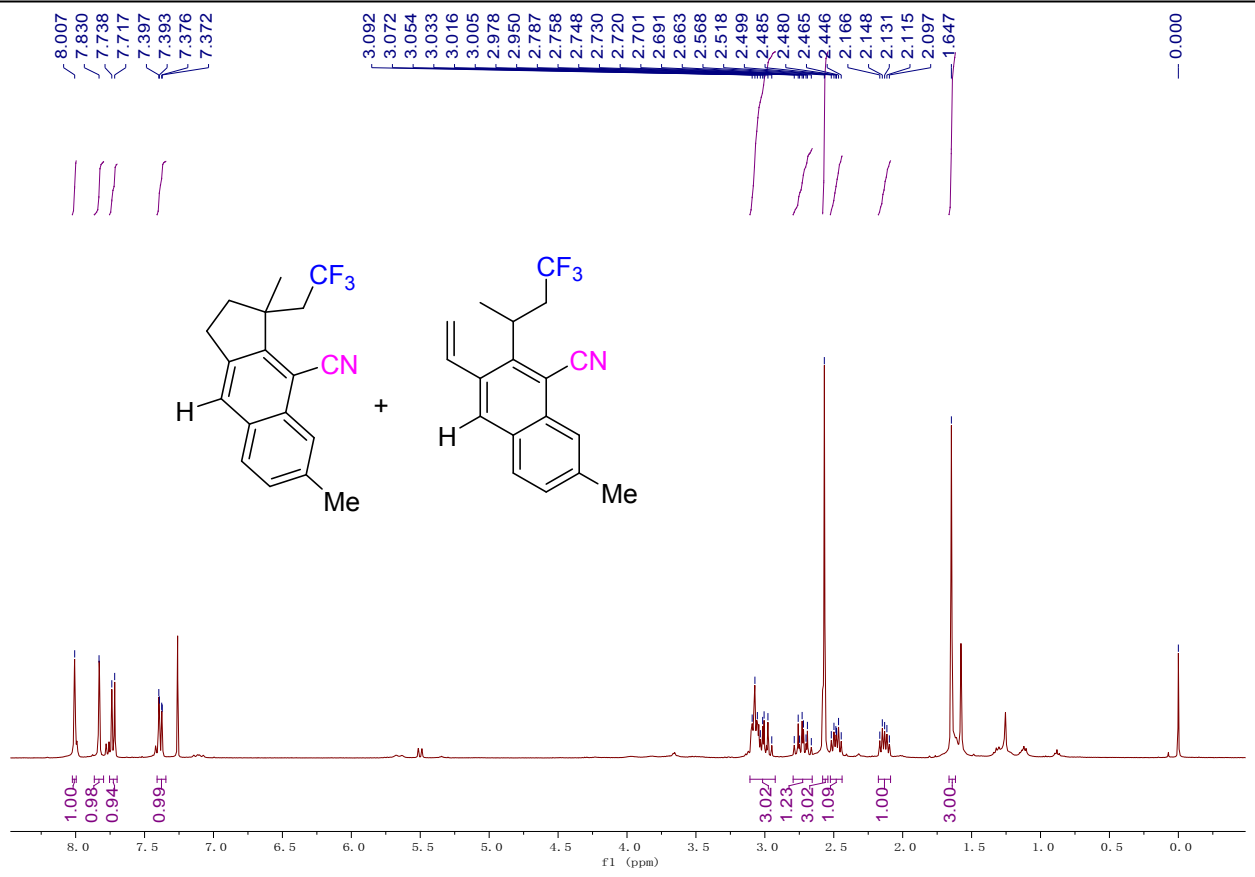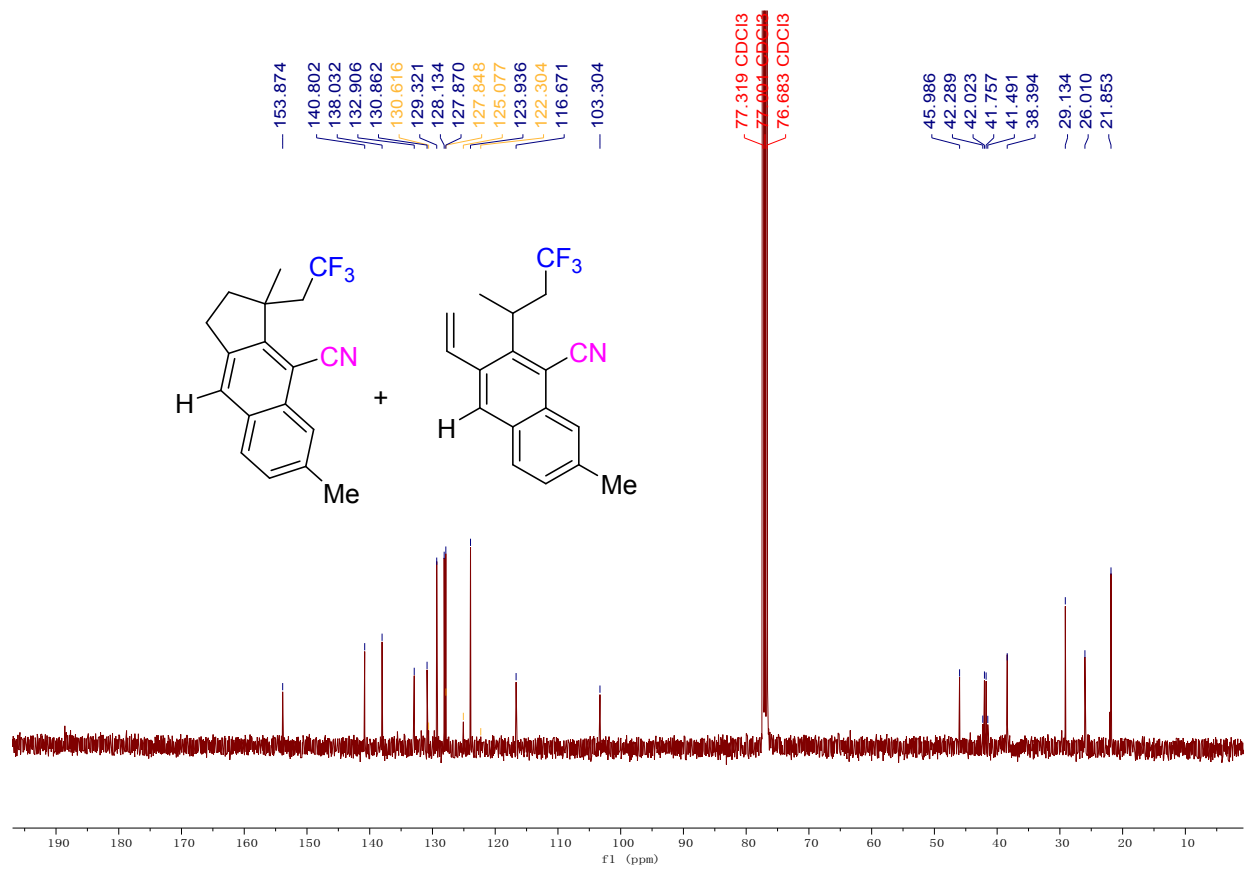



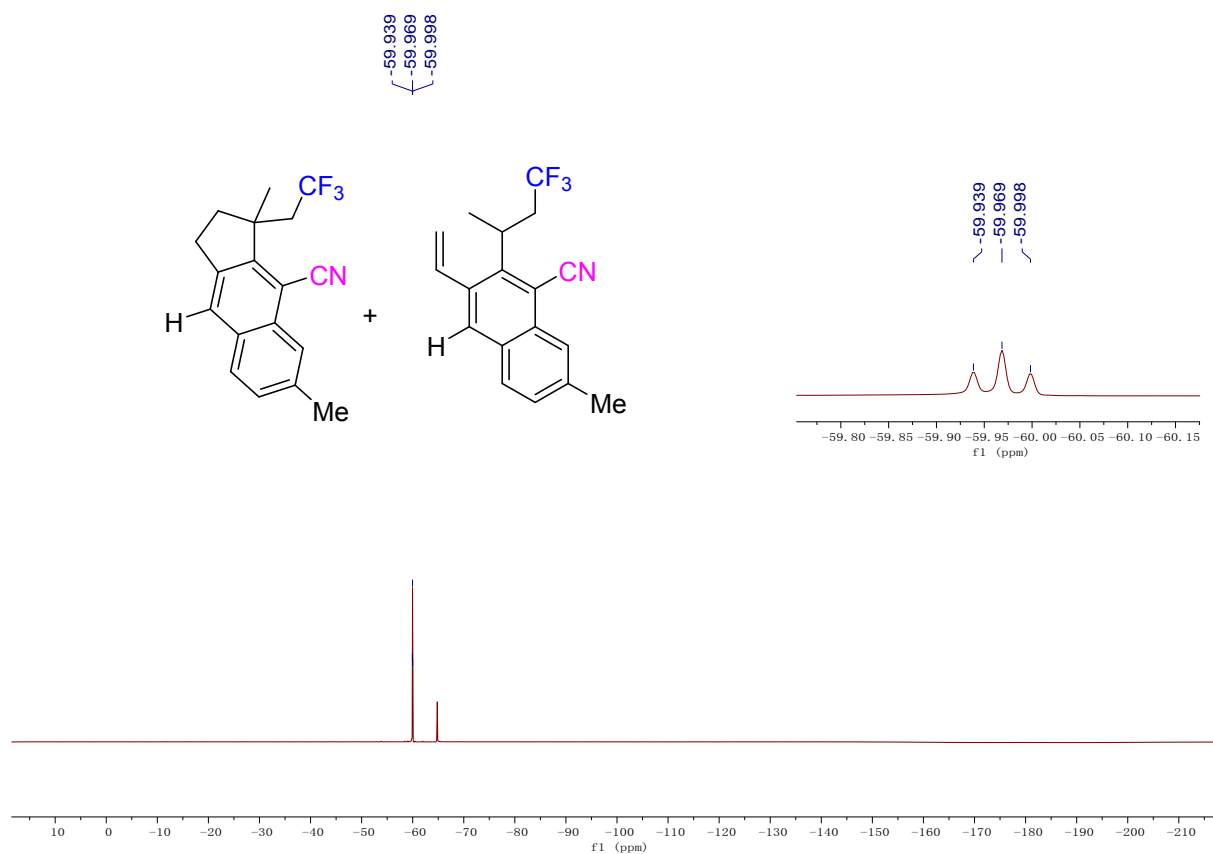

**7-chloro-3-methyl-3-(2,2,2-trifluoroethyl)-2,3-dihydro-1H-cyclopenta[b]naphthalene-4-carbonitrile (2r)**

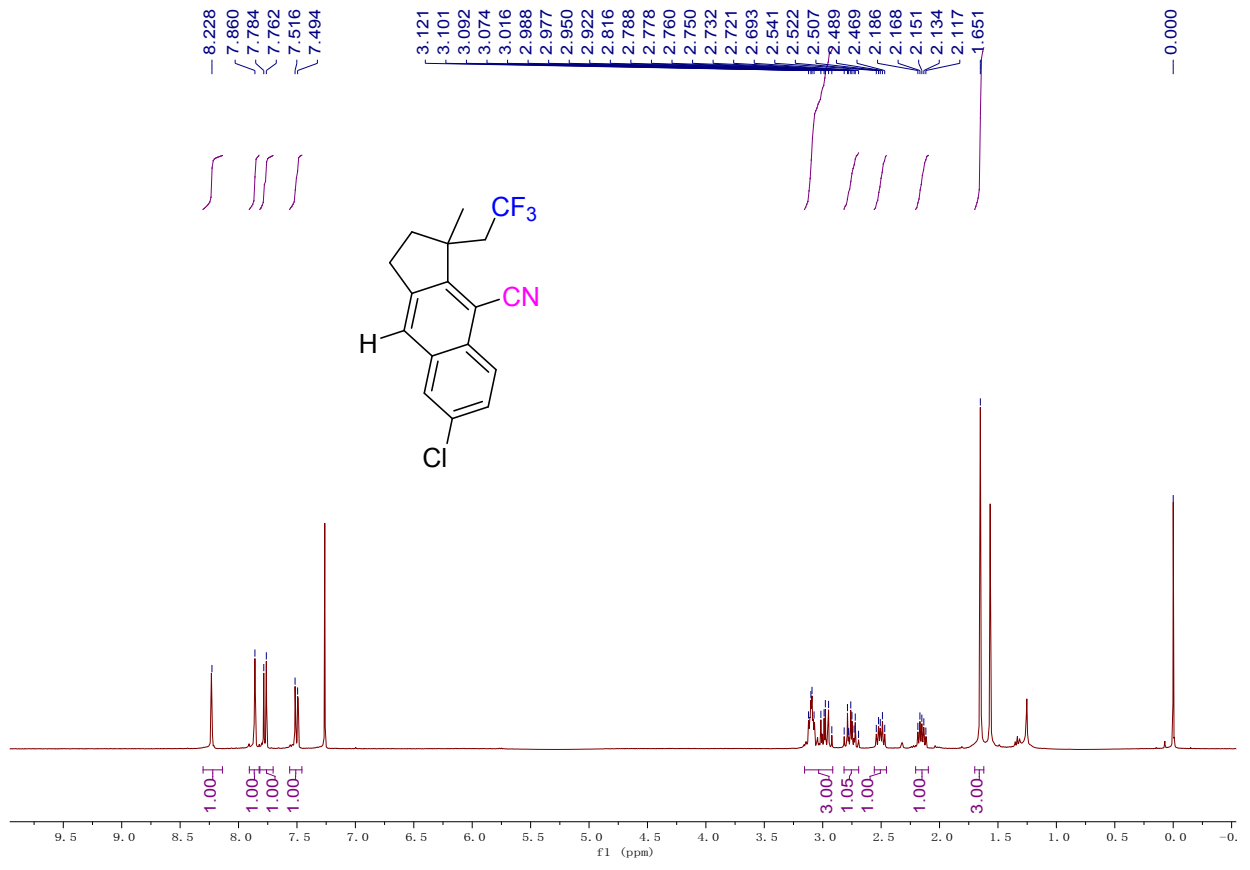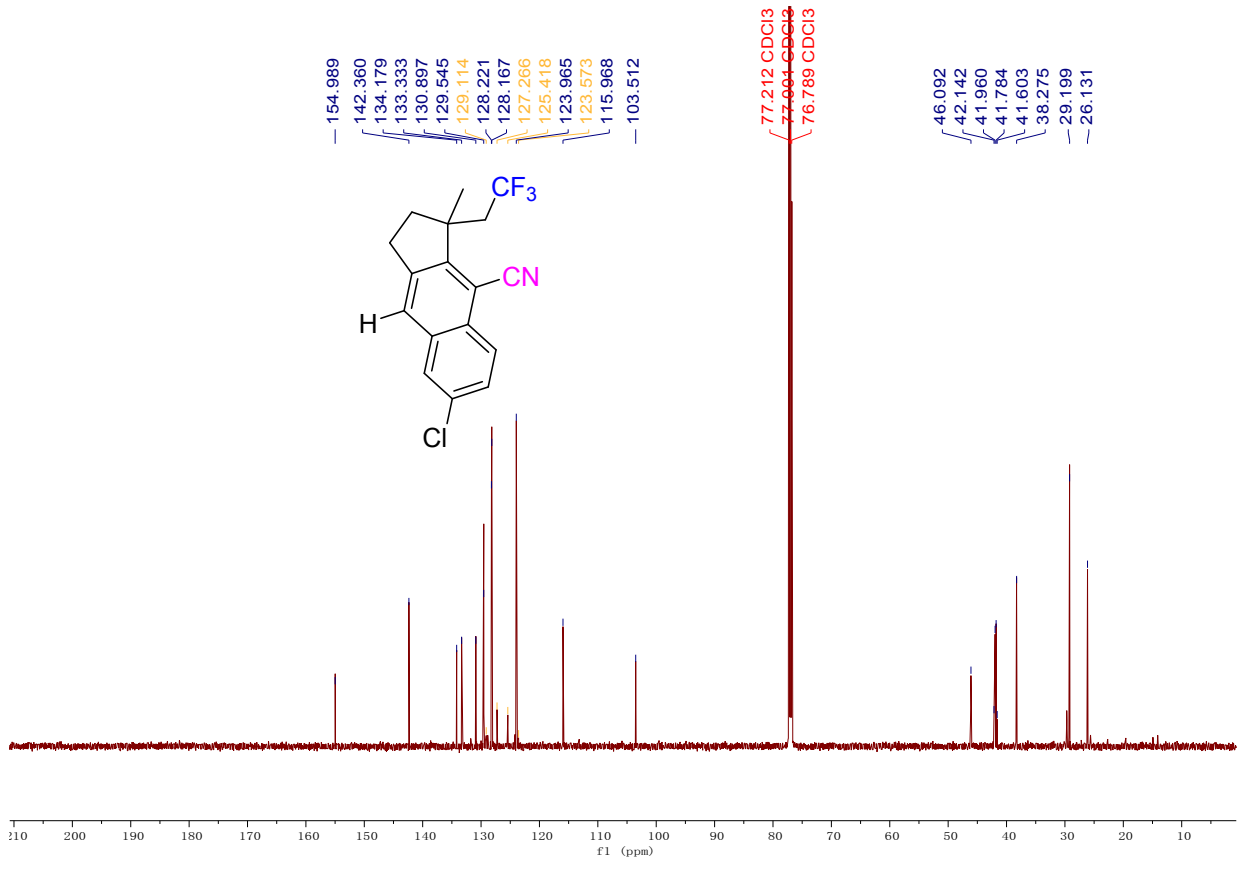

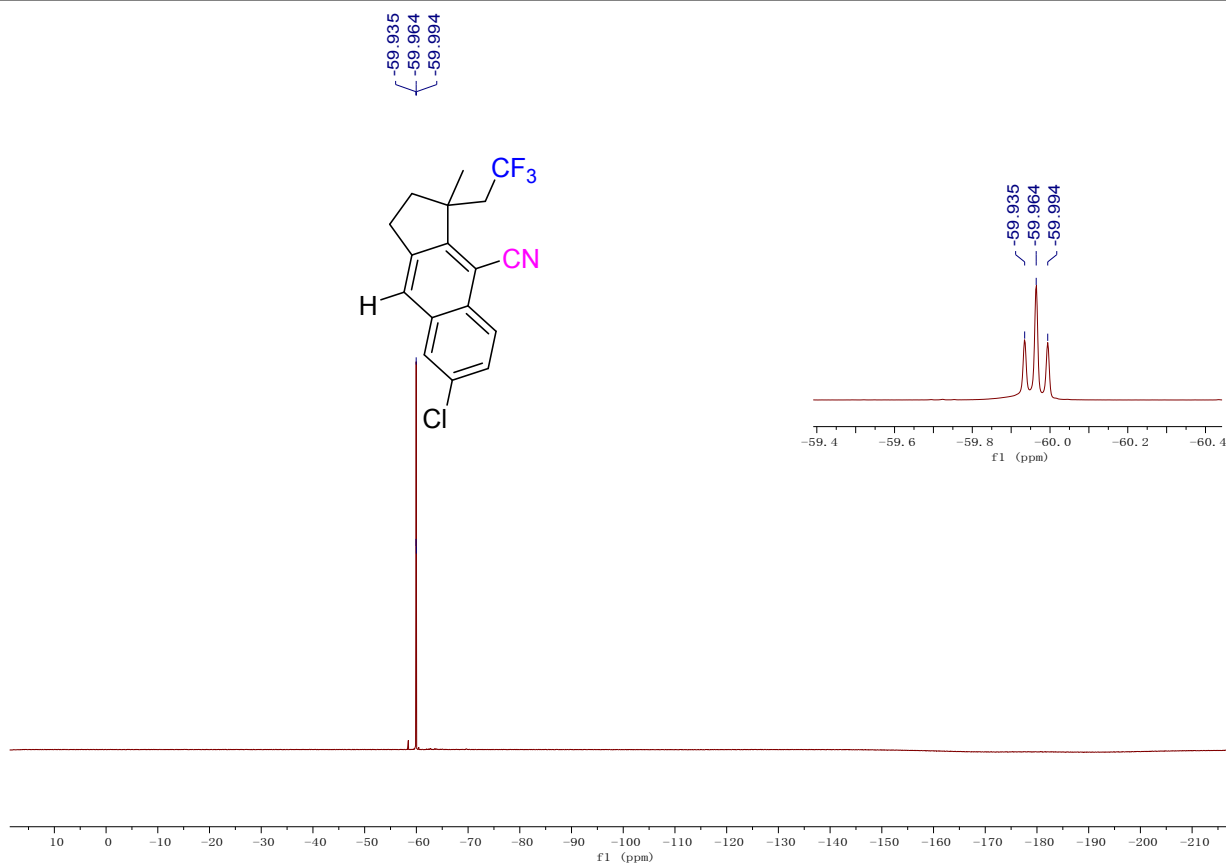

**6-chloro-3-methyl-3-(2,2,2-trifluoroethyl)-2,3-dihydro-1H-cyclopenta[b]naphthalene-4-carbonitrile (2s)**

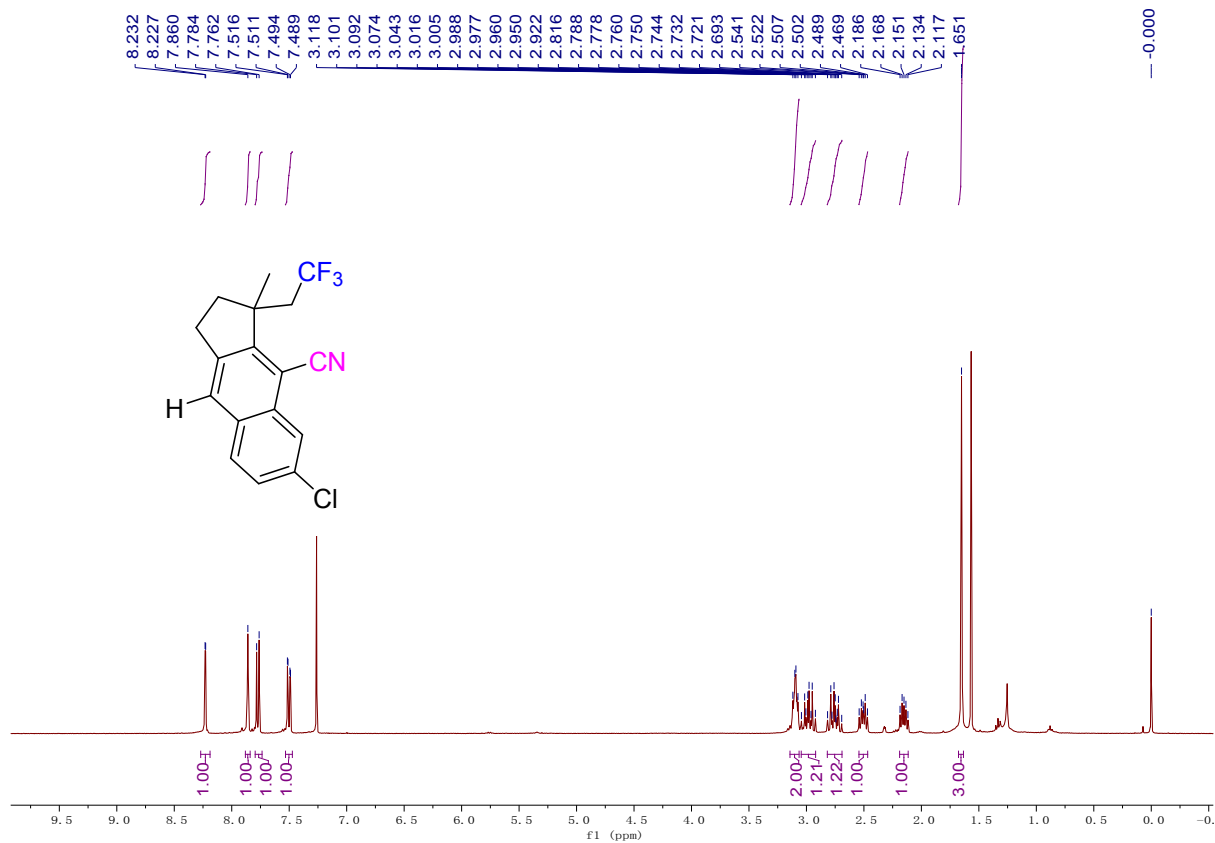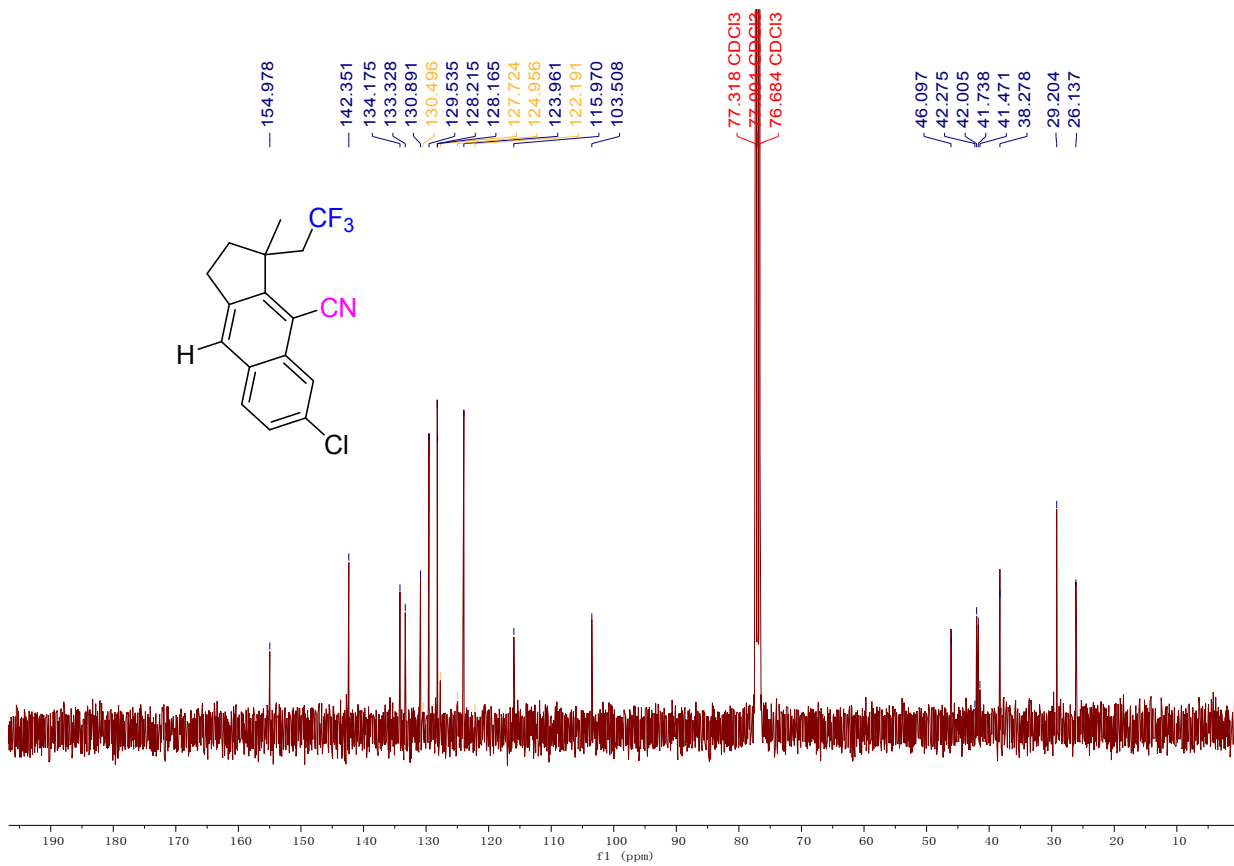

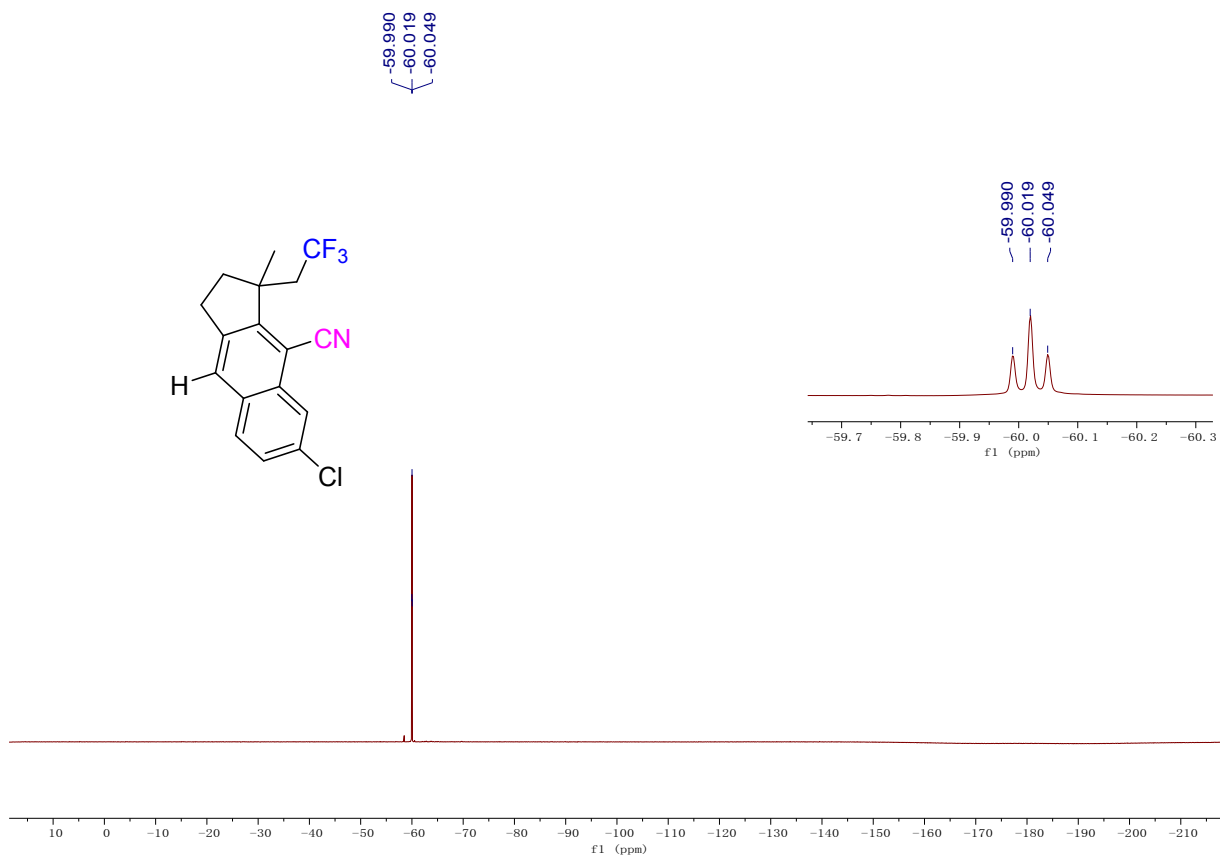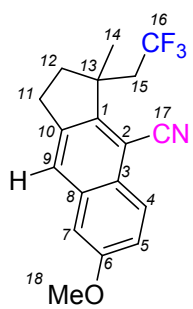

**7-methoxy-3-methyl-3-(2,2,2-trifluoroethyl)-2,3-dihydro-1H-cyclopenta[b]naphthalene-4-carbonitrile (2t)**

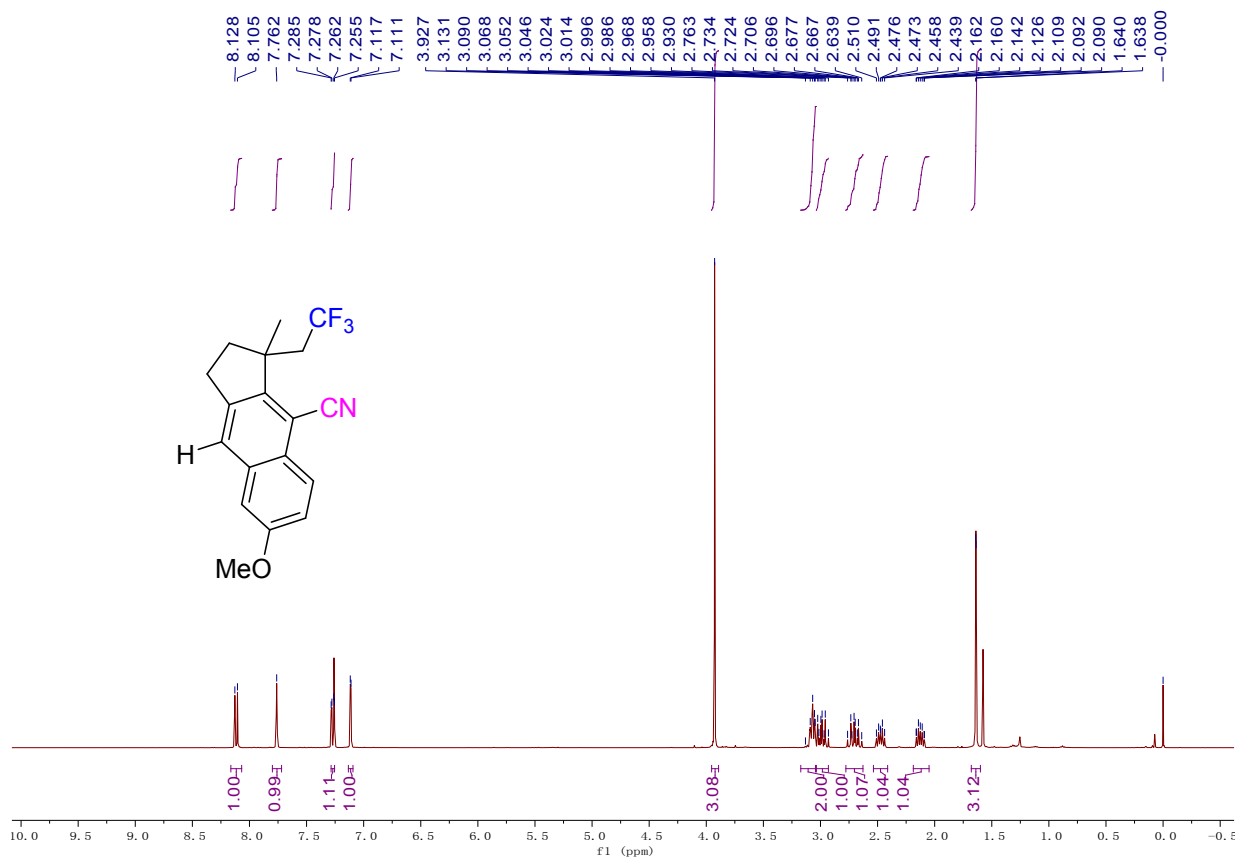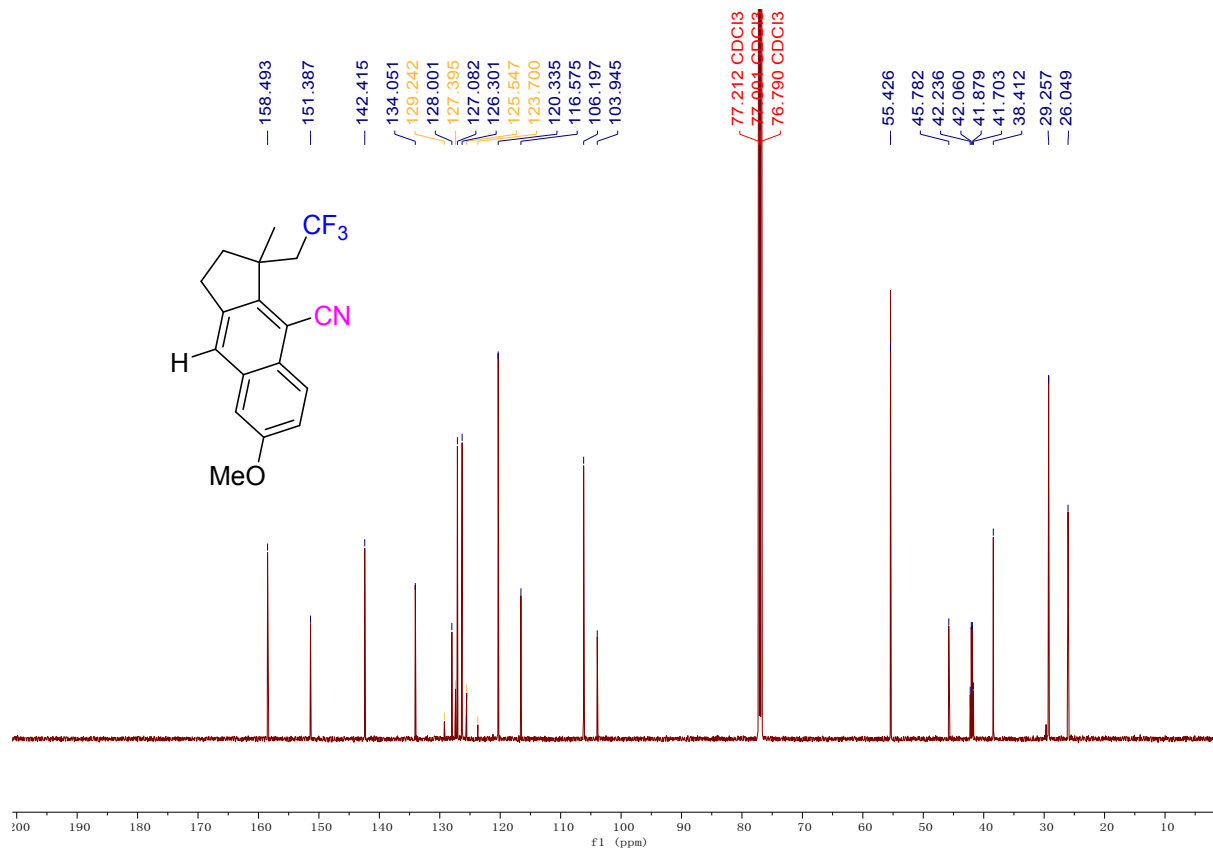

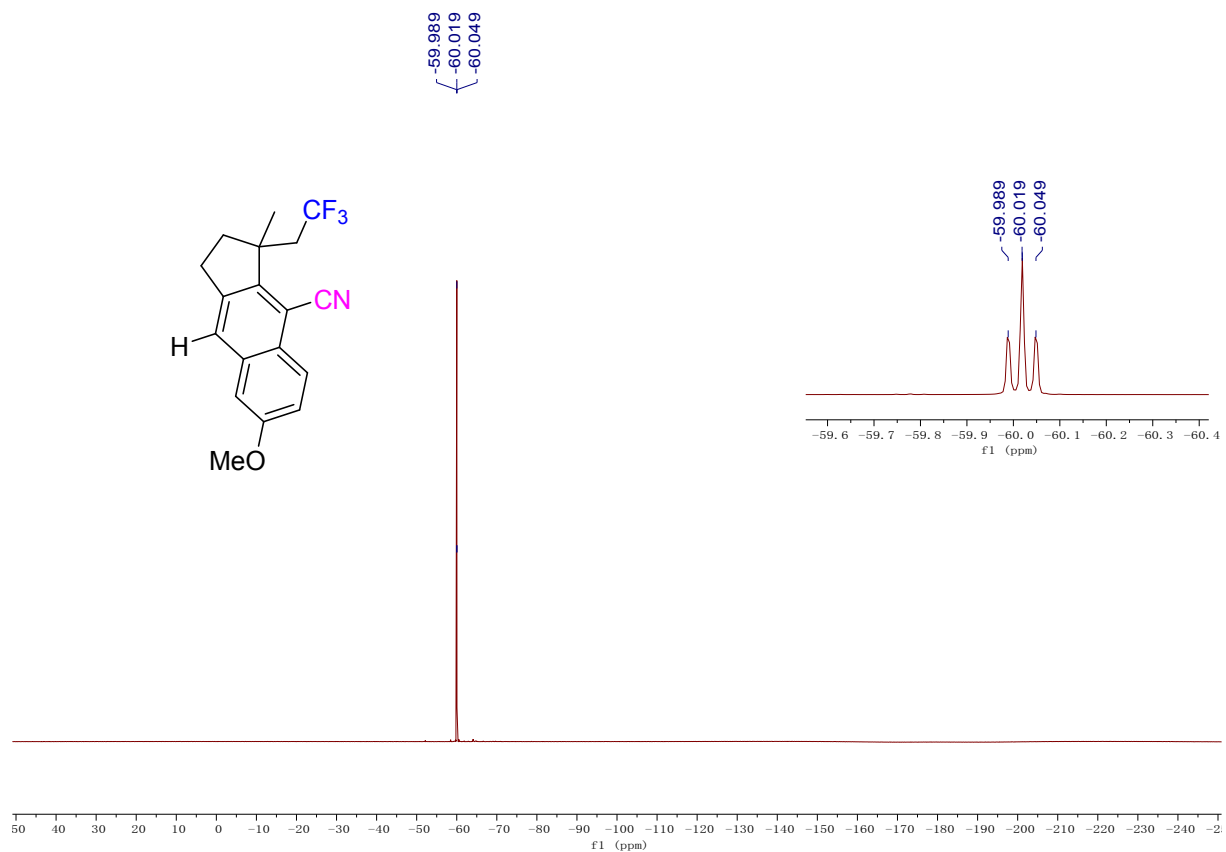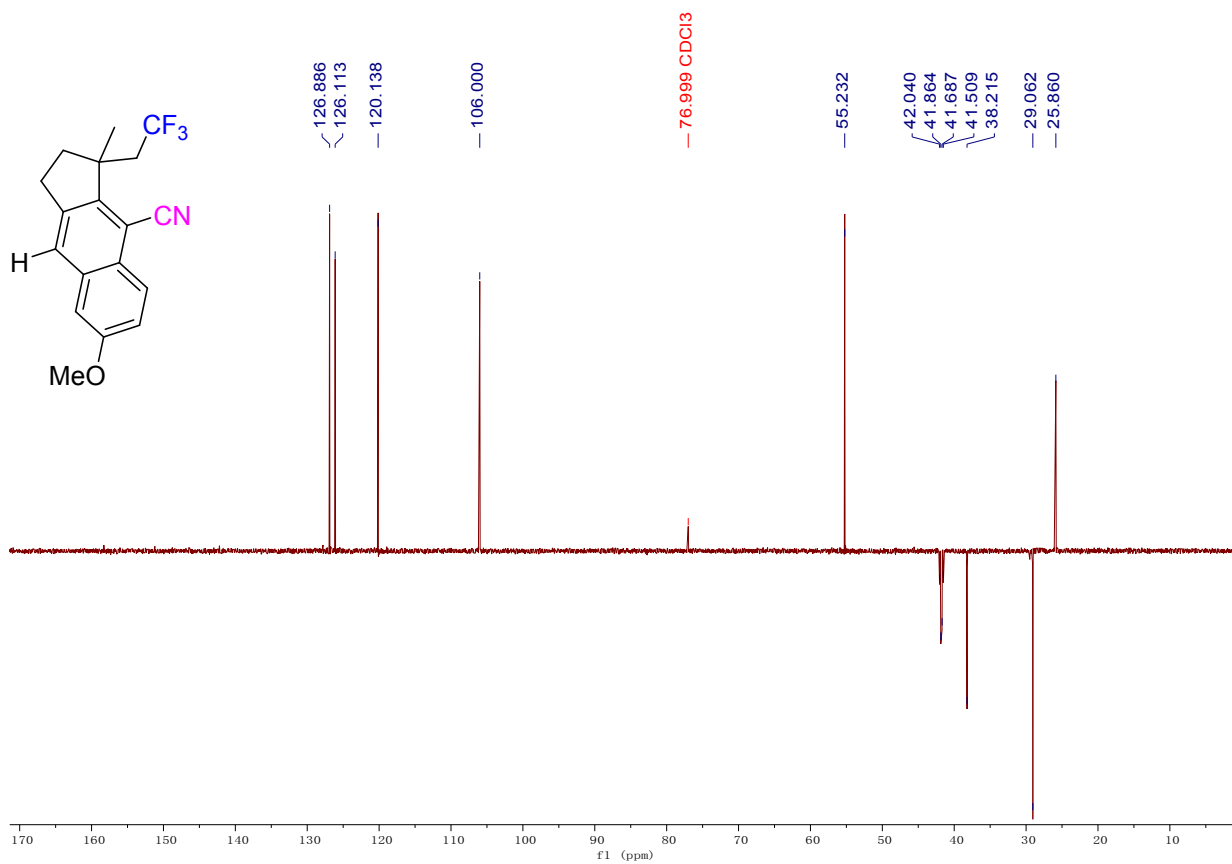

**Distortionless Enhancement by Polarization Transfer 135 (DEPT 135)**

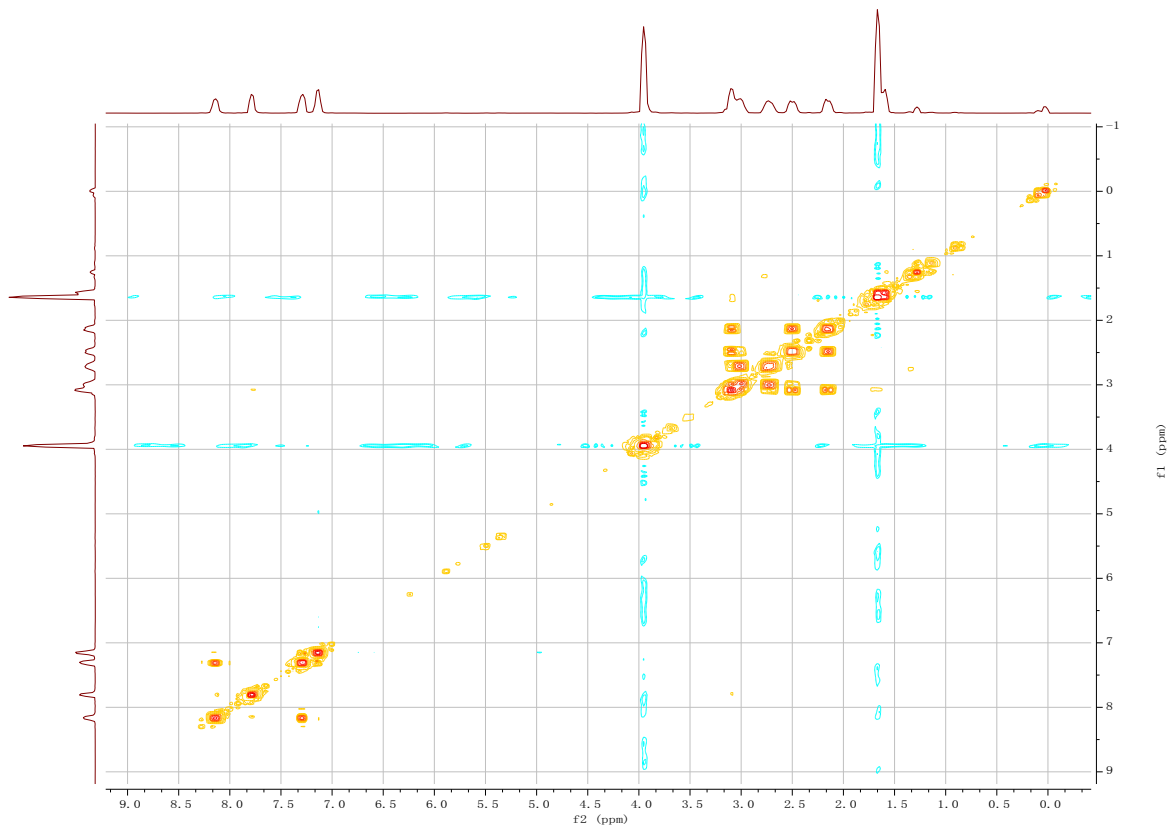

**H-H Correlation Spectroscopy (COSY)**

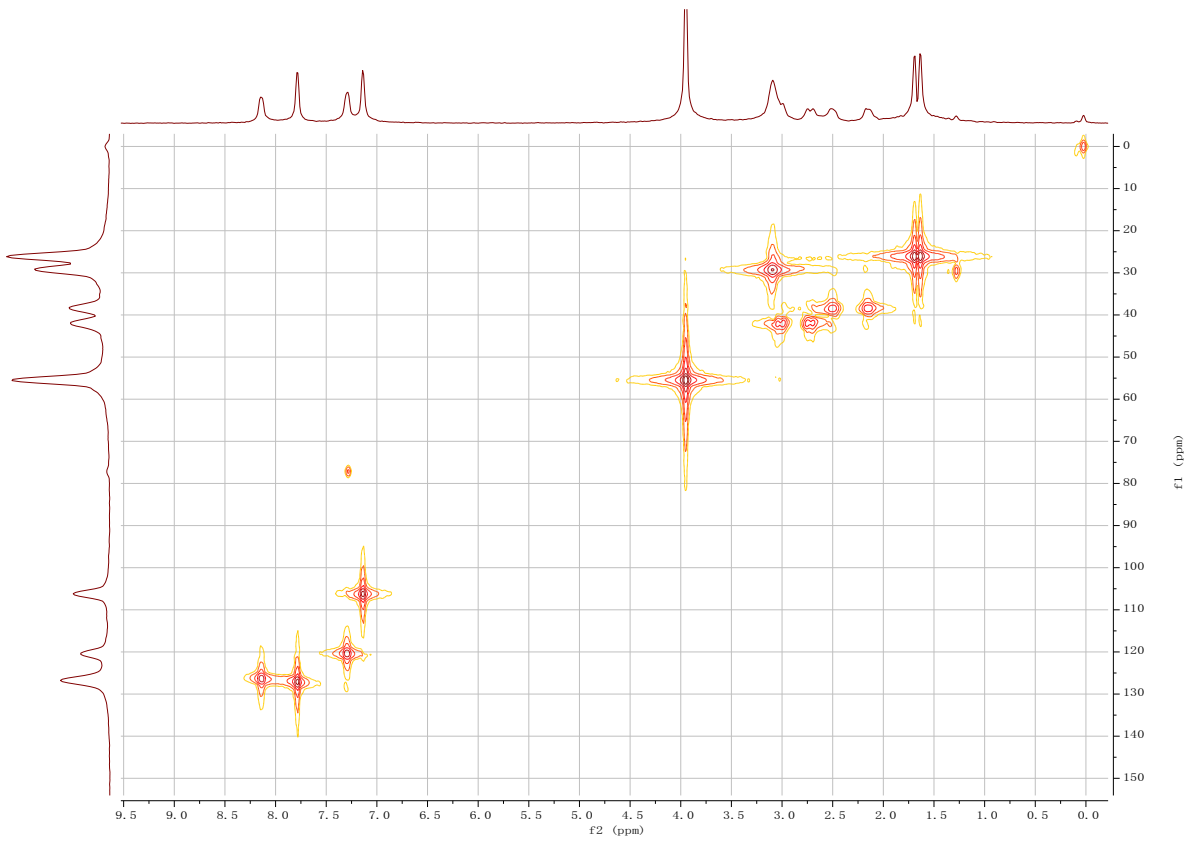

**Heteronuclear Multiple-Quantum Correlation (HMQC)**



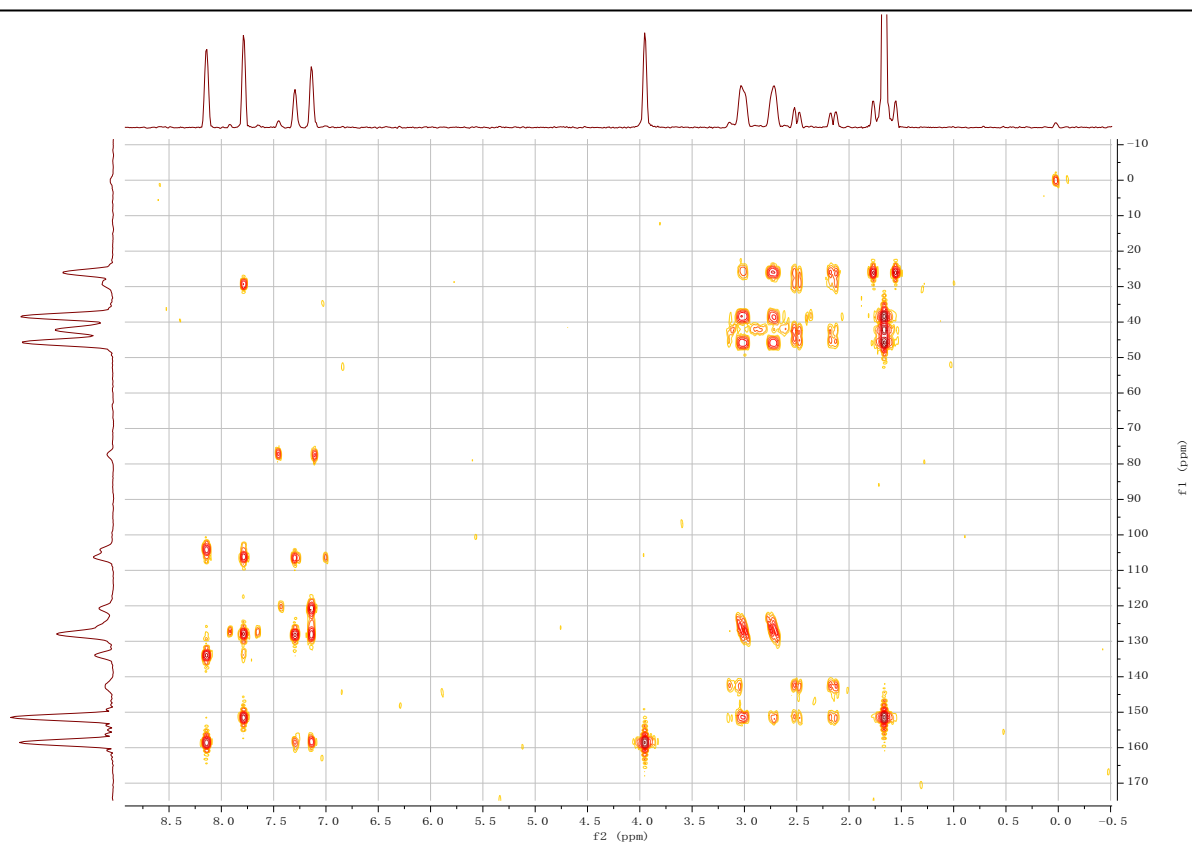

**Heteronuclear Multiple Bond Correlation (HMBC)**

**9-methyl-9-(2,2,2-trifluoroethyl)-8,9-dihydro-7*H*-cyclopenta[6,7]naphtho[1,2-*d*][1,3]dioxole-10-carbonitrile (2u)**

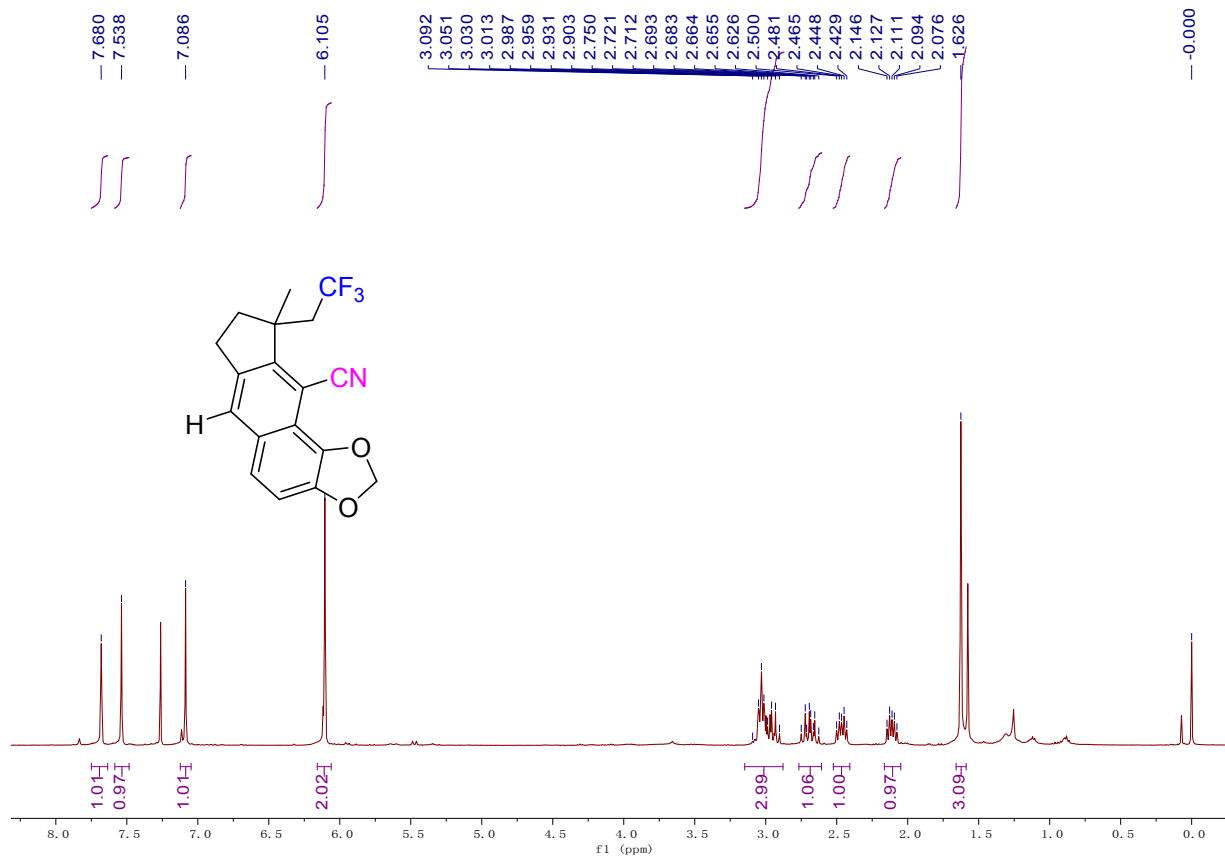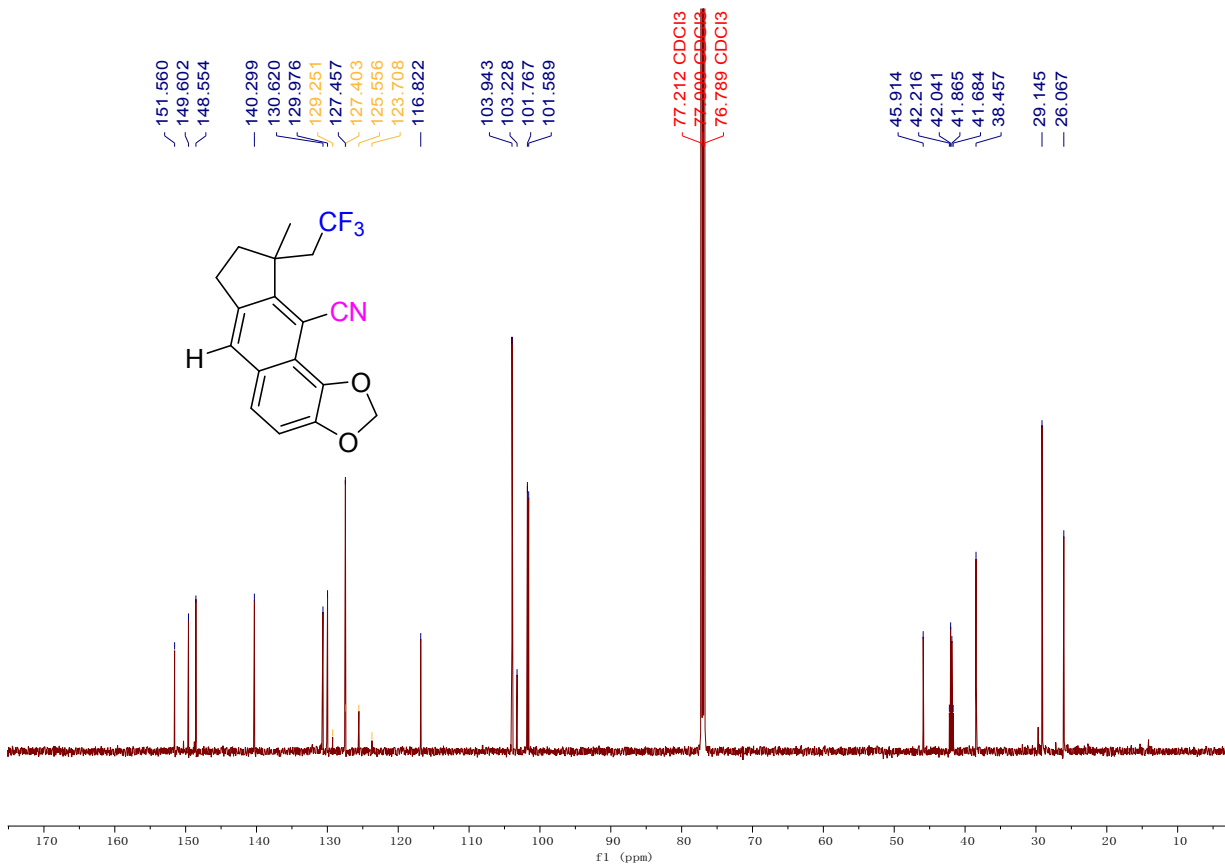

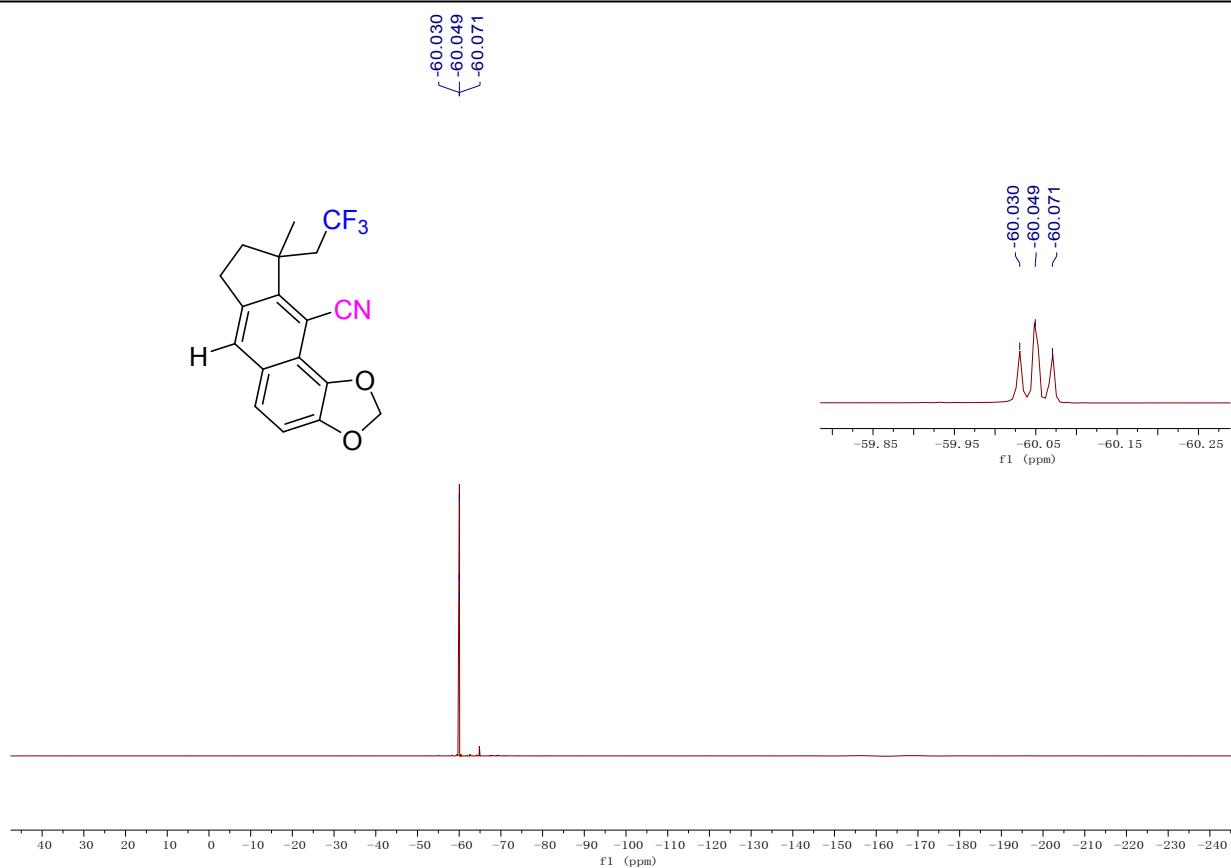

**2-(trifluoromethyl)-2',3'-dihydrospiro[cyclohexane-1,1'-cyclopenta[*b*]naphthalene]-9'-carbonitrile (2v)**

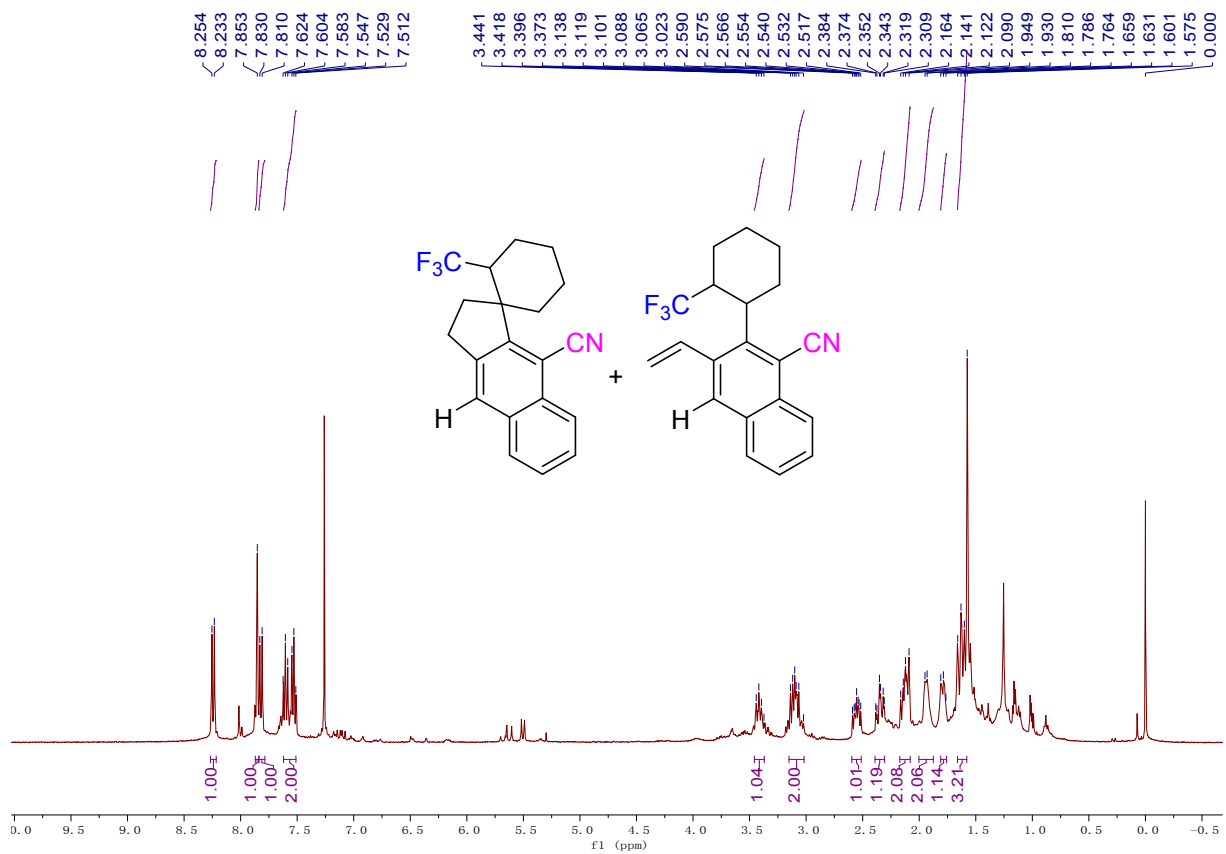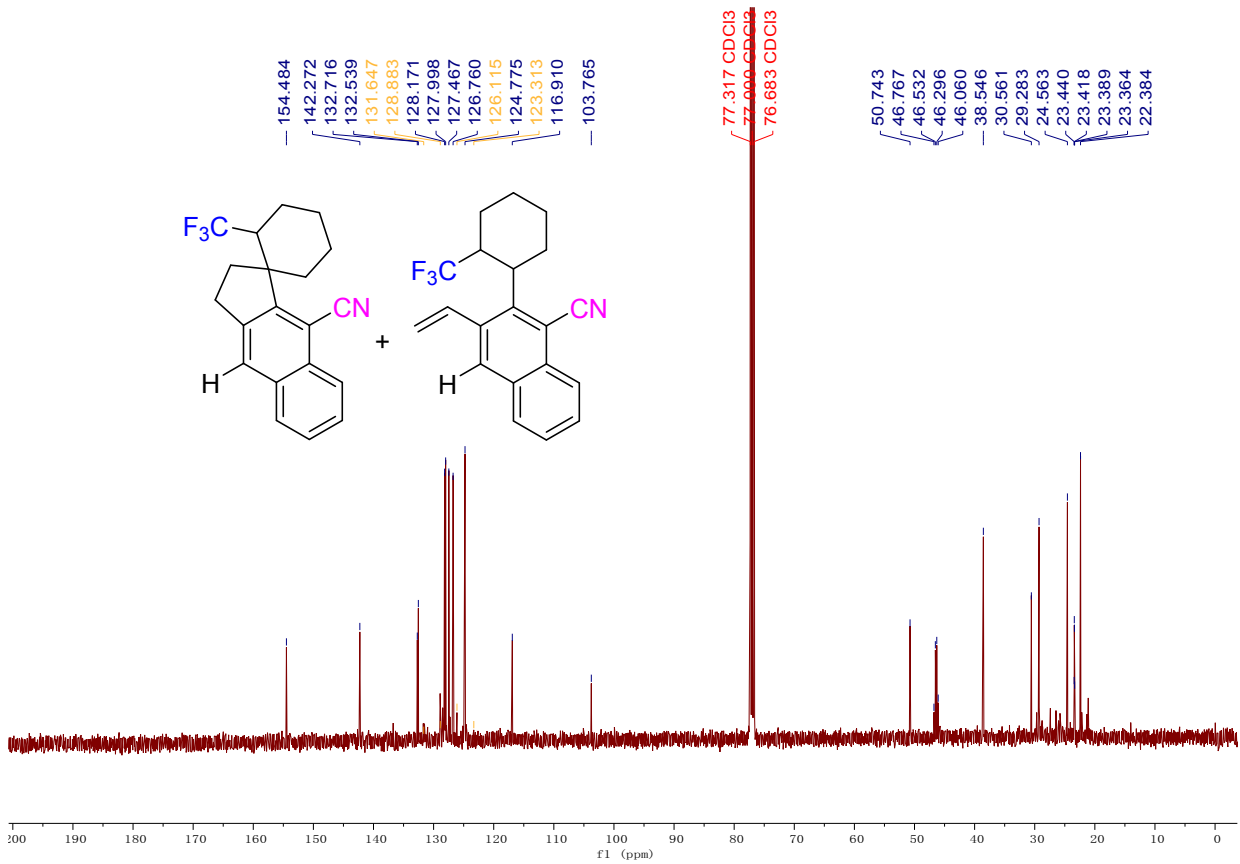

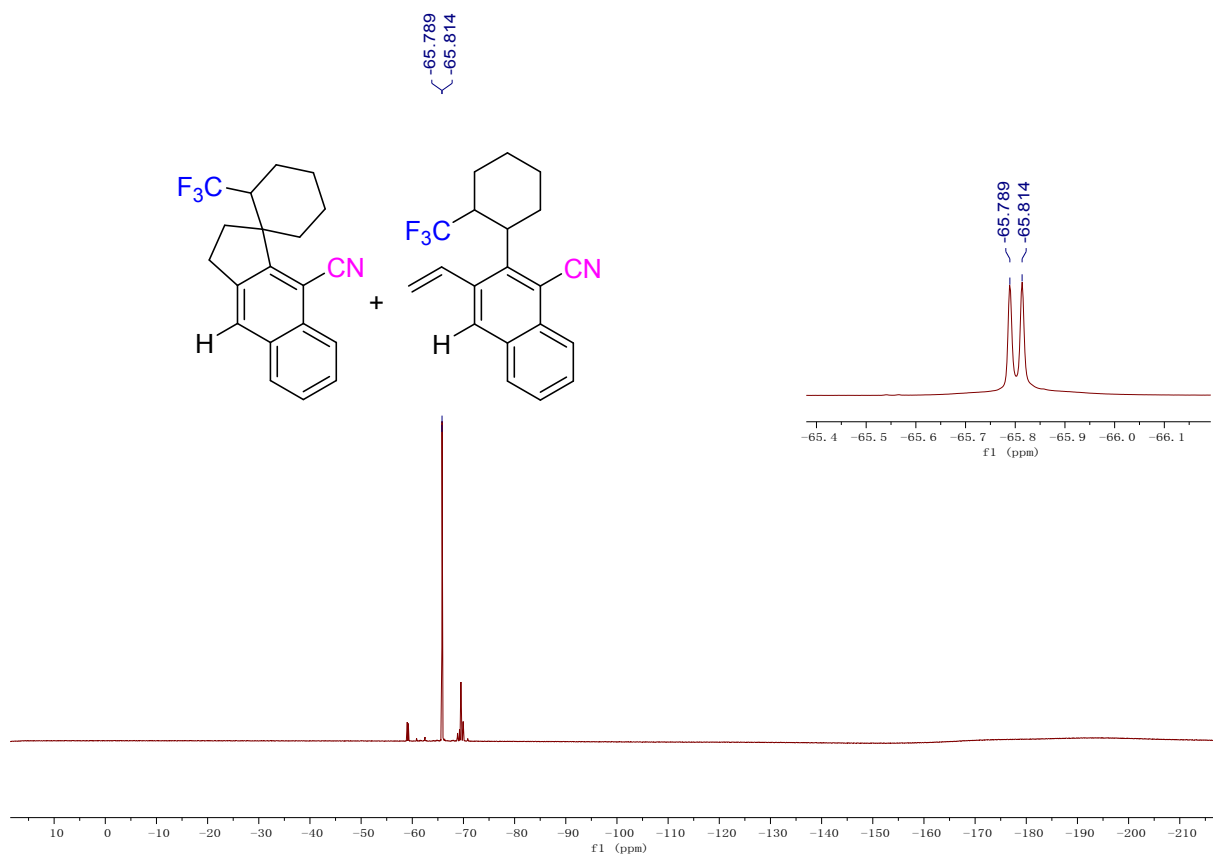

### 3 X-ray crystal data of compounds 2c and 3b

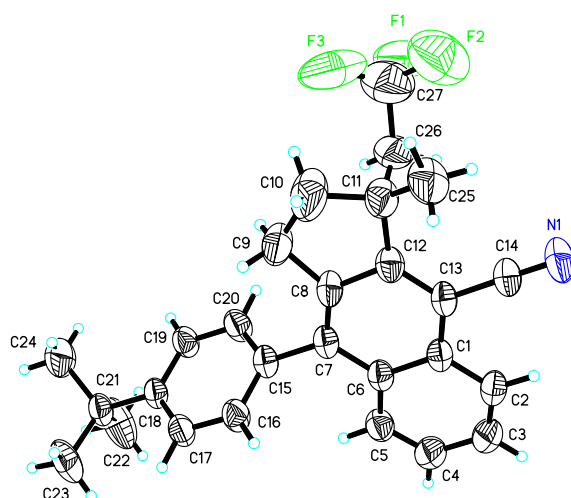

The crystal data of **2c** have been deposited in CCDC with number 2017000. Empirical Formula:  $C_{27}H_{26}F_3N$ ; Formula Weight: 421.49; Crystal Color, Habit: colorless, Crystal Dimensions: 0.190 x 0.140 x 0.080 mm<sup>3</sup>; Crystal System: Triclinic; Lattice Parameters:  $a = 8.7540(3)\text{\AA}$ ,  $b = 13.9202(5)\text{\AA}$ ,  $c = 20.4884(7)\text{\AA}$ ,  $\alpha = 70.8050(10)^\circ$ ,  $\beta = 84.4830(10)^\circ$ ,  $\gamma = 81.5860(10)^\circ$ ,  $V = 2329.40(14)\text{\AA}^3$ ; Space group:  $P -1$ ;  $Z = 4$ ;  $D_{calc} = 1.202\text{ g/cm}^3$ ;  $F_{000} = 888$ ; Final R indices [ $I > 2\sigma(I)$ ]  $R1 = 0.1232$ ,  $wR2 = 0.3304$ .

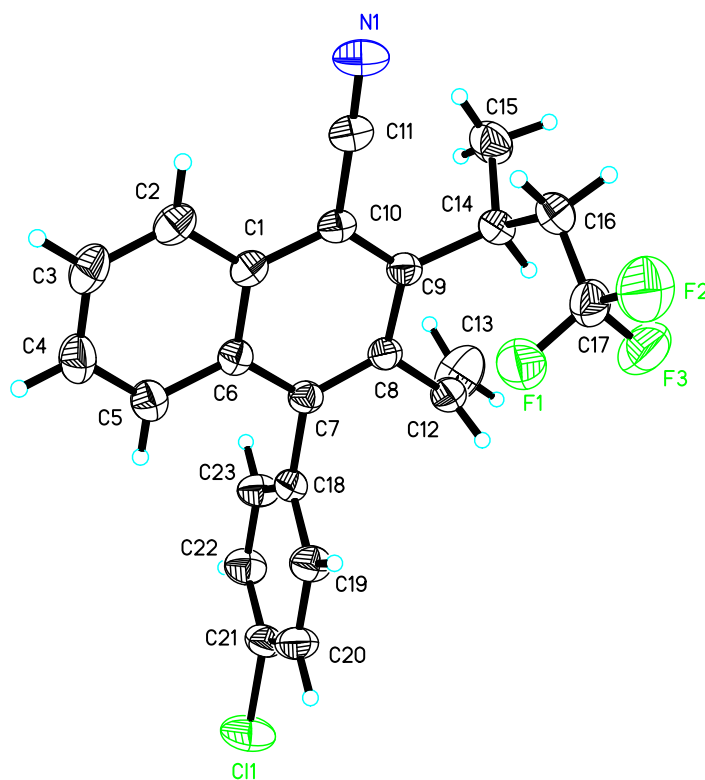

The crystal data of **3b** have been deposited in CCDC with number 1967399. Empirical Formula:  $C_{23}H_{17}ClF_3N$ ; Formula Weight: 399.83; Crystal Color, Habit: colorless, Crystal Dimensions: 0.200 x 0.160 x 0.130 mm<sup>3</sup>; Crystal System: Triclinic; Lattice Parameters:  $a = 8.6636(9)\text{\AA}$ ,  $b = 8.9777(11)\text{\AA}$ ,  $c = 13.8142(16)\text{\AA}$ ,  $\alpha = 83.784(4)^\circ$ ,  $\beta = 78.625(3)^\circ$ ,  $\gamma = 68.828(3)^\circ$ ,  $V = 981.4(2)\text{\AA}^3$ ; Space group: P -1;  $Z = 2$ ;  $D_{calc} = 1.353\text{ g/cm}^3$ ;  $F_{000} = 412$ ; Final R indices [ $I > 2\sigma(I)$ ]  $R1 = 0.0484$ ,  $wR2 = 0.1324$ .

---

#### 4 References

1. a) K. Utimoto, M. Tamura and K. Sisido, *Tetrahedron*, 1973, **29**, 1169; b) J. A. Stafford and J. E. McMurry, *Tetrahedron Lett.*, 1988, **29**, 2531; c) S. V. Frye, M. C. Johnson and N. L. Valvano, *J. Org. Chem.*, 1991, **56**, 3750; d) K. Chen, Z. Zhang, Y. Wei and M. Shi, *Chem. Commun.*, 2012, **48**, 7696; e) T. M. Acker, A. Khatri, K. M. Vance, C. Slabber, J. Bacsa, J. P. Snyder, S. F. Traynelis and D. C. Liotta, *J. Med. Chem.*, 2013, **56**, 6434; f) K. Chen, Z. Z. Zhu, Y. S. Zhang, X. Y. Tang and M. Shi, *Angew. Chem., Int. Ed.*, 2014, **53**, 6645; g) L. Z. Yu, Y. Wei and M. Shi, *Chem. Commun.*, 2016, **52**, 13163; h) P. H. Li, L. Z. Yu, X. Y. Zhang and M. Shi, *Org. Lett.*, 2018, **20**, 4516.
2. X. Zhu, W. Deng, M. F. Chiou, C. Ye, W. Jian, Y. Zeng, Y. Jiao, L. Ge, Y. Li, X. Zhang and H. Bao, *J. Am. Chem. Soc.*, 2019, **141**, 548.
